# Supplementary material for: MixWILD: A program for examining the effects of variance and slope of time-varying variables in intensive longitudinal data
Source: PubMed Central journal article supplement (PMC7406537; doi:10.3758/s13428-019-01322-1), 2020-01-02
Supplement: 13428_2019_1322_MOESM1_ESM.pdf [file 13428_2019_1322_MOESM1_ESM.pdf]

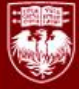

THE UNIVERSITY OF  
CHICAGO

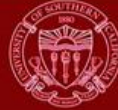

USC University of  
Southern California

# MIXWILD

## User's Guide

---

Mixed Model Analysis With Intensive Longitudinal Data

Donald Hedeker  
Genevieve Fridlund Dunton

©2018, University of Chicago & University of Southern California

The development of MixWILD program was supported by the National Heart, Lung, and Blood Institute, National Institute of Health - "Novel Statistical Models for EMA Studies of Physical Activity" Grant 5R01HL121330-05.

We thank Chih-Hsiang (Jason) Yang for his great effort in creating this document. We also thank Rachel Nordgren, Eldin Dzubur, Aditya Ponnada, and Stephen Intille who contributed heavily to the development of this software.

Special thanks to Chih-Ping Chou, Jimi Huh, and Jaclyn Maher for their helpful comments and suggestions.

The suggested citation for this program is:

*MixWILD: A freeware program for mixed model analysis with intensive longitudinal data (in prep).*

## Table of Contents

|                                                                                           |    |
|-------------------------------------------------------------------------------------------|----|
| 1. Overview of Mix Suite: The two-stage approach.....                                     | 1  |
| 1.1. Instructions for downloading the MixWILD program .....                               | 2  |
| 1.2. Instructions for formatting your dataset to be MixWILD friendly .....                | 2  |
| 1.3. Description of the example dataset .....                                             | 3  |
| 1.4. MixWILD compatibility notes for Windows and macOS users .....                        | 4  |
| 2. Example 1: Running a standard multilevel model (MLM) using MixWILD .....               | 5  |
| 2.2. Step-by-step instructions for specifying a standard multilevel model .....           | 6  |
| 2.2. Brief interpretation of the multilevel model results .....                           | 14 |
| 3. Example 2: Running Mixregls - Linear Regression model in MixWILD .....                 | 15 |
| 3.1. Step-by-step instructions on running Mixregls - Linear Regression model .....        | 16 |
| 4.2. Brief interpretation of the Mixregls - Linear Regression model results .....         | 29 |
| 4. Example 3: Running Mixregls- Logistic Regression model in MixWILD.....                 | 31 |
| 4.1. Step-by-step instructions for running Mixregls-Logistic regression model .....       | 32 |
| 4.2. Brief interpretation of Mixregls-Logistic regression model results.....              | 41 |
| 5. Example 4: Running Mixregmls- Linear regression model in MixWILD .....                 | 43 |
| 5.1. Step-by-step instructions on running Mixregmls - Linear regression model .....       | 44 |
| 5.1. Brief interpretation of Mixregmls - Linear Regression model results.....             | 55 |
| 6. Example 5: Running Mixregmls - Logistic regression model in MixWILD .....              | 57 |
| 6.1. Step-by-step instructions for running a Mixregmls- Logistic regression model .....   | 58 |
| 6.3. Brief interpretation of Mixregmls-Logistic regression model result .....             | 69 |
| 7. Appendix A: Steps to take when the program does not converge to a solution .....       | 73 |
| 8. Appendix B: Steps to plot the random subject effects from the ebvar file solution..... | 76 |

## 1. Overview of Mix Suite: The two-stage approach

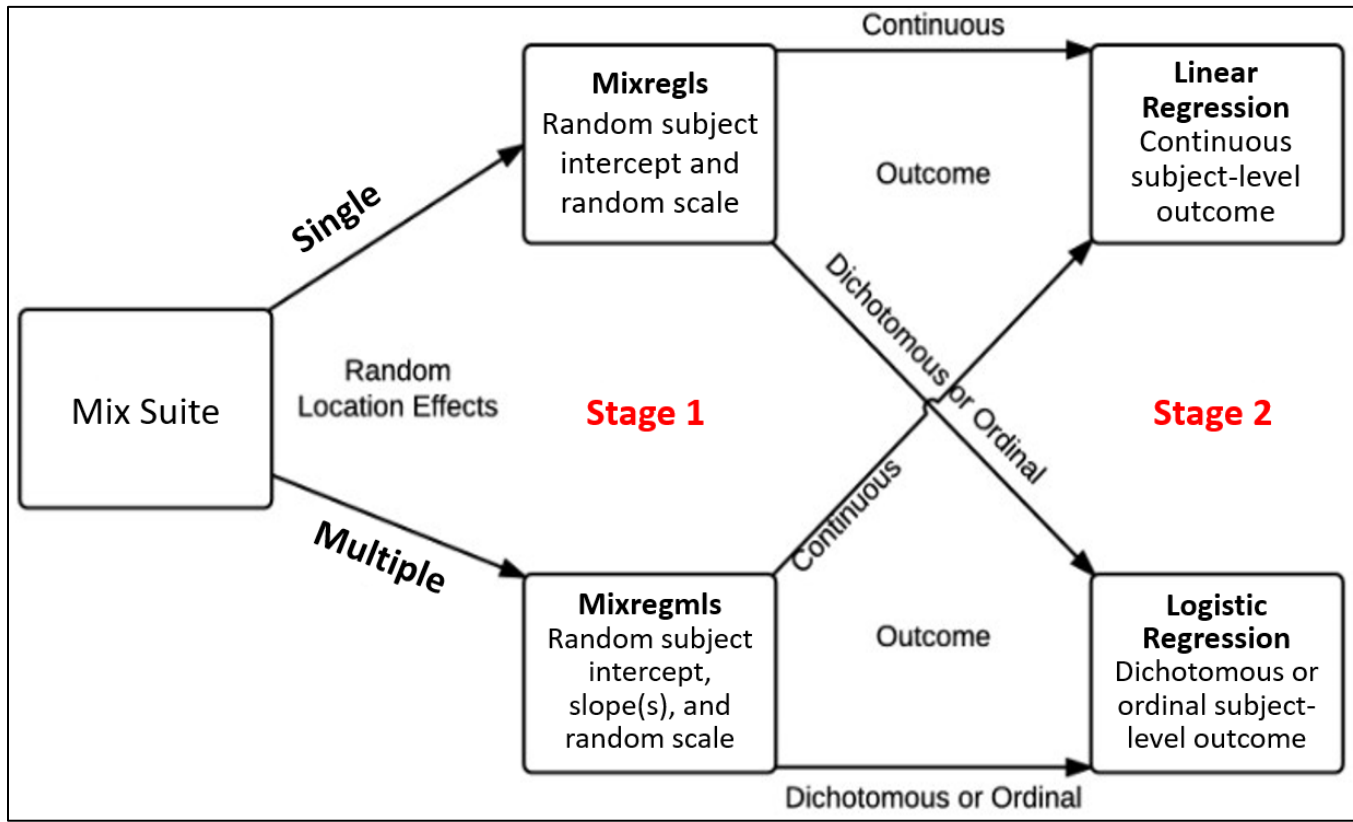

### Stage 1 models

**Mixregs (Mixed effects Regression Location Scale modeling):** This multilevel model estimates a mixed-effects location scale model, including a *random subject intercept* and a *random subject scale effect*. A random subject intercept effect reflects a subject's mean (or location), and a random scale effect reflects a subject's variability, respectively.

**Mixregmls (Mixed effects Regression Multiple Location Scale modeling):** This model estimates a mixed-effects location scale model, including a *random subject intercept and slope(s)*, as well as a *random subject scale effect*. The random subject intercept and slope(s) are considered location effects because they reflect a subject's mean response, while the random subject scale effect reflects a subject's variability.

### Stage 2 models

**Linear Regression model:** This single level linear regression model predicts a *continuous subject-level outcome* using the random subject effects from the Stage 1 model as regressors. The random effects can be included in this linear regression model as main effects and as interactions with other subject-level regressors.

**Logistic Regression model:** This single level logistic regression model predicts a *binary or ordinal subject-level outcome* using the random subject effects from the Stage 1 model as regressors. The random effects can be included in the (binary or ordinal) logistic regression model as main effects and as interactions with other subject-level regressors.

## 1.1. Instructions for downloading the MixWILD program

1. Visit: <https://reach-lab.github.io/MIXWILDGUI/>
2. Submit your email prior to downloading the application in the web page to receive notifications on major software updates.
3. Click on macOS (64-bit) or Windows (32-bit) to download the program.
4. Select your directory to save the program.
5. When finished downloading, double-click on the MixWILD icon and follow the instructions to complete installation.

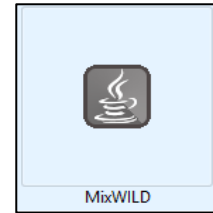

and

## 1.2. Instructions for formatting your dataset to be MixWILD friendly

1. The dataset should be a **.csv file** with variable names in the **first row**.
2. Data should be in the **long format** and sorted ascending or descending by ID number.
3. Missing values should **not be blank or periods (.)** in the dataset and should be coded as **numeric values** only (e.g., '-999').

### Example dataset overview

| A  | B    | C   | D       | E   | F     | G     | H          | I          | J               | K               |
|----|------|-----|---------|-----|-------|-------|------------|------------|-----------------|-----------------|
| ID | AGE  | SEX | WEEKEND | DOW | OBESE | BMI   | NEG_AFFECT | POS_AFFECT | MVPA_daily_mins | SED_daily_hours |
| 11 | 7.47 | 1   | 1       | 6   | 1     | 22.13 | 20         | 44         | 31.9            | 8.33            |
| 11 | 7.47 | 1   | 0       | 0   | 1     | 22.13 | 30         | 44         | 31.9            | 8.33            |
| 11 | 7.47 | 1   | 1       | 6   | 1     | 22.13 | 10         | 46         | 31.9            | 8.33            |
| 11 | 7.47 | 1   | 1       | 6   | 1     | 22.13 | 14         | 47         | 31.9            | 8.33            |
| 11 | 7.47 | 1   | 0       | 4   | 1     | 22.13 | 16         | 47         | 31.9            | 8.33            |
| 11 | 7.47 | 1   | 1       | 5   | 1     | 22.13 | 10         | 49         | 31.9            | 8.33            |
| 11 | 7.47 | 1   | 1       | 5   | 1     | 22.13 | 50         | 49         | 31.9            | 8.33            |
| 12 | 5.47 | 1   | 0       | 1   | 0     | 21.26 | 60         | 19         | 24.35           | 8.6             |
| 12 | 5.47 | 1   | 0       | 1   | 0     | 21.26 | -999       | 23         | 24.35           | 8.6             |
| 12 | 5.47 | 1   | 1       | 6   | 0     | 21.26 | -999       | 32         | 24.35           | 8.6             |
| 12 | 5.47 | 1   | 1       | 6   | 0     | 21.26 | -999       | 33         | 24.35           | 8.6             |
| 12 | 5.47 | 1   | 0       | 0   | 0     | 21.26 | 27         | 35         | 24.35           | 8.6             |
| 12 | 5.47 | 1   | 1       | 5   | 0     | 21.26 | 21         | 36         | 24.35           | 8.6             |
| 12 | 5.47 | 1   | 1       | 5   | 0     | 21.26 | -999       | 46         | 24.35           | 8.6             |
| 12 | 5.47 | 1   | 1       | 6   | 0     | 21.26 | -999       | 58         | 24.35           | 8.6             |
| 12 | 5.47 | 1   | 1       | 5   | 0     | 21.26 | 12         | -999       | 24.35           | 8.6             |
| 12 | 5.47 | 1   | 1       | 5   | 0     | 21.26 | 50         | -999       | 24.35           | 8.6             |
| 13 | 3.47 | 1   | 0       | 0   | 1     | 21.12 | -999       | 47         | 34.56           | 8.57            |
| 13 | 3.47 | 1   | 0       | 1   | 1     | 21.12 | 50         | 50         | 34.56           | 8.57            |
| 13 | 3.47 | 1   | 0       | 0   | 1     | 21.12 | -999       | 53         | 34.56           | 8.57            |
| 13 | 3.47 | 1   | 1       | 6   | 1     | 21.12 | 10         | 60         | 34.56           | 8.57            |
| 13 | 3.47 | 1   | 1       | 6   | 1     | 21.12 | -999       | 61         | 34.56           | 8.57            |

### 1.3. Description of the example dataset

Intensive longitudinal data (Number of subjects=1245) from an ecological momentary assessment (EMA) study (range between 4-14 days) will be used as an example dataset to demonstrate different models in the MixWILD program.

#### Variables in the example dataset

**ID:** Participant ID number

**SEX:** 0 (female); 1 (male)

**AGE:** Number of years (centered around mean age=29.29)

**WEEKEND:** 0 (weekday); 1 (weekend)

**DOW:** Day of week; 0: Monday, 1: Tuesday, ..., 6: Sunday

**POS\_AFFECT:** Levels of positive affect reported in each prompt

**NEG\_AFFECT:** Levels of negative affect reported in each prompt

**MVPA\_daily\_mins:** Daily averaged moderate-to-vigorous physical activity time  
in minutes

**SED\_daily\_hours:** Daily averaged sedentary time in hours

**OBESE:** 0 (not obese); 1 (obese)

**BMI:** Body Mass Index (centered around mean BMI=24.66)

#### Descriptive summary of the example variables

|    | Variable        | Type                  | Time-varying vs. Time-invariant | N     | Mean   | SD     | Min    | Max   | Range |
|----|-----------------|-----------------------|---------------------------------|-------|--------|--------|--------|-------|-------|
| 1  | ID              | Nominal               | Time-invariant                  | 15167 | 639.07 | 393.94 | 1      | 1369  | 1368  |
| 2  | AGE (centered)  | Continuous            | Time-invariant                  | 14851 | 0      | 16.37  | -23.53 | 47.47 | 71    |
| 3  | SEX             | Dichotomous           | Time-invariant                  | 14899 | 0.74   | 0.44   | 0      | 1     | 1     |
| 4  | DOW             | Categorical / Ordinal | Time-varying                    | 15167 | 3.53   | 2.25   | 0      | 6     | 6     |
| 5  | WEEKEND         | Dichotomous           | Time-varying                    | 15167 | 0.5    | 0.5    | 0      | 1     | 1     |
| 6  | POS_AFFECT      | Continuous            | Time-varying                    | 13514 | 43.75  | 13.7   | 10     | 70    | 60    |
| 7  | NEG_AFFECT      | Continuous            | Time-varying                    | 13491 | 28.91  | 14.11  | 10     | 70    | 60    |
| 8  | MVPA_daily_mins | Continuous            | Time-invariant                  | 14750 | 41.96  | 12.34  | 15.07  | 88.46 | 73.39 |
| 9  | SED_daily_hours | Continuous            | Time-invariant                  | 14094 | 9.41   | 1.56   | 5.35   | 15.3  | 9.95  |
| 10 | OBESE           | Dichotomous           | Time-invariant                  | 14432 | 0.47   | 0.5    | 0      | 1     | 1     |
| 11 | BMI (centered)  | Continuous            | Time-invariant                  | 14511 | 0      | 6.87   | -11.25 | 23.89 | 35.14 |

## 1.4. MixWILD compatibility notes for Windows and macOS users

The user interface for MixWILD runs in a Java runtime environment that provides feature parity between Windows and Mac versions. Native 64-bit binaries for macOS and Windows written in Fortran are used to execute statistical analyses and generate model output.

- To allow for compatibility with older operating systems and architecture, the Windows version features an option to use 32-bit binaries.
- Users running MixWILD in a virtual machine, such as VMWare or Parallels, should ensure working directories are isolated from hypervisor processes that allow sharing between host and guest. These include common directories such as *Downloads*, *Desktop*, and *Documents*. Instead, create a new folder located at “C:/MixWILD” to improve compatibility.

## Suggested references for mixed-effects location-scale model

- Hedeker, D., & Nordgren, R. (2013). MIXREGLS: a program for mixed-effects location scale analysis. *Journal of statistical software*, 52(12), 1.
- Hedeker, D., Mermelstein, R.J., & Demirtas, H. (2012). Modeling between-subject and within-subject variances in ecological momentary assessment data using mixed-effects location scale models. *Statistics in medicine*, 31(27), 3328-3336.
- Maher J.P., Dzibur, E., Nordgren, R. Huh, J., Chou, C.P., Hedeker, D., Dunton, G. F. Do fluctuations in positive affective and physical feeling states predict physical activity and sedentary time? *Psychology of Sport and Exercise*. *In press*.
- Maher, J.P., Huh, J., Intille, S., Hedeker, D., & Dunton, G.F. (2018). Greater variability in daily physical activity is associated with poorer mental health profiles among obese adults. *Mental Health and Physical Activity*, 14, 74-81.

## 2. Example 1: Running a standard multilevel model (MLM) using MixWILD

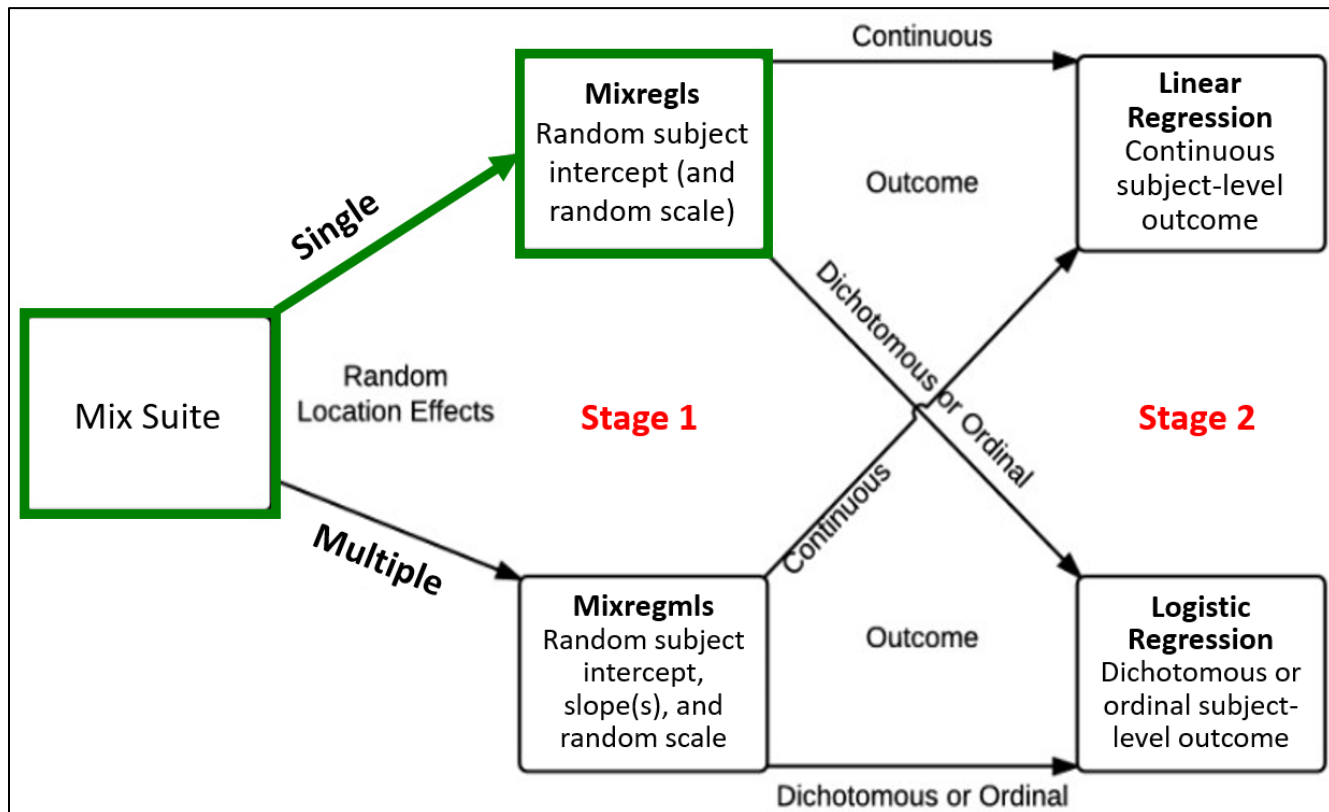

### Example question for applying standard multilevel model in MixWILD

- Examine whether participants' momentary negative affect (within-subject, continuous, time-varying variable) can predict their momentary positive affect (within-subject, continuous, time-varying variable), after controlling for sex.

**Regressors:** Sex (time-invariant); Negative affect (time-varying)

**Outcome:** Positive affect (time-varying)

**Note:**

- A standard multilevel model can be specified in the Stage 1 interface by selecting the "None" option for the Stage 2 Outcome.
- Interaction terms are not generated automatically by the Stage 1 interface. If you would like to test interaction(s), you must manually create interaction variable(s) in your dataset before running the program.

## 2.2. Step-by-step instructions for specifying a standard multilevel model in MixWILD

1. Double-click on the MixWILD icon to open the main window.
2. Click on **“File”** and then select **“New Model”** (or use keyboard shortcut Ctrl + N).

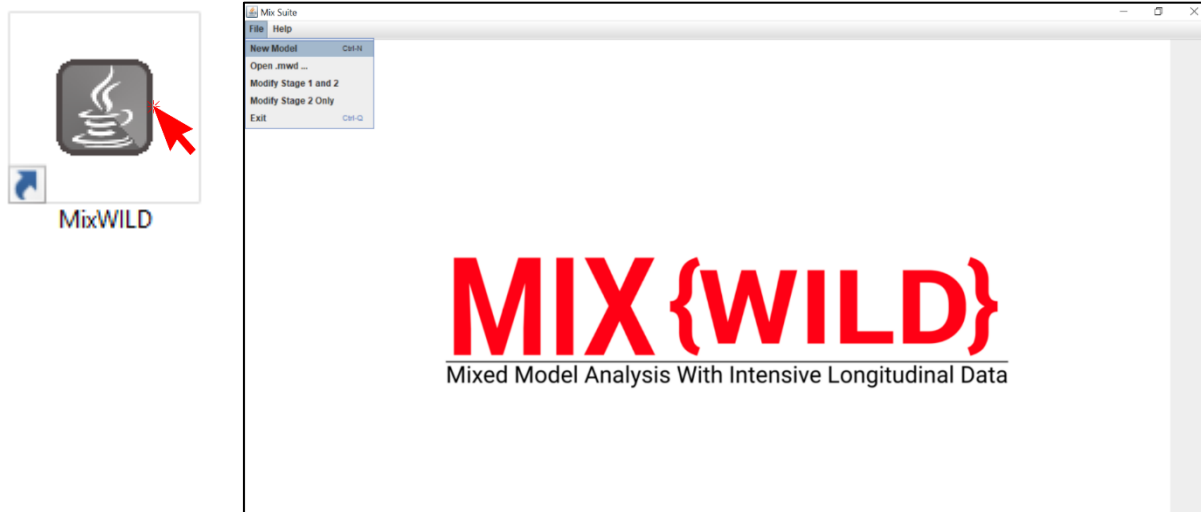

3. Click on **“Instructions”** to make sure your data are in the correct format.

The image shows a dialog box titled 'Is your dataset Mix{WILD} friendly?'. At the top right is a 'Check here...' button with a red arrow pointing to it. Below this are fields for 'Data File:' and 'Title:', each with a 'Browse' button. There are radio button options for 'Random Location Effects' (Intercept, Intercept + Slope(s)), 'Random Scale?' (checkbox), 'Stage 2 Outcome:' (Continuous, Dichotomous/Ordinal, None), and 'Contains missing values?' (Yes, No). A 'Missing value code:' text box is also present. At the bottom, there are 'Cancel', 'Reset', and 'Submit' buttons. The MixWILD logo and subtitle are visible in the bottom left corner.

The image shows a dialog box titled 'Please follow these instructions ...'. It contains a list of six instructions:

- 1) You should always use a .csv file
- 2) You should ensure that missing values are not blanks
- 3) Missing value codes should be numeric only
- 4) Make sure your missing value code is the same as your dataset
- 5) Please ensure that the data is sorted by IDs
- 6) The first row in the .csv file should be column names

A 'Got it' button is located at the bottom right of the dialog box.



- Click on **“Browse”** to select the location of your data file (in .csv) and then click **“Open”**.

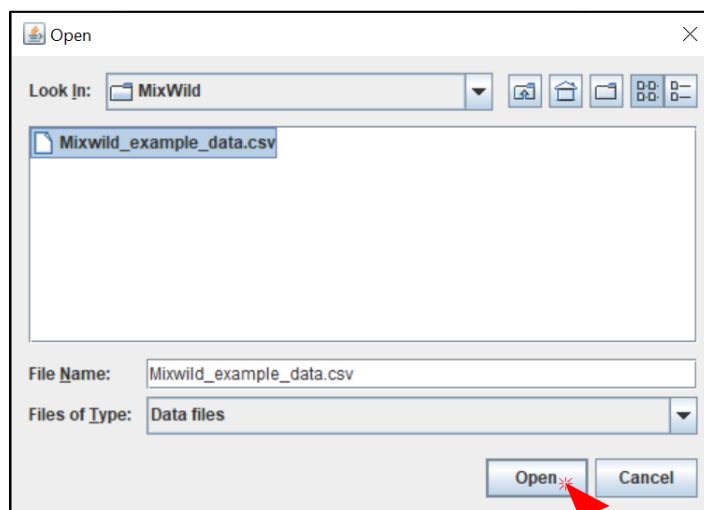

- Click on **“View Data”** to preview your data file and to verify the data and format are correct.

The screenshot shows the 'Mix Suite' application interface with the 'View Data' tab selected. The table displays the following data:

| ID | AGE   | SEX | WEEKEND | DOW | OBESE | BMI   | NEG_AFFE... | POS_AFFE... | MVPA_daily... | SED_daily_... |
|----|-------|-----|---------|-----|-------|-------|-------------|-------------|---------------|---------------|
| 1  | 10.47 | 1   | 0       | 0   | 1     | -4.79 | 40          | 27          | 38.19         | -999          |
| 1  | 10.47 | 1   | 0       | 1   | 1     | -4.79 | -999        | 30          | 38.19         | -999          |
| 1  | 10.47 | 1   | 0       | 1   | 1     | -4.79 | 50          | 35          | 38.19         | -999          |
| 1  | 10.47 | 1   | 1       | 5   | 1     | -4.79 | 10          | 38          | 38.19         | -999          |
| 1  | 10.47 | 1   | 0       | 1   | 1     | -4.79 | 35          | 43          | 38.19         | -999          |
| 1  | 10.47 | 1   | 1       | 5   | 1     | -4.79 | 40          | 44          | 38.19         | -999          |
| 1  | 10.47 | 1   | 0       | 1   | 1     | -4.79 | 10          | -999        | 38.19         | -999          |
| 1  | 10.47 | 1   | 0       | 0   | 1     | -4.79 | 20          | -999        | 38.19         | -999          |
| 1  | 10.47 | 1   | 0       | 0   | 1     | -4.79 | 30          | -999        | 38.19         | -999          |
| 1  | 10.47 | 1   | 0       | 0   | 1     | -4.79 | 40          | -999        | 38.19         | -999          |
| 1  | 10.47 | 1   | 1       | 5   | 1     | -4.79 | 40          | -999        | 38.19         | -999          |
| 2  | 20.47 | 1   | 0       | 3   | 1     | -4.79 | 52          | 15          | 22.03         | 9.46          |
| 2  | 20.47 | 1   | 0       | 2   | 1     | -4.79 | 39          | 17          | 22.03         | 9.46          |
| 2  | 20.47 | 1   | 0       | 3   | 1     | -4.79 | 49          | 22          | 22.03         | 9.46          |
| 2  | 20.47 | 1   | 1       | 6   | 1     | -4.79 | 50          | 22          | 22.03         | 9.46          |
| 2  | 20.47 | 1   | 1       | 6   | 1     | -4.79 | 59          | 24          | 22.03         | 9.46          |
| 2  | 20.47 | 1   | 1       | 5   | 1     | -4.79 | 30          | 33          | 22.03         | 9.46          |
| 2  | 20.47 | 1   | 1       | 6   | 1     | -4.79 | 20          | 35          | 22.03         | 9.46          |
| 2  | 20.47 | 1   | 0       | 4   | 1     | -4.79 | 10          | 38          | 22.03         | 9.46          |
| 2  | 20.47 | 1   | 1       | 6   | 1     | -4.79 | 40          | 39          | 22.03         | 9.46          |
| 2  | 20.47 | 1   | 1       | 6   | 1     | -4.79 | 41          | 44          | 22.03         | 9.46          |
| 2  | 20.47 | 1   | 1       | 5   | 1     | -4.79 | 50          | 46          | 22.03         | 9.46          |
| 2  | 20.47 | 1   | 0       | 4   | 1     | -4.79 | 50          | 48          | 22.03         | 9.46          |
| 2  | 20.47 | 1   | 1       | 5   | 1     | -4.79 | 40          | 49          | 22.03         | 9.46          |
| 2  | 20.47 | 1   | 1       | 5   | 1     | -4.79 | 40          | 49          | 22.03         | 9.46          |
| 2  | 20.47 | 1   | 0       | 4   | 1     | -4.79 | 50          | 51          | 22.03         | 9.46          |
| 2  | 20.47 | 1   | 0       | 2   | 1     | -4.79 | 10          | 52          | 22.03         | 9.46          |
| 2  | 20.47 | 1   | 0       | 0   | 1     | -4.79 | 50          | 59          | 22.03         | 9.46          |
| 2  | 20.47 | 1   | 0       | 0   | 1     | -4.79 | 30          | 62          | 22.03         | 9.46          |
| 2  | 20.47 | 1   | 1       | 5   | 1     | -4.79 | 40          | 65          | 22.03         | 9.46          |
| 2  | 20.47 | 1   | 1       | 5   | 1     | -4.79 | 20          | 66          | 22.03         | 9.46          |
| 3  | 17.47 | 1   | 0       | 2   | 1     | -4.79 | 61          | 15          | 22.03         | 9.46          |
| 3  | 17.47 | 1   | 0       | 4   | 1     | -4.79 | 38          | 22          | 22.03         | 9.46          |
| 3  | 17.47 | 1   | 1       | 6   | 1     | -4.79 | 60          | 25          | 22.03         | 9.46          |
| 3  | 17.47 | 1   | 0       | 2   | 1     | -4.79 | 33          | 38          | 22.03         | 9.46          |

6. Add a title for your output files. This title name is later displayed in your output files.
7. Select **“Intercept”** from Random Location Effects specification and uncheck **“Random Scale”**.
8. Select **“None”** for Stage 2 Outcome.
9. Click on missing values if there are any in your dataset; specify the missing value code in the box (e.g., ‘-999’).

Is your dataset Mix{WILD} friendly? [Check here...](#)

Data File:  [Browse](#)

Title:

Random Location Effects:  Intercept  Intercept + Slope(s)

Random Scale?

Stage 2 Outcome:  Continuous  Dichotomous/Ordinal  None

Contains missing values?  Yes  No

Missing value code:

**MIX{WILD}**  
Mixed Model Analysis With Intercept 1 nonordinal Data

[Cancel](#) [Reset](#) [Submit](#)

10. After you submit this first page, you will advance to the page that enables you to configure your Stage 1 model.

Mix Suite  
File Help

Stage 1 Configuration Stage 2 Configuration Stage 1 Results Stage 2 Results View Model View Data

Selected model configuration:  
Random location effects: Intercept  
Stage 2 outcome: None

ID Variable:

Stage 1 Outcome:

[Configure Stage 1 Regressors ...](#)  
[Options ...](#)

Specify the relationship between the mean and WS variance.  
 No Association  
 Linear Association  
 Quadratic Association

**MIX{WILD}**  
Mixed Model Analysis With Intercept 1 nonordinal Data

Stage 1 Regressors

|         | Mean | BS Variance | WS Variance |         | Mean | BS Variance | WS Variance |
|---------|------|-------------|-------------|---------|------|-------------|-------------|
| Level-1 |      |             |             | Level-2 |      |             |             |

[Reset](#) [Run Stage 1](#)

11. On the Stage 1 Configuration page, select your ID variable and positive affect (a time-varying variable) as your outcome variable.
12. By default, **“No Association”** is assumed between the mean and within-subject variance (only relevant for models with random scale). For random scale models, a linear or quadratic association is also possible.

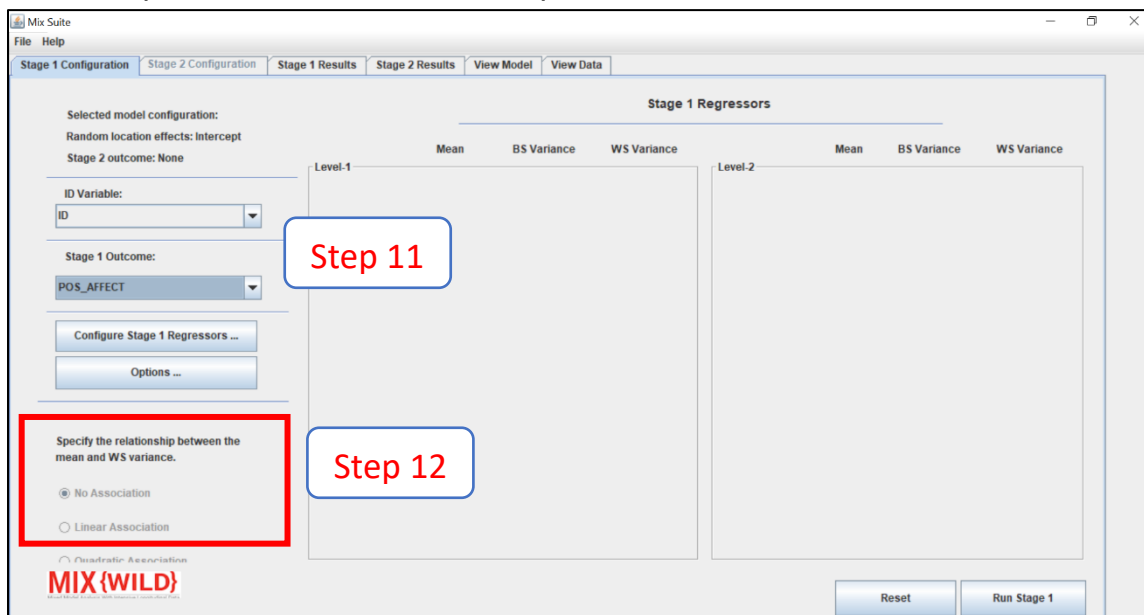

13. Click on **“Modify Stage 1 regressors”** to add other regressors.
14. Select and add time-varying regressor **“NEG\_AFFECT”** and time-invariant regressor **“SEX”** into the corresponding boxes.

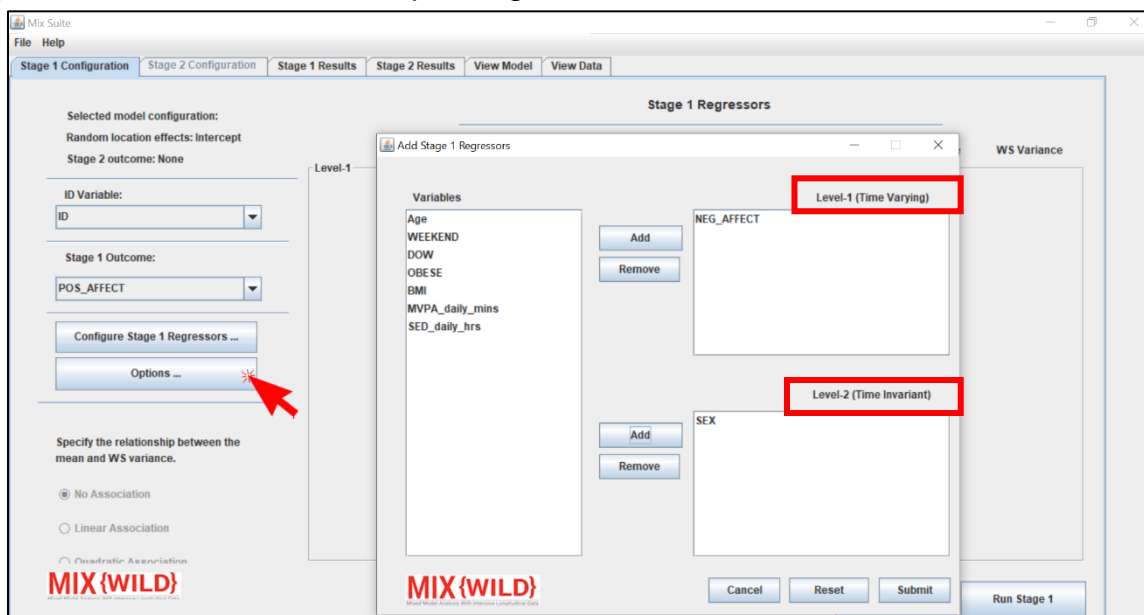

15. Select the box in the mean column to allow regressors to predict the mean level of outcome only.
16. Select “**Disaggregate**” for time-varying variable(s) in the mean column if the decomposition of the within-subject and between-subject effects in predicting the outcome is desired.

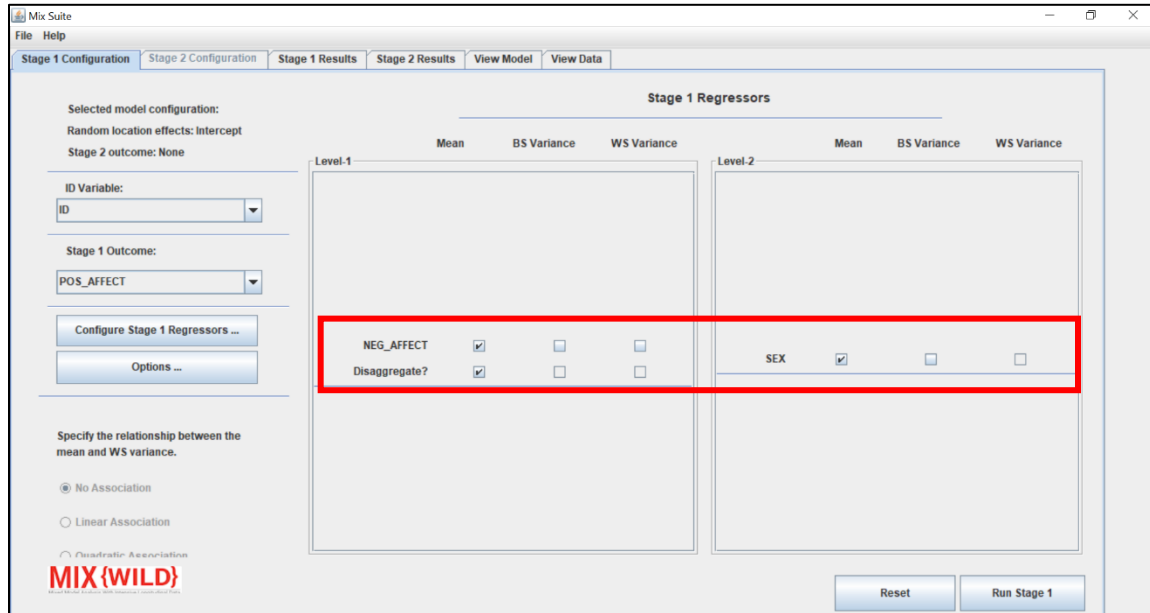

17. Click on “**Options**” to change other default settings if needed.
18. For models that do not include a random scale effect, removing subjects with no variance in outcome variable (positive affect in this example) is not necessary. Click on “**Submit**” to continue.

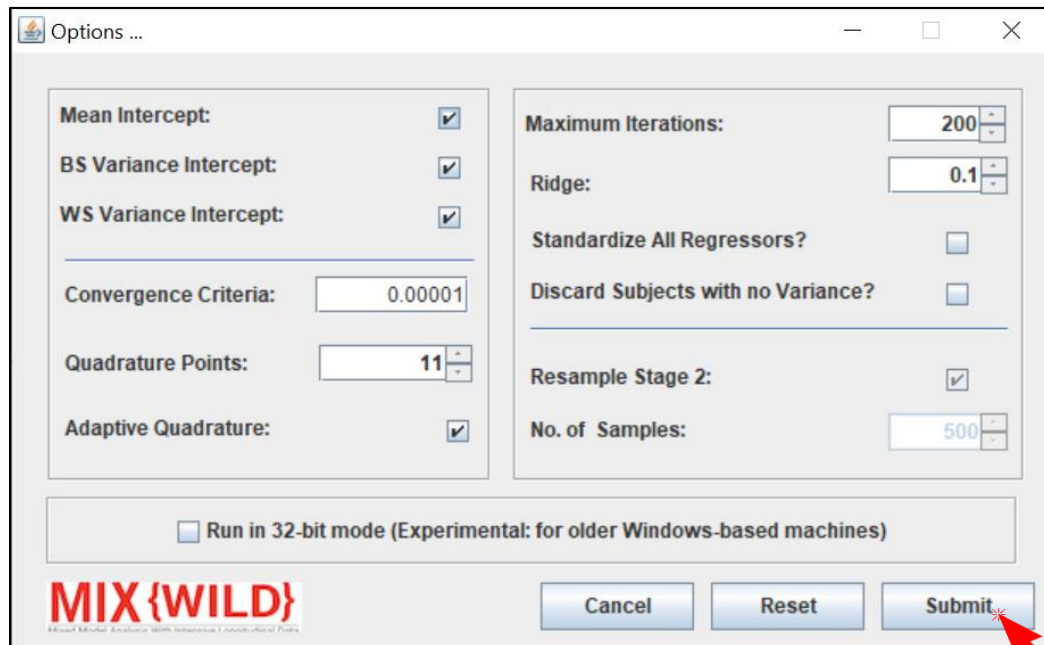

19. Verify your model specifications and click on **“Run Stage 1”** to generate the definition (Def) file. The definition file contains the syntax that instructs the program to estimate the specified model. You can save the definition file by clicking **“Save Def File”**.

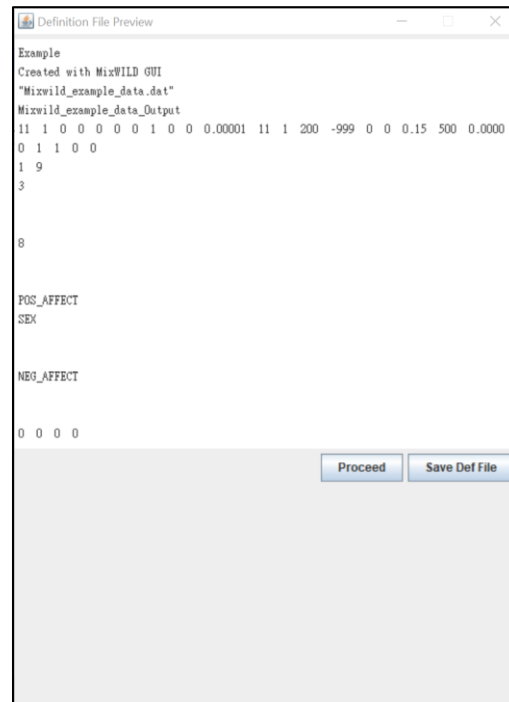

20. In the definition file, click on **“Proceed”** to run your model and generate model output files.
21. A window will appear while model estimation is in progress.

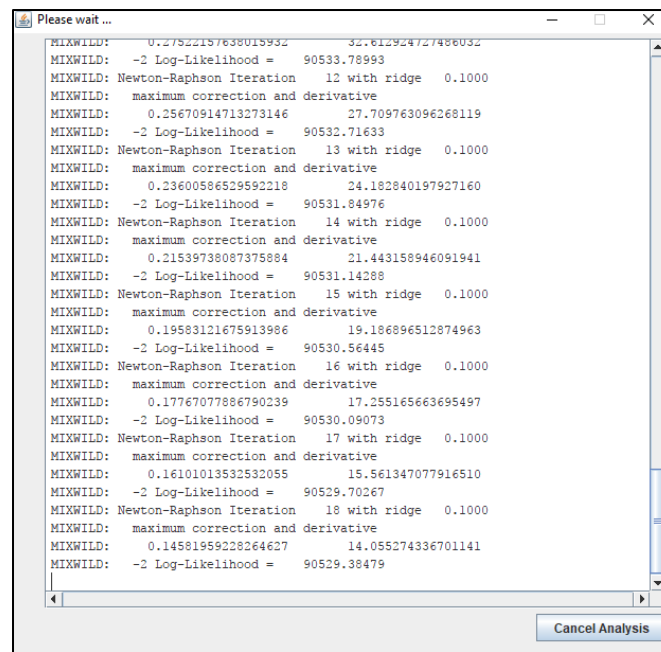

22. If the following warning message appears, it indicates that computational difficulties were encountered and prevented the model parameters from being estimated successfully. In this case, confirm the format of your dataset and your model specifications. Troubleshooting suggestions are listed in Appendix A.

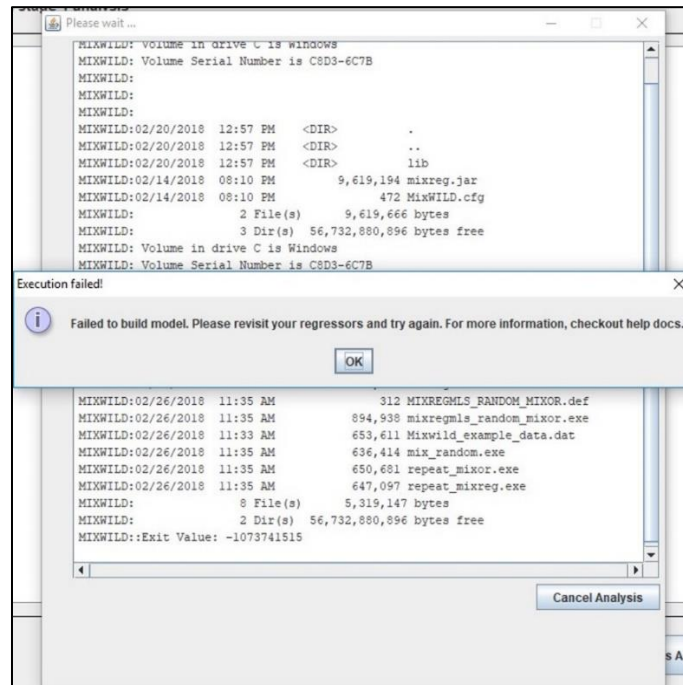

23. When the model analyzing is completed, the Stage 1 results can be seen by clicking the “Stage 1 Results” box.

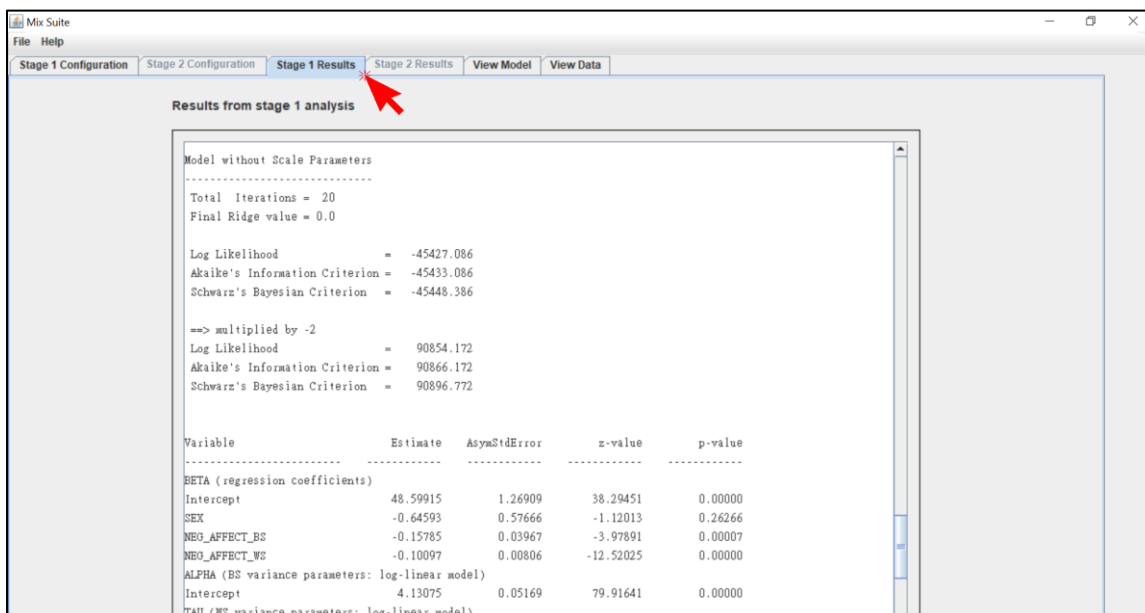

24. All files generated from the program can be found in a folder with the prefix MixWILD under the same directory of your dataset.

| Name                 | Date modified      | Type                 | Size   |
|----------------------|--------------------|----------------------|--------|
| MIXWILD1519889795    | 3/6/2018 5:22 PM   | File folder          |        |
| Mixwild_example_data | 2/26/2018 11:54 AM | Microsoft Excel C... | 635 KB |

25. In the Output\_1 txt file, you can find your results that are identical to the results found in the Stage 1 results box

| Name                              | Date modified     | Type        | Size   |
|-----------------------------------|-------------------|-------------|--------|
| work                              | 3/6/2018 5:39 PM  | File folder |        |
| mix_random                        | 2/26/2018 2:10 PM | Application | 665 KB |
| mixor                             | 2/26/2018 2:10 PM | Application | 914 KB |
| mixreg                            | 2/26/2018 2:10 PM | Application | 967 KB |
| MIXREGLS_RANDOM_MIXREG            | 2/26/2018 2:10 PM | DEF File    | 1 KB   |
| Mixwild_example_data              | 3/6/2018 5:30 PM  | DAT File    | 635 KB |
| Mixwild_example_data_Output       | 2/26/2018 2:10 PM | DEF File    | 1 KB   |
| Mixwild_example_data_Output_1     | 2/26/2018 2:10 PM | OUT File    | 11 KB  |
| Mixwild_example_data_Output_ebvar | 2/26/2018 2:10 PM | DAT File    | 38 KB  |
| repeat_mixor                      | 2/26/2018 2:10 PM | Application | 680 KB |
| repeat_mixreg                     | 2/26/2018 2:10 PM | Application | 677 KB |

| Variable                                         | Estimate | AsymStdError | z-value   | p-value |
|--------------------------------------------------|----------|--------------|-----------|---------|
| <b>Model without Scale Parameters</b>            |          |              |           |         |
| Total Iterations = 20                            |          |              |           |         |
| Final Ridge value = 0.0                          |          |              |           |         |
| Log Likelihood = -45427.086                      |          |              |           |         |
| Akaike's Information Criterion = -45433.086      |          |              |           |         |
| Schwarz's Bayesian Criterion = -45448.386        |          |              |           |         |
| ==> multiplied by -2                             |          |              |           |         |
| Log Likelihood = 90854.172                       |          |              |           |         |
| Akaike's Information Criterion = 90866.172       |          |              |           |         |
| Schwarz's Bayesian Criterion = 90896.772         |          |              |           |         |
| BETA (regression coefficients)                   |          |              |           |         |
| Intercept                                        | 48.59915 | 1.26909      | 38.29451  | 0.00000 |
| SEX                                              | -0.64593 | 0.57666      | -1.12013  | 0.26266 |
| NEG_AFFECT_BS                                    | -0.15785 | 0.03967      | -3.97891  | 0.00007 |
| NEG_AFFECT_WS                                    | -0.10097 | 0.00806      | -12.52025 | 0.00000 |
| ALPHA (BS variance parameters: log-linear model) |          |              |           |         |
| Intercept                                        | 4.13075  | 0.05169      | 79.91641  | 0.00000 |
| TAU (WS variance parameters: log-linear model)   |          |              |           |         |
| Intercept                                        | 4.83616  | 0.01385      | 349.16421 | 0.00000 |

## 2.2. Brief interpretation of the multilevel model results

```

-----
Model without Scale Parameters
-----
Total Iterations = 20
Final Ridge value = 0.0

Log Likelihood = -45427.086
Akaike's Information Criterion = -45433.086
Schwarz's Bayesian Criterion = -45448.386

==> multiplied by -2
Log Likelihood = 90854.172
Akaike's Information Criterion = 90866.172
Schwarz's Bayesian Criterion = 90896.772

Variable          Estimate      AsymStdError      z-value      p-value
-----
BETA (regression coefficients)
Intercept         48.59915       1.26909          38.29451     0.00000
SEX               -0.64593       0.57666          -1.12013     0.26266
NEG_AFFECT_BS    -0.15785       0.03967          -3.97891     0.00007
NEG_AFFECT_WS    -0.10097       0.00806          -12.52025    0.00000
ALPHA (BS variance parameters: log-linear model)
Intercept         4.13075       0.05169          79.91641     0.00000
TAU (WS variance parameters: log-linear model)
Intercept         4.83616       0.01385          349.16421    0.00000

```

- Notice that the model results do not include effects on the BS or WS variances; as they were not specified earlier. Alpha and Tau intercepts are default parameters in the output table. These represent the BS and WS variances of positive affect, respectively, on the log scale.
- Results show that after controlling for sex, individuals who have higher mean negative affect have lower mean levels of positive affect (BS estimate = -0.1579,  $p < .001$ ).
- When individuals have higher momentary negative affect than their own mean, they have lower momentary positive affect (WS estimate = -0.1010,  $p < .001$ ).
- The BS variance in positive affect is reported as the Intercept estimate under Alpha, estimated as  $\exp(4.13) = 62.18$ . The WS variance in positive affect is reported as the Intercept estimate under Tau, estimated as  $\exp(4.84) = 126.47$ . Thus, the intraclass correlation (ICC) for positive affect is estimated as  $62.18 / (62.18 + 126.47) = 0.33$ .



### 3. Example 2: Running Mixregls - Linear Regression model in MixWILD

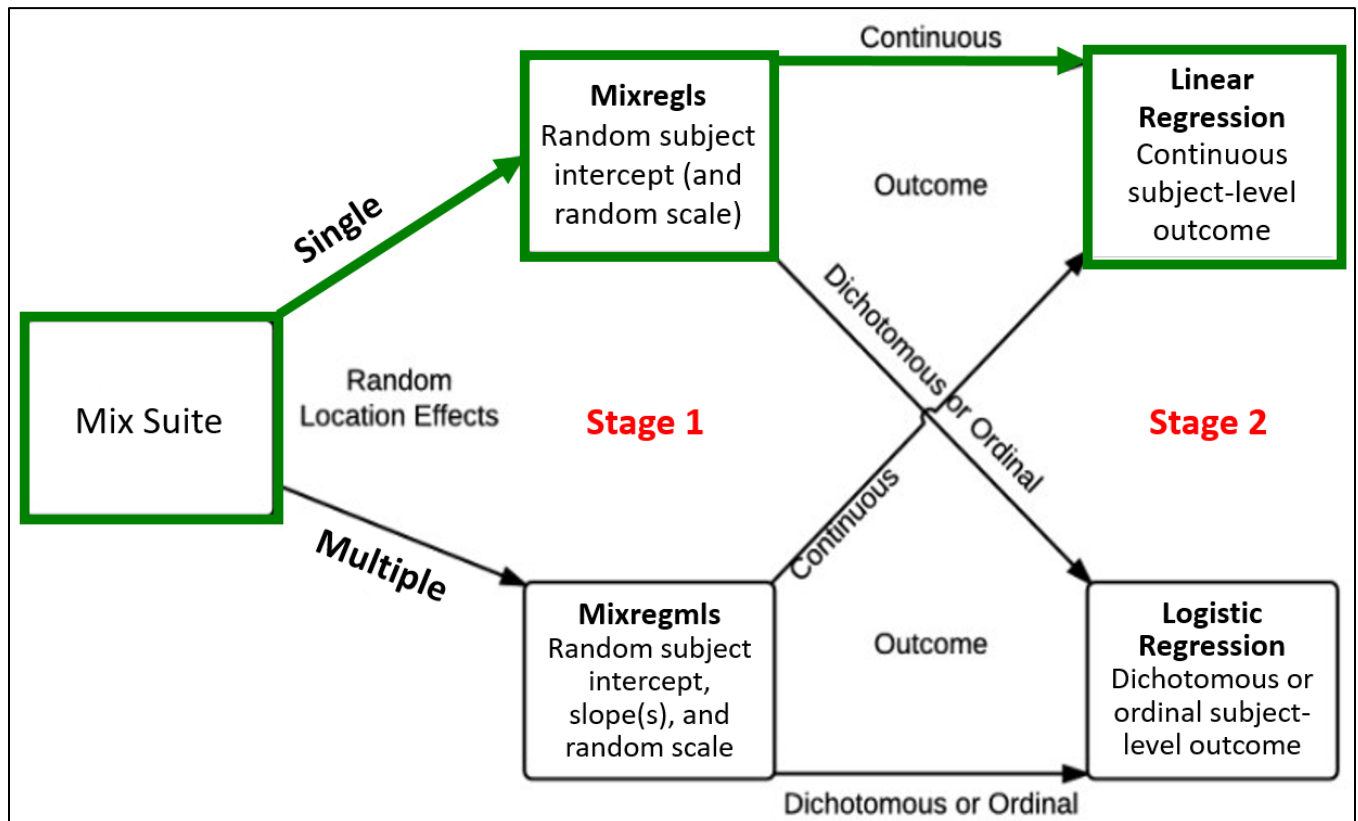

#### Example research questions for Mixregls-Linear Regression model

- Examine whether subject-level mean (i.e., random intercept or within-person mean) and subject level variance (i.e., random scale or degree of within-person / intraindividual variability) of momentary positive affect (within-subject, continuous, time-varying variable) predicts subject-level average sedentary hours per day (between-subject, continuous, time-invariant variable), after controlling for sex and day of week (DOW).
- Examine whether participants' age (between-subject, time-invariant variable) **moderates** the associations between participants' mean level (i.e., random intercept) and (i.e., random scale) variance in momentary positive affect in predicting subject-level average hours per day of sedentary behavior (between-subject, continuous, time-invariant variable), after controlling for sex and day of week (DOW).

**Stage 1 outcome variable:** Positive affect (time-varying)

**Stage 1 regressors:** Day of week (time-varying); Sex (time-invariant)

**Stage 2 outcome variable:** Average sedentary hours per day (time-invariant)

**Stage 2 regressors:** Age (time-invariant); Age x Random Intercept interaction; Age x Random Scale interaction

### 3.1. Step-by-step instructions on running Mixregls - Linear Regression model in MixWILD

1. Double-click on the MixWILD icon to open the main window.
2. Click on **“File”** and then select **“New Model”** (or use keyboard shortcut Ctrl + N).

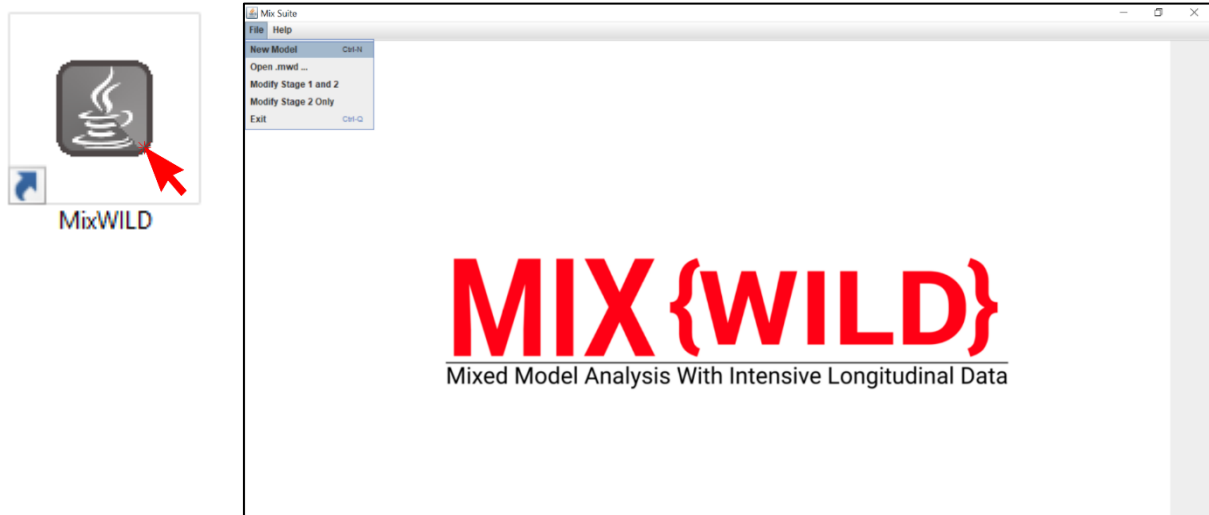

3. Click on **“Instructions”** to make sure your data are in the correct format.

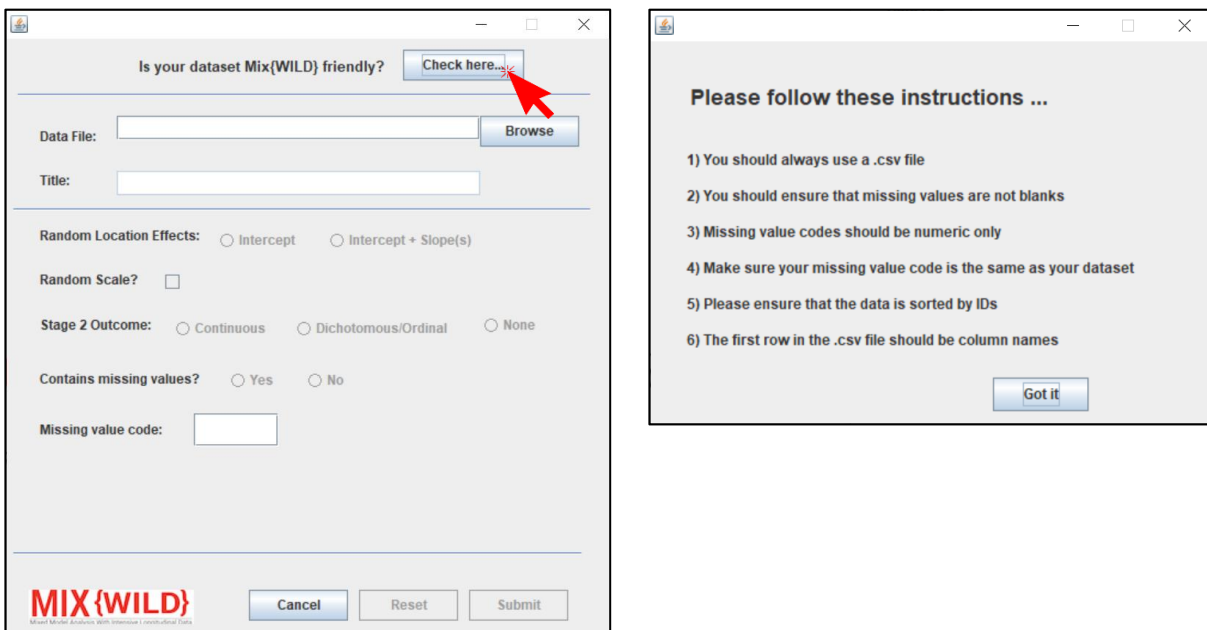

- Click on **“Browse”** to select the location of your data file (in .csv) and then click **“Open”**.

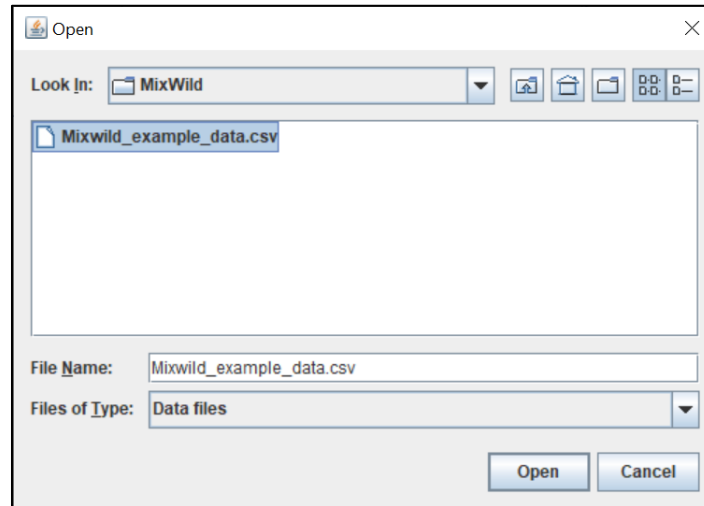

- Click on **“View Data”** to preview your data file to verify your data and format are correct.

| ID | AGE   | SEX | WEEKEND | DOW | OBESE | BMI   | NEG_AFFE... | POS_AFFE... | MVPA_daily... | SED_daily... |
|----|-------|-----|---------|-----|-------|-------|-------------|-------------|---------------|--------------|
| 1  | 10.47 | 1   | 0       | 0   | 1     | -4.79 | 40          | 27          | 38.19         | -999         |
| 1  | 10.47 | 1   | 0       | 1   | 1     | -4.79 | -999        | 30          | 38.19         | -999         |
| 1  | 10.47 | 1   | 0       | 1   | 1     | -4.79 | 50          | 35          | 38.19         | -999         |
| 1  | 10.47 | 1   | 1       | 5   | 1     | -4.79 | 10          | 38          | 38.19         | -999         |
| 1  | 10.47 | 1   | 0       | 1   | 1     | -4.79 | 35          | 43          | 38.19         | -999         |
| 1  | 10.47 | 1   | 1       | 5   | 1     | -4.79 | 40          | 44          | 38.19         | -999         |
| 1  | 10.47 | 1   | 0       | 1   | 1     | -4.79 | 10          | -999        | 38.19         | -999         |
| 1  | 10.47 | 1   | 0       | 0   | 1     | -4.79 | 20          | -999        | 38.19         | -999         |
| 1  | 10.47 | 1   | 0       | 0   | 1     | -4.79 | 30          | -999        | 38.19         | -999         |
| 1  | 10.47 | 1   | 0       | 0   | 1     | -4.79 | 40          | -999        | 38.19         | -999         |
| 1  | 10.47 | 1   | 1       | 5   | 1     | -4.79 | 40          | -999        | 38.19         | -999         |
| 2  | 20.47 | 1   | 0       | 3   | 1     | -4.79 | 52          | 15          | 22.03         | 9.46         |
| 2  | 20.47 | 1   | 0       | 2   | 1     | -4.79 | 39          | 17          | 22.03         | 9.46         |
| 2  | 20.47 | 1   | 0       | 3   | 1     | -4.79 | 49          | 22          | 22.03         | 9.46         |
| 2  | 20.47 | 1   | 1       | 6   | 1     | -4.79 | 50          | 22          | 22.03         | 9.46         |
| 2  | 20.47 | 1   | 1       | 6   | 1     | -4.79 | 59          | 24          | 22.03         | 9.46         |
| 2  | 20.47 | 1   | 1       | 5   | 1     | -4.79 | 30          | 33          | 22.03         | 9.46         |
| 2  | 20.47 | 1   | 1       | 6   | 1     | -4.79 | 20          | 35          | 22.03         | 9.46         |
| 2  | 20.47 | 1   | 0       | 4   | 1     | -4.79 | 10          | 38          | 22.03         | 9.46         |
| 2  | 20.47 | 1   | 1       | 6   | 1     | -4.79 | 40          | 39          | 22.03         | 9.46         |
| 2  | 20.47 | 1   | 1       | 6   | 1     | -4.79 | 41          | 44          | 22.03         | 9.46         |
| 2  | 20.47 | 1   | 1       | 5   | 1     | -4.79 | 50          | 46          | 22.03         | 9.46         |
| 2  | 20.47 | 1   | 0       | 4   | 1     | -4.79 | 50          | 48          | 22.03         | 9.46         |
| 2  | 20.47 | 1   | 1       | 5   | 1     | -4.79 | 40          | 49          | 22.03         | 9.46         |
| 2  | 20.47 | 1   | 1       | 5   | 1     | -4.79 | 40          | 49          | 22.03         | 9.46         |
| 2  | 20.47 | 1   | 0       | 4   | 1     | -4.79 | 50          | 51          | 22.03         | 9.46         |
| 2  | 20.47 | 1   | 0       | 2   | 1     | -4.79 | 10          | 52          | 22.03         | 9.46         |
| 2  | 20.47 | 1   | 0       | 0   | 1     | -4.79 | 50          | 59          | 22.03         | 9.46         |
| 2  | 20.47 | 1   | 0       | 0   | 1     | -4.79 | 30          | 62          | 22.03         | 9.46         |
| 2  | 20.47 | 1   | 1       | 5   | 1     | -4.79 | 40          | 65          | 22.03         | 9.46         |
| 2  | 20.47 | 1   | 1       | 5   | 1     | -4.79 | 20          | 66          | 22.03         | 9.46         |
| 3  | 17.47 | 1   | 0       | 2   | 1     | -4.79 | 61          | 15          | 22.03         | 9.46         |
| 3  | 17.47 | 1   | 0       | 4   | 1     | -4.79 | 38          | 22          | 22.03         | 9.46         |
| 3  | 17.47 | 1   | 1       | 6   | 1     | -4.79 | 60          | 25          | 22.03         | 9.46         |
| 3  | 17.47 | 1   | 0       | 2   | 1     | -4.79 | 33          | 38          | 22.03         | 9.46         |

6. Add title to your output files. This title name is later displayed in your output files.
7. Select “**Intercept**” from Random Location Effects specification for the subject-level mean and check “**Random Scale**” for subject-level variability
8. Select “**Continuous**” for the Stage 2 outcome.
9. Click on missing values if there are any in your dataset; specify the missing value code in the box (i.e., -999 in the example dataset).

Example

Is your dataset Mix{WILD} friendly?

---

Data File:

Title:

---

Random Location Effects:  Intercept  Intercept + Slope(s)

Random Scale?

Stage 2 Outcome:  Continuous  Dichotomous/Ordinal  None

Contains missing values?  Yes  No

Missing value code:

Set seed:

---

**MIX{WILD}**  
Mixed Model Analysis With Intensive Longitudinal Data

10. After you submit, the interface will take you to the page that enables you to configure your Stage 1 model.
11. On the Stage 1 configuration page, select your ID variable and positive affect as your Stage 1 outcome variable.
12. Specify the association between mean and within- subject (WS) variance of the outcome variable, which is the association of the random location and random scale effects. “**Linear Association**” is selected for the following example. For random scale models, a quadratic association is also possible.

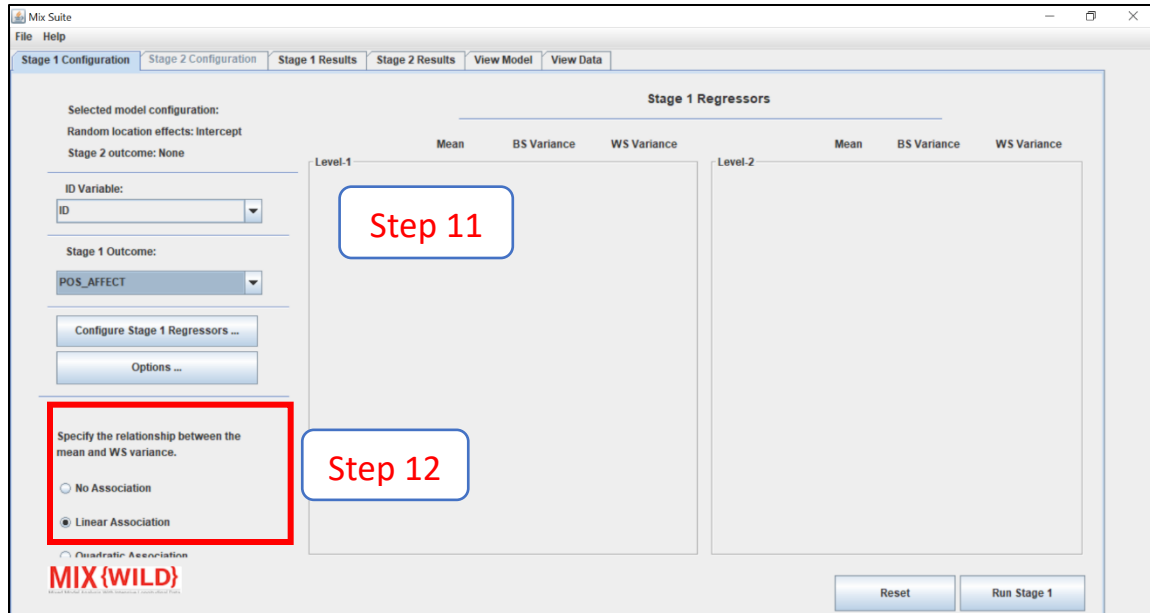

13. Click on “**Modify Stage 1 regressors**” to select other regressors.
14. Select and add time-varying regressor “**DOW**” and time-invariant regressor “**SEX**”.  
 (Note that for demonstration, day of the week (DOW) is treated as a linear regressor of positive affect. The user might want to instead treat this as a factor in the model by creating 6 dummy codes for the 7 days.)

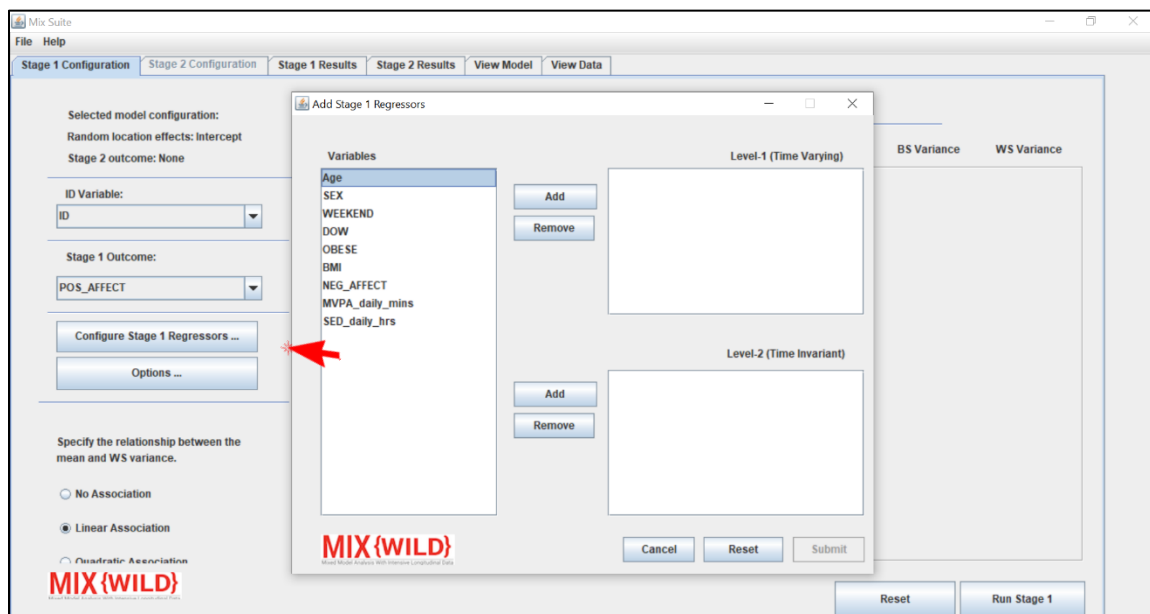

15. Select to allow Stage 1 regressors to predict mean, between-subject variance, and/or within-subject variance of Stage 1 outcome.

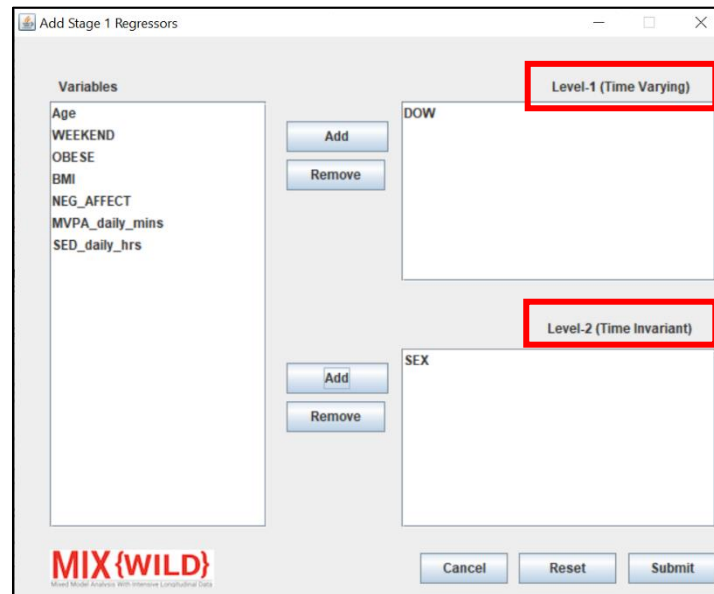

15. Select the boxes in the mean column, BS Variance column, and WS Variance column to allow Stage 1 regressors to predict the mean, between-subject variance, and/or within-subject variance of Stage 1 outcome, respectively. Day of week is select to predict the mean.
16. Select “**Disaggregate**” for each of the time-varying variable(s) for which decomposition of the within-subject and between-subject effects in predicting Stage 1 outcome is desired. Day of week is not aggregated in this example.

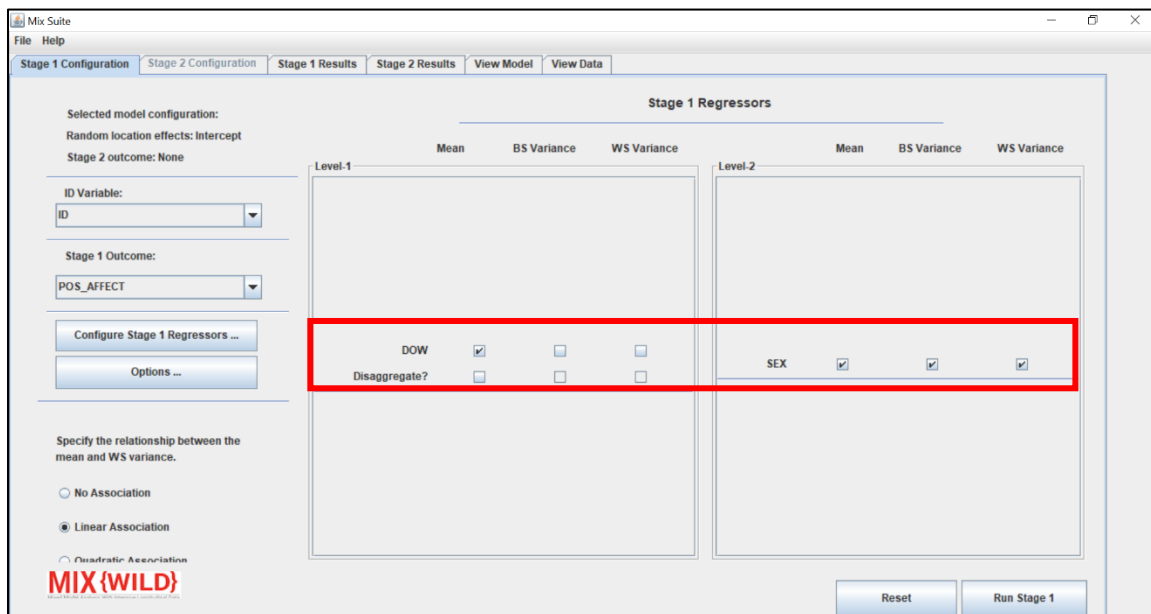

17. Click on “**Options**” to change other default settings if needed.
18. In most cases, Mean, BS and WS intercept should remain checked. Also, uncheck the “**Discard Subjects**” option to use all data for analysis.
19. By default, the estimated random effects of the Stage 1 analysis (i.e., random location and scale effects) are resampled 500 times in the Stage 2 analysis. Resampling is necessary because the random effects are estimated quantities that are entered as regressors in the Stage 2 model. (refer to the supplemental documents for further description of Options settings)

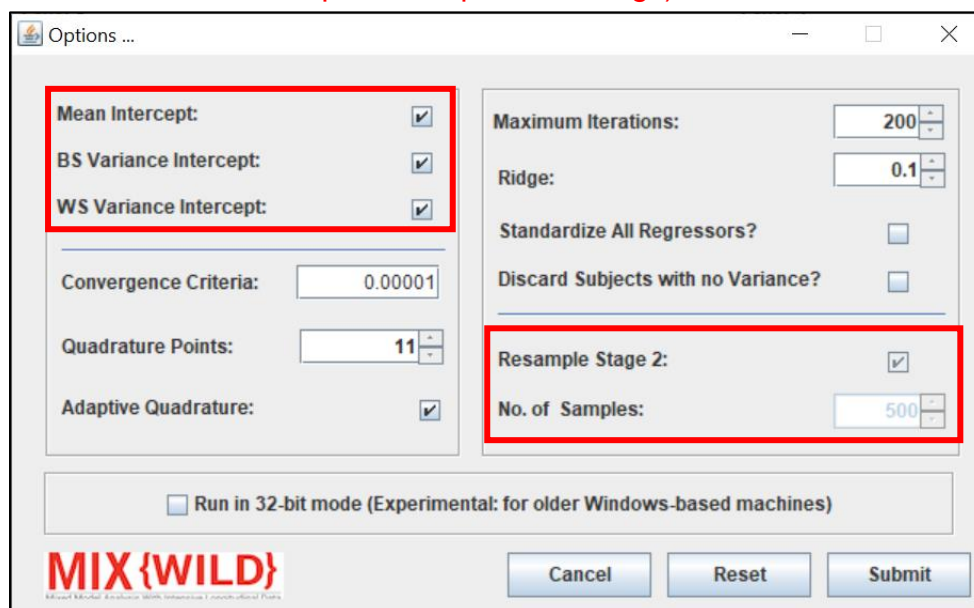

20. Click on “**Submit**” and then go to “**Configure Stage 2**”.

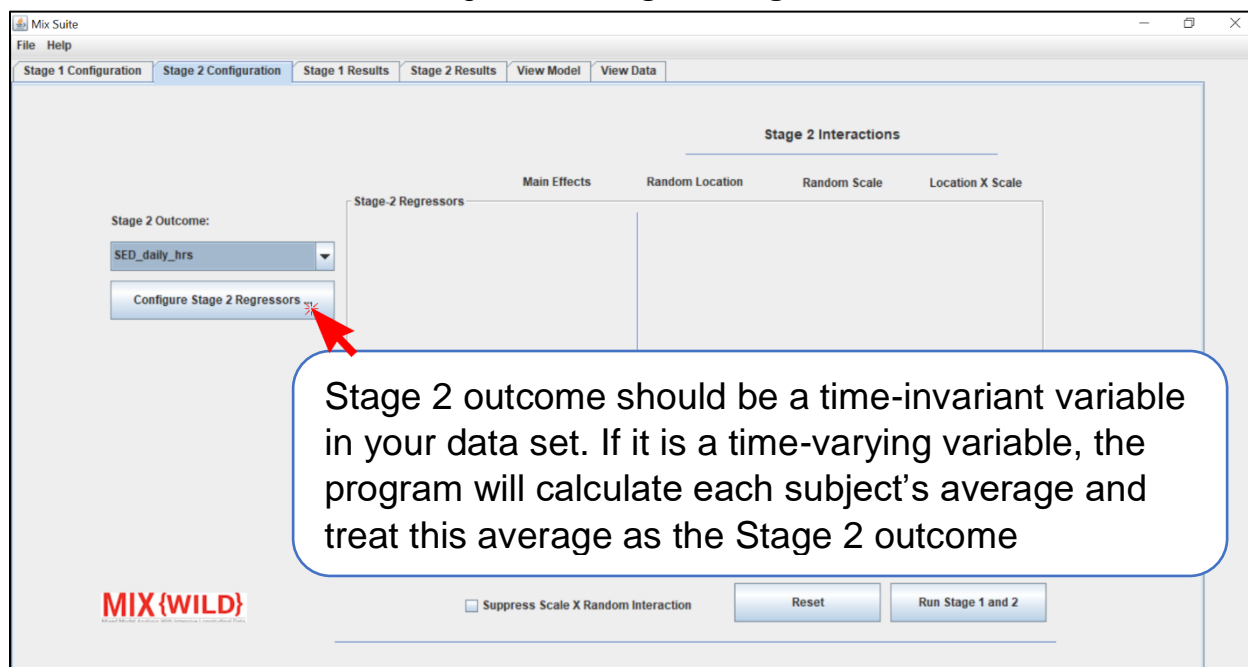

21. Select “**SED\_daily\_hours**” as Stage 2 outcome variable.
22. Add Stage 2 regressor(s) into the model. Stage 2 regressor(s) are also generally time-invariant variable(s), however if they are time-varying then the program will calculate subject averages of those variables. Click on “**Submit**” when finished.

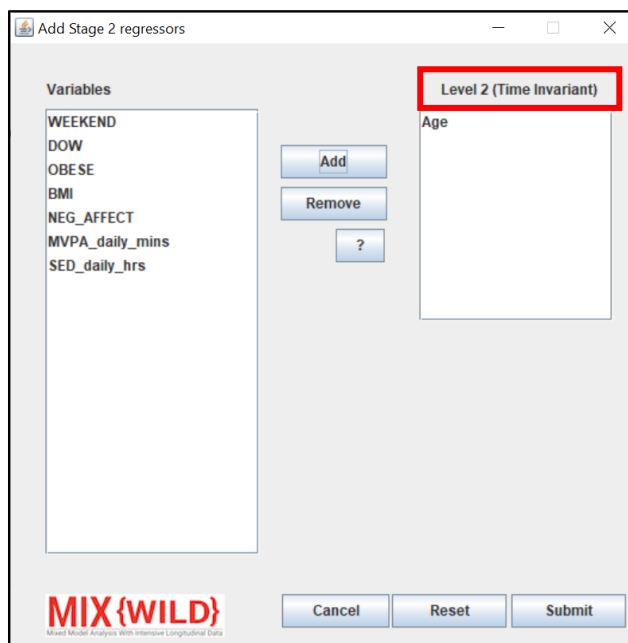

23. Select to add Stage 2 main effect(s) and interaction effect(s) with Stage 1 random effects as regressors. For example, by clicking the “**Location x Scale**” box, a 3-way interaction (AGE x Random location x Random scale) will be included to predict the Stage 2 outcome. This Location x Scale interaction option is enabled only if main effects are selected.

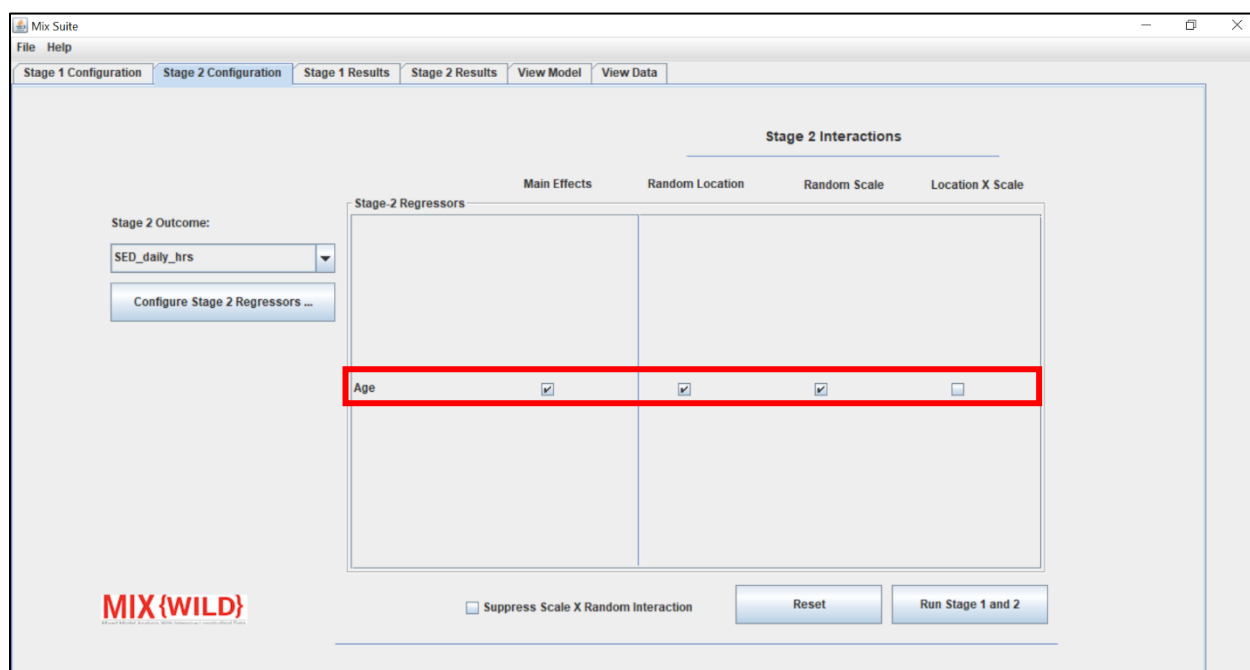



24. Click on Stage 1 and Stage 2 configurations to verify your model. Click on **“Run Stage 1 and 2”** to generate the definition file. The definition file contains the syntax that instructs the program to estimate the specified model.

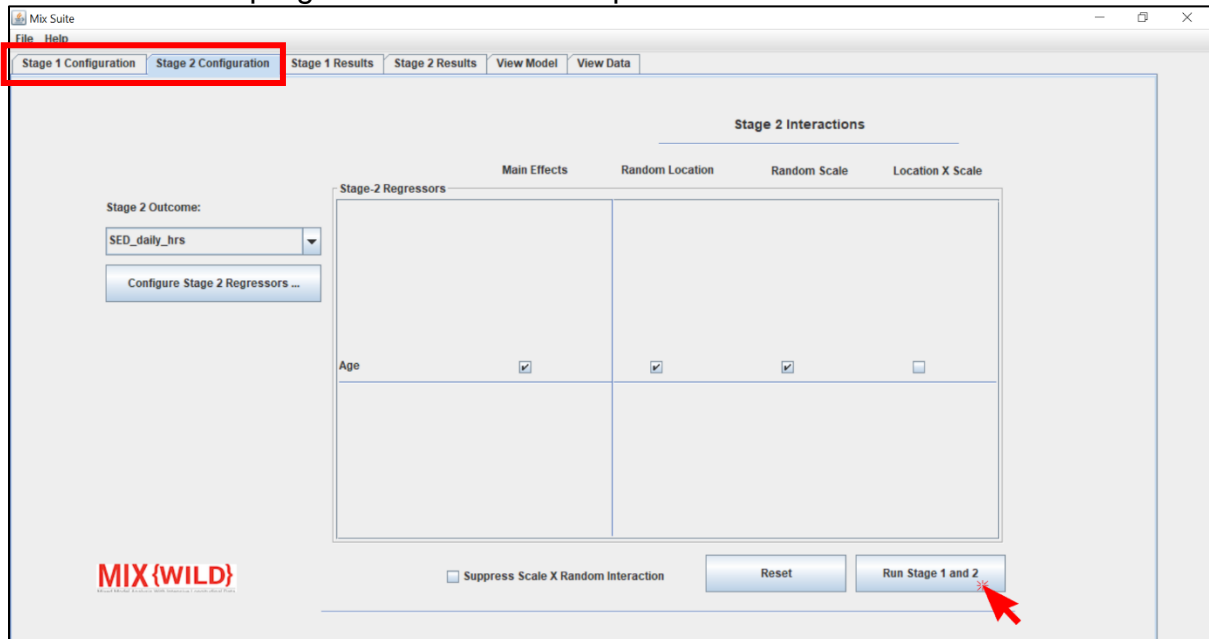

25. In the definition file, click on **“Proceed”** to run your model and generate model output files. If you see a field with the text **“null”**, it means that there is a mistake in your model specifications that should be fixed.

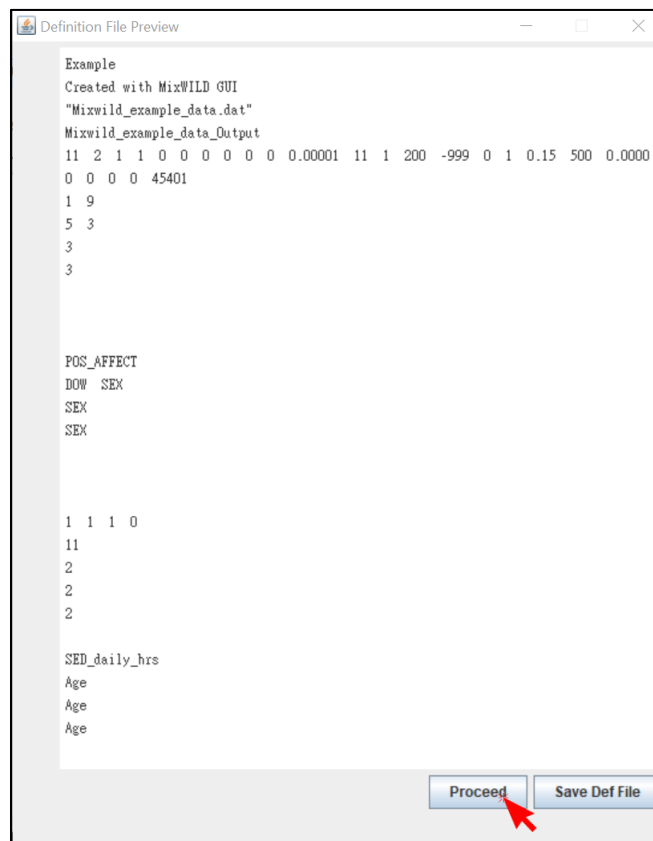

26. A window will appear while model estimation is in progress. The time for generating the final output depends on the dataset size and complication of your specified model. If your Stage 1 model has many regressors or if you select a large number for resampling, the run time could range up to 5 to 10 minutes.

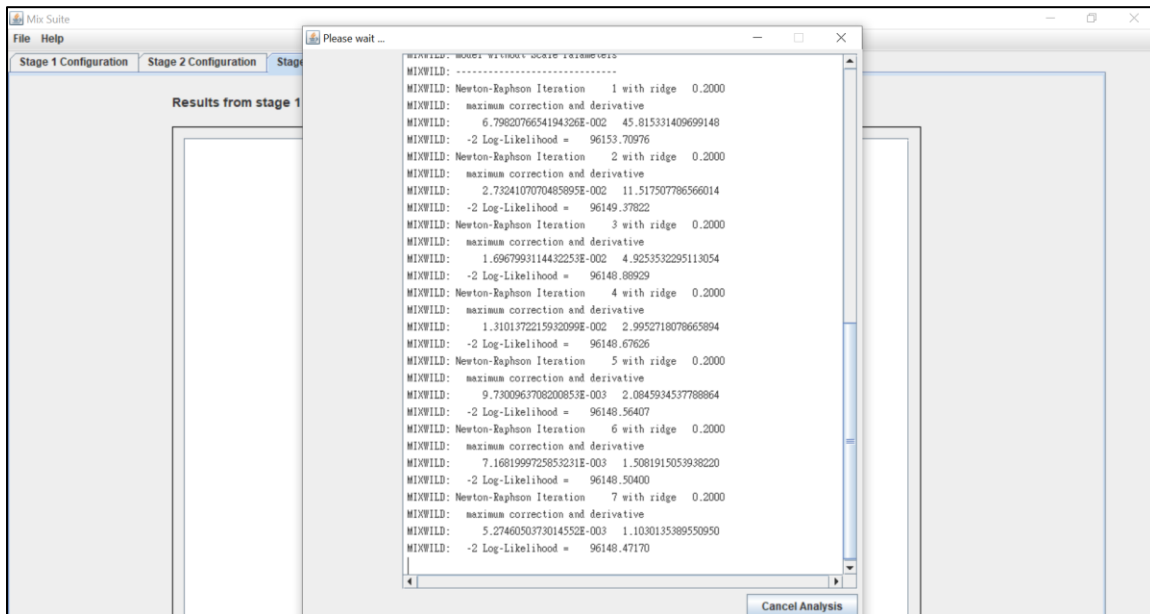

27. If the following warning message appears, it indicates that computational difficulties were encountered that prevented the model parameters from being estimated successfully. In this case, double-check the format of your dataset and your model specifications. Some suggestions for steps to take are listed in Appendix A.

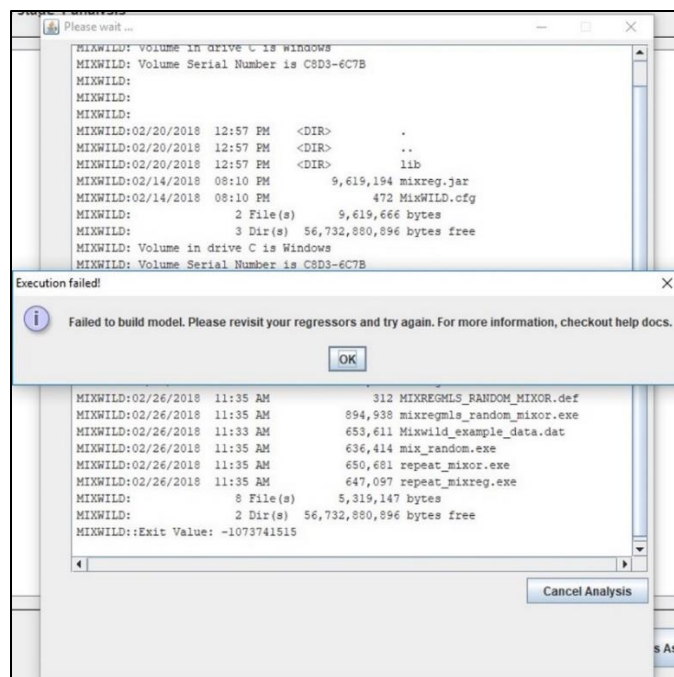

28. When estimation is completed, the Stage 1 and Stage 2 results can be seen by clicking the Stage 1 and Stage 2 Results boxes, respectively.

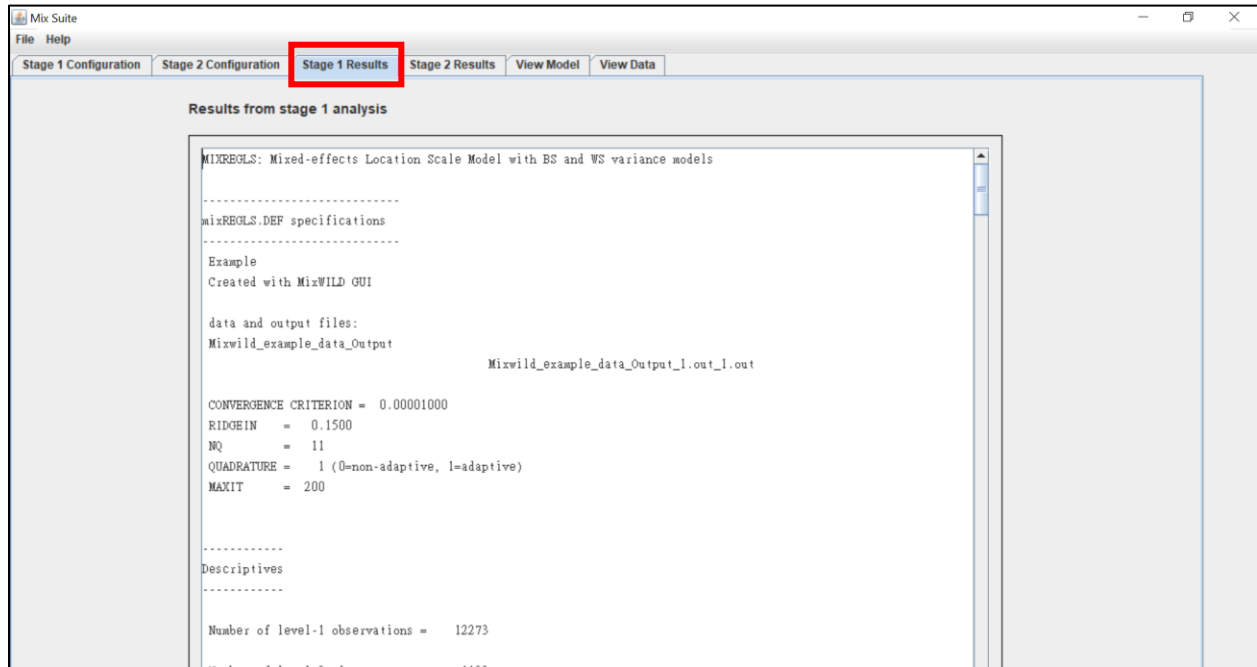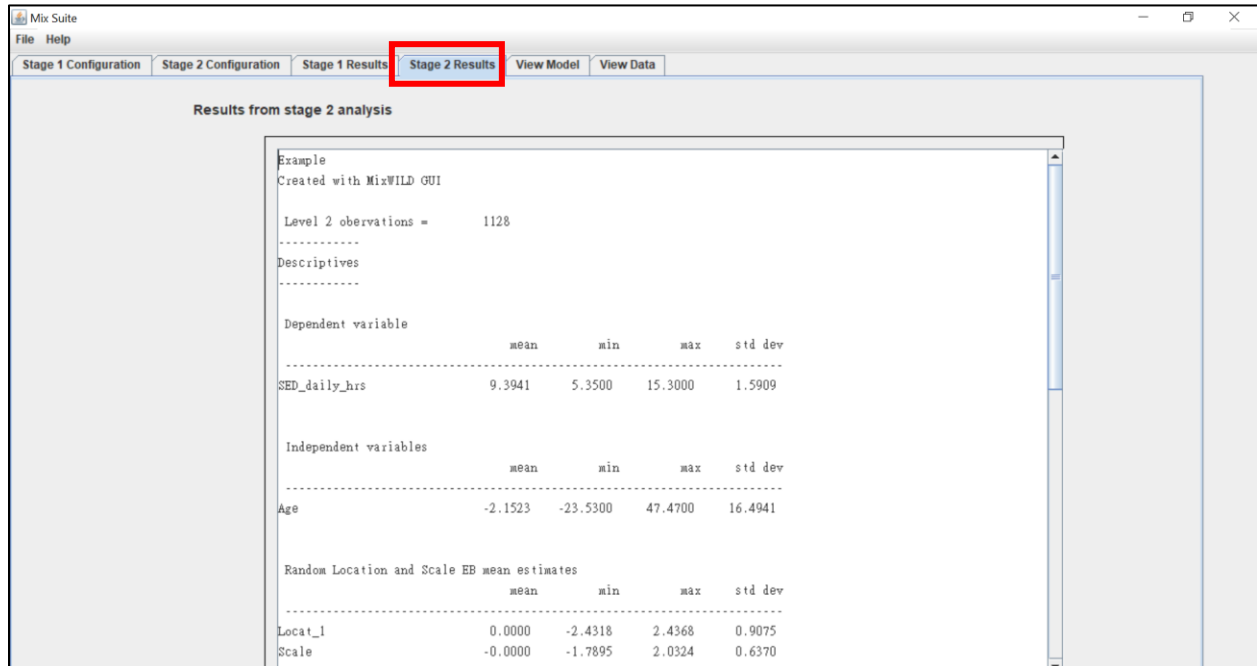

29. All files generated from the program can be found in a folder with the prefix MixWILD under the same directory of your dataset.

| MIXWILD              |                    |                                             |
|----------------------|--------------------|---------------------------------------------|
| Name                 | Date modified      | Type                                        |
| MIXWILD151988987     | 3/6/2018 5:39 PM   | File folder                                 |
| Mixwild_example_data | 2/26/2018 11:54 AM | Microsoft Excel Comma Separated Values File |

30. The OUT files with suffix `_1` and `_2` are the results that are identical in the Stage 1 and Stage 2 boxes in the MixWILD program.

| Name                                    | Date modified     | Type                 | Size      |
|-----------------------------------------|-------------------|----------------------|-----------|
| mix_random                              | 11/9/2017 4:45 PM | DEF File             | 1 KB      |
| mix_random                              | 11/9/2017 4:43 PM | Application          | 802 KB    |
| mixreg                                  | 11/9/2017 4:43 PM | Application          | 1,142 KB  |
| MIXREGLS_RANDOM_MIXREG                  | 11/9/2017 4:43 PM | DEF File             | 1 KB      |
| Mixwild_example_data                    | 11/9/2017 3:48 PM | Microsoft Excel C... | 1,148 KB  |
| Mixwild_example_data_Output             | 11/9/2017 4:43 PM | DEF File             | 1 KB      |
| Mixwild_example_data_Output_1           | 11/9/2017 4:45 PM | OUT File             | 15 KB     |
| Mixwild_example_data_Output_2           | 11/9/2017 4:54 PM | OUT File             | 3 KB      |
| Mixwild_example_data_Output_ebrando...  | 11/9/2017 4:45 PM | DAT File             | 11,029 KB |
| Mixwild_example_data_Output_ebvar.dat   | 11/9/2017 4:45 PM | DAT File             | 85 KB     |
| Mixwild_example_data_Output_level2.dat  | 11/9/2017 4:45 PM | DAT File             | 86 KB     |
| Mixwild_example_data_Output_random      | 11/9/2017 4:45 PM | DEF File             | 1 KB      |
| Mixwild_example_data_Output_random_...  | 11/9/2017 4:54 PM | OUT File             | 2 KB      |
| Mixwild_example_data_Output_repeat_m... | 11/9/2017 4:45 PM | DEF File             | 1 KB      |
| repeat_mixreg                           | 11/9/2017 4:45 PM | DEF File             | 1 KB      |
| repeat_mixreg                           | 11/9/2017 4:43 PM | Application          | 763 KB    |

31. The OUT files with suffix `_1` contains the results from Stage 1 model.

32. There are three sets of submodel results in output\_1: the first submodel does not include scale parameters, the second submodel includes scale parameters but not random scale parameters, and the third submodel includes both the scale and the random scale parameters.

33. A brief description of the results from the third submodel will be provided in the following section.

| Model without Scale Parameters                   |          |              |           |         |
|--------------------------------------------------|----------|--------------|-----------|---------|
| Total Iterations = 15                            |          |              |           |         |
| Final Ridge value = 0.0                          |          |              |           |         |
| Log Likelihood                                   | =        | -48074.154   |           |         |
| Akaike's Information Criterion                   | =        | -48080.154   |           |         |
| Schwarz's Bayesian Criterion                     | =        | -48095.238   |           |         |
| ==> multiplied by -2                             |          |              |           |         |
| Log Likelihood                                   | =        | 96148.308    |           |         |
| Akaike's Information Criterion                   | =        | 96160.308    |           |         |
| Schwarz's Bayesian Criterion                     | =        | 96190.477    |           |         |
| Variable                                         | Estimate | AsymStdError | z-value   | p-value |
| BETA (regression coefficients)                   |          |              |           |         |
| Intercept                                        | 42.57495 | 0.55102      | 77.26612  | 0.00000 |
| DOW                                              | 0.39721  | 0.04749      | 8.36346   | 0.00000 |
| SEX                                              | -0.72502 | 0.60446      | -1.19945  | 0.23035 |
| ALPHA (BS variance parameters: log-linear model) |          |              |           |         |
| Intercept                                        | 4.29050  | 0.09491      | 45.20633  | 0.00000 |
| SEX                                              | -0.20952 | 0.11272      | -1.85881  | 0.06305 |
| TAU (WS variance parameters: log-linear model)   |          |              |           |         |
| Intercept                                        | 4.83228  | 0.01339      | 360.98308 | 0.00000 |

  

| Model WITH Scale Parameters                      |          |              |           |         |
|--------------------------------------------------|----------|--------------|-----------|---------|
| Total Iterations = 19                            |          |              |           |         |
| Final Ridge value = 0.0                          |          |              |           |         |
| Log Likelihood                                   | =        | -48071.771   |           |         |
| Akaike's Information Criterion                   | =        | -48078.771   |           |         |
| Schwarz's Bayesian Criterion                     | =        | -48096.369   |           |         |
| ==> multiplied by -2                             |          |              |           |         |
| Log Likelihood                                   | =        | 96143.542    |           |         |
| Akaike's Information Criterion                   | =        | 96157.542    |           |         |
| Schwarz's Bayesian Criterion                     | =        | 96192.739    |           |         |
| Variable                                         | Estimate | AsymStdError | z-value   | p-value |
| BETA (regression coefficients)                   |          |              |           |         |
| Intercept                                        | 42.57119 | 0.55126      | 77.22558  | 0.00000 |
| DOW                                              | 0.40004  | 0.04750      | 8.42273   | 0.00000 |
| SEX                                              | -0.73211 | 0.60471      | -1.21067  | 0.22602 |
| ALPHA (BS variance parameters: log-linear model) |          |              |           |         |
| Intercept                                        | 4.28008  | 0.09600      | 44.58391  | 0.00000 |
| SEX                                              | -0.19562 | 0.11361      | -1.72189  | 0.08509 |
| TAU (WS variance parameters: log-linear model)   |          |              |           |         |
| Intercept                                        | 4.88403  | 0.02752      | 177.50260 | 0.00000 |
| SEX                                              | -0.06836 | 0.03150      | -2.17029  | 0.02999 |

  

| Model WITH RANDOM Scale                          |          |              |           |         |
|--------------------------------------------------|----------|--------------|-----------|---------|
| Total Iterations = 17                            |          |              |           |         |
| Final Ridge value = 0.0                          |          |              |           |         |
| Log Likelihood                                   | =        | -47914.216   |           |         |
| Akaike's Information Criterion                   | =        | -47923.216   |           |         |
| Schwarz's Bayesian Criterion                     | =        | -47945.843   |           |         |
| ==> multiplied by -2                             |          |              |           |         |
| Log Likelihood                                   | =        | 95828.432    |           |         |
| Akaike's Information Criterion                   | =        | 95846.432    |           |         |
| Schwarz's Bayesian Criterion                     | =        | 95891.686    |           |         |
| Variable                                         | Estimate | AsymStdError | z-value   | p-value |
| BETA (regression coefficients)                   |          |              |           |         |
| Intercept                                        | 42.57868 | 0.55031      | 77.37179  | 0.00000 |
| DOW                                              | 0.39158  | 0.04563      | 8.58138   | 0.00000 |
| SEX                                              | -0.73865 | 0.60904      | -1.21281  | 0.22520 |
| ALPHA (BS variance parameters: log-linear model) |          |              |           |         |
| Intercept                                        | 4.28473  | 0.09386      | 45.65031  | 0.00000 |
| SEX                                              | -0.14654 | 0.11109      | -1.31913  | 0.18713 |
| TAU (WS variance parameters: log-linear model)   |          |              |           |         |
| Intercept                                        | 4.78679  | 0.03843      | 124.56564 | 0.00000 |
| SEX                                              | -0.04782 | 0.04447      | -1.07528  | 0.28225 |
| Random scale standard deviation                  |          |              |           |         |
| Std Dev                                          | 0.40712  | 0.02080      | 19.57251  | 0.00000 |
| Random location (mean) effect on WS variance     |          |              |           |         |
| Loc Eff                                          | -0.14581 | 0.02253      | -6.47252  | 0.00000 |

34. The OUT file with suffix\_2 contains the results from Stage 2 model.

Mixwild\_example\_data\_Output\_2 - Notepad

File Edit Format View Help

Mixwild Example2  
Created with MixWILD GUI

Level 2 observations = 1128

-----

Descriptives

-----

| Dependent variable |        |        |         |         |
|--------------------|--------|--------|---------|---------|
|                    | mean   | min    | max     | std dev |
| SED_daily_hrs      | 9.3941 | 5.3500 | 15.3000 | 1.5909  |

-----

| Independent variables |         |          |         |         |
|-----------------------|---------|----------|---------|---------|
|                       | mean    | min      | max     | std dev |
| Age                   | -2.1523 | -23.5300 | 47.4700 | 16.4941 |

-----

| Random Location and Scale EB mean estimates |         |         |        |         |
|---------------------------------------------|---------|---------|--------|---------|
|                                             | mean    | min     | max    | std dev |
| Locat_1                                     | 0.0000  | -2.4318 | 2.4368 | 0.9075  |
| Scale                                       | -0.0000 | -1.7895 | 2.0324 | 0.6370  |
| Locat_1*Scale                               | -0.0242 | -3.3730 | 3.6866 | 0.6370  |

35. Location\_1 (random intercept) and Scale (random scale) main effects and their interaction (Location\_1\*Scale) are default regressors in Stage 2 model results.

-----

Final Results

-----

Average Log Likelihood = -2106.858 (sd= 0.712)

Akaike's Information Criterion = -2113.858

Schwarz's Bayesian Criterion = -2131.457

==> multiplied by -2

Log Likelihood = 4213.717

Akaike's Information Criterion = 4227.717

Schwarz's Bayesian Criterion = 4262.914

| Variable       | Estimate | AsymStdError | z-value   | p-value |
|----------------|----------|--------------|-----------|---------|
| Intercept      | 9.37372  | 0.06947      | 134.92350 | 0.00000 |
| Age            | 0.01798  | 0.00439      | 4.09480   | 0.00004 |
| Locat_1        | 0.07699  | 0.06590      | 1.16843   | 0.24263 |
| Locat_1*Age    | -0.00310 | 0.00360      | -0.85909  | 0.39029 |
| Scale          | 0.03241  | 0.08328      | 0.38913   | 0.69718 |
| Scale*Age      | -0.00030 | 0.00455      | -0.06596  | 0.94741 |
| Locat_1*Scale  | -0.00638 | 0.08802      | -0.07246  | 0.94224 |
| Resid.Variance | 2.45392  | 0.10338      | 23.73801  | 0.00000 |

## 4.2. Brief interpretation of the Mixregls - Linear Regression model results

### Stage 1 model with random scale parameters

| Model WITH RANDOM Scale                          |          |              |           |         |
|--------------------------------------------------|----------|--------------|-----------|---------|
| Variable                                         | Estimate | AsymStdError | z-value   | p-value |
| BETA (regression coefficients)                   |          |              |           |         |
| Intercept                                        | 42.56827 | 0.55150      | 77.18565  | 0.00000 |
| DOW                                              | 0.39107  | 0.04564      | 8.56896   | 0.00000 |
| SEX                                              | -0.75529 | 0.61028      | -1.23761  | 0.21586 |
| ALPHA (BS variance parameters: log-linear model) |          |              |           |         |
| Intercept                                        | 4.28374  | 0.09391      | 45.61507  | 0.00000 |
| SEX                                              | -0.14547 | 0.11116      | -1.30873  | 0.19063 |
| TAU (WS variance parameters: log-linear model)   |          |              |           |         |
| Intercept                                        | 4.78671  | 0.03845      | 124.50564 | 0.00000 |
| SEX                                              | -0.04727 | 0.04449      | -1.06250  | 0.28801 |
| Random scale standard deviation                  |          |              |           |         |
| Std Dev                                          | 0.40728  | 0.02081      | 19.57622  | 0.00000 |
| Random location (mean) effect on WS variance     |          |              |           |         |
| Loc Eff                                          | -0.14551 | 0.02253      | -6.45824  | 0.00000 |

- The Stage 1 model (with random scale) shows that “Day of week (DOW)” is positively related to positive affect (mean estimate=0.3911,  $p<.01$ ). People report higher positive affect when it is closer to weekend (0=Monday, 1=Tuesday,..., 6=Sunday). (As mentioned earlier, DOW is used as a linear regressor of positive affect for this example. Users might want to instead treat this as a factor in the regression model by creating 6 dummy codes for the 7 days).
- The Stage 1 model also shows that there is significant variability in scale across subjects, as the Std Dev for the Random scale (on the log scale) is estimated as 0.4073 ( $p<.001$ ). Therefore, individuals differ from each other in their degree of within-subject/intraindividual variability in positive affect.
- The Stage 1 model also shows that the random scale (i.e., within-subject/intraindividual variance) is negatively associated with the random intercept (i.e., within-subject mean), as indicated by the estimate for the Loc Eff for Random location (mean) effect on WS variance (estimate = -0.14551,  $p<.001$ ). Individuals with overall higher mean positive affect are *less erratic/more stable* in their positive affect responses. (Note that this result may be also due to a ceiling effect in the affect response scale).

## Stage 2 model with continuous subject-level outcome

| Final Results  |          |              |           |         |
|----------------|----------|--------------|-----------|---------|
| Variable       | Estimate | AsymStdError | z-value   | p-value |
| Intercept      | 9.37388  | 0.06878      | 136.29122 | 0.00000 |
| Age            | 0.01783  | 0.00467      | 3.81784   | 0.00013 |
| Locat_1        | 0.08217  | 0.06927      | 1.18612   | 0.23557 |
| Locat_1*Age    | -0.00307 | 0.00364      | -0.84282  | 0.39933 |
| Scale          | 0.04340  | 0.08158      | 0.53200   | 0.59473 |
| Scale*Age      | -0.00018 | 0.00502      | -0.03537  | 0.97178 |
| Locat_1*Scale  | -0.01308 | 0.09619      | -0.13600  | 0.89182 |
| Resid.Variance | 2.47808  | 0.10483      | 23.63836  | 0.00000 |

- In the Stage 2 final results table, *Locat\_1* refers to the effect of the random intercept (i.e., within-subject mean) on average hours per day of sedentary behavior; *Scale* refers to the effect of random scale (i.e., within-subject variance) on average hours per day of sedentary behavior; and *Locat\_1\*Scale* is the interaction between random intercept and random scale predicting average hours per day of sedentary behavior.
- After controlling for other variables in the model, this linear regression model shows that “Age” is positively related to average hours per day of sedentary behavior (estimate=0.0178,  $p<.001$ ), indicating that older subjects spend more time being sedentary.
- The interaction between Age and the Random Intercept and the interaction between Age and Random Scale do not predict individuals’ average hours per day of sedentary behavior.
- Also, the random intercept (i.e., within-subject mean), random scale (i.e., within-subject variance), and their interaction do not predict individuals’ average hour per day of sedentary behavior.

### Note:

1. In these output files, the numbers of level 1 and level 2 observations correspond to the available non-missing observations of level 1 and level 2 variables included in the model(s).
2. For a given run, the program includes observations that have non-missing data for the outcomes (both Stage 1 and Stage 2), and all regressors (both Stage 1 and Stage 2) included in that particular run. Thus, the program uses all available data for a given run.
3. Refer to the supplemental documents for more detailed explanation of the Stage 1 and Stage 2 model results.



## 4. Example 3: Running Mixregls- Logistic Regression model in MixWILD

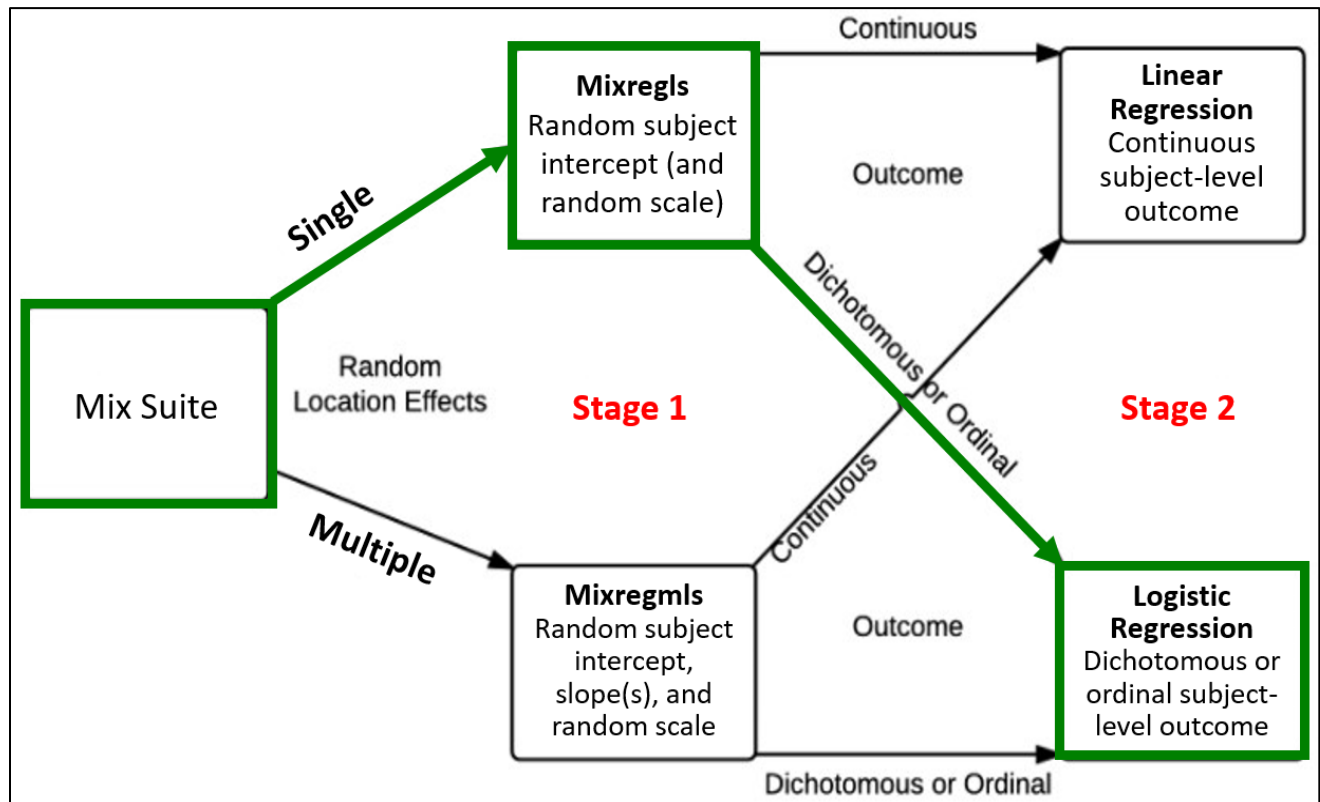

### Example research question for Mixregls-Logistic Regression model

- Examine whether subject-level mean (i.e., random intercept or within-person mean) and subject level variance (i.e., random scale or degree of within-subject/intraindividual variability) of momentary positive affect (within-subject, continuous, time-varying variable) predict subject-level obesity risk (between-subject, dichotomous, time invariant variable).

**Stage 1 outcome variable:** Positive affect (time varying)

**Stage 1 regressors:** None (an empty model)

**Stage 2 outcome variable:** Obese vs Non-obese (time invariant)

**Stage 2 regressors:** Random intercept; Random scale; Random intercept x Random scale interaction (these are all default regressors in Stage 2 model results)

## 4.1. Step-by-step instructions on running Mixregls-Logistic regression model in MixWILD

1. Double-click on the MixWILD icon to open the main window.
2. Click on **“File”** and then select **“New Model”** (or use keyboard shortcut Ctrl + N).

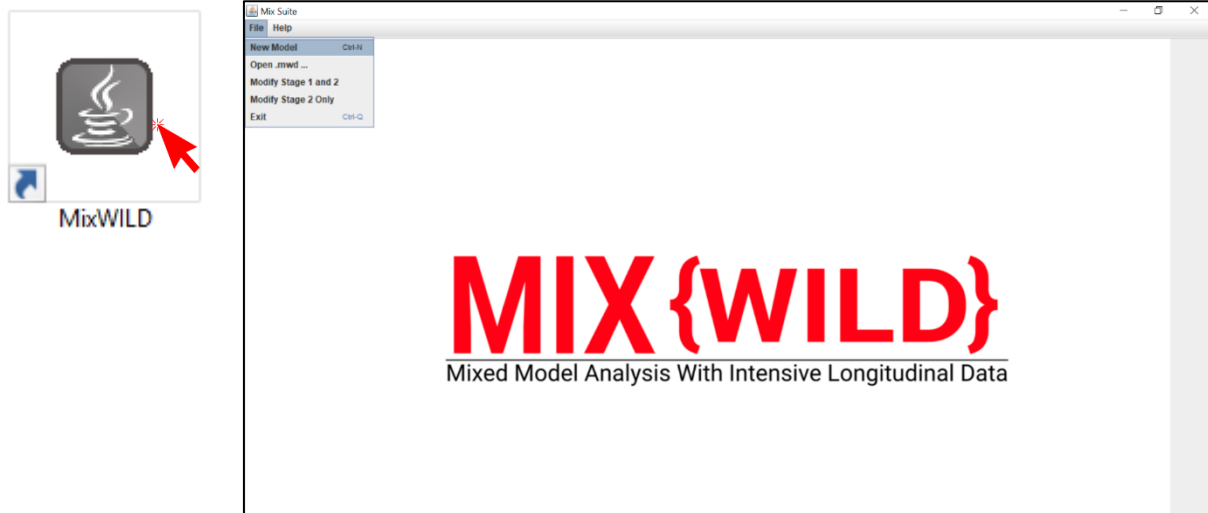

3. Click on **“Instructions”** to make sure your data are in the correct format.

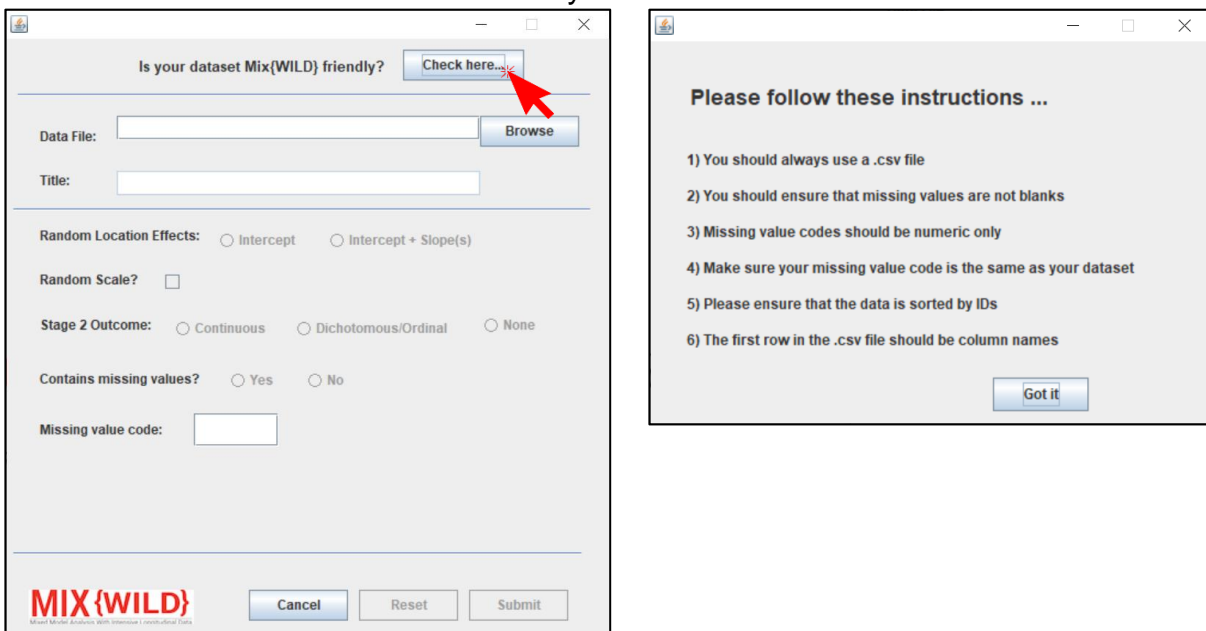

4. Click on **“Browse”** to select the location of your data file (in .csv) and then click **“Open”**.

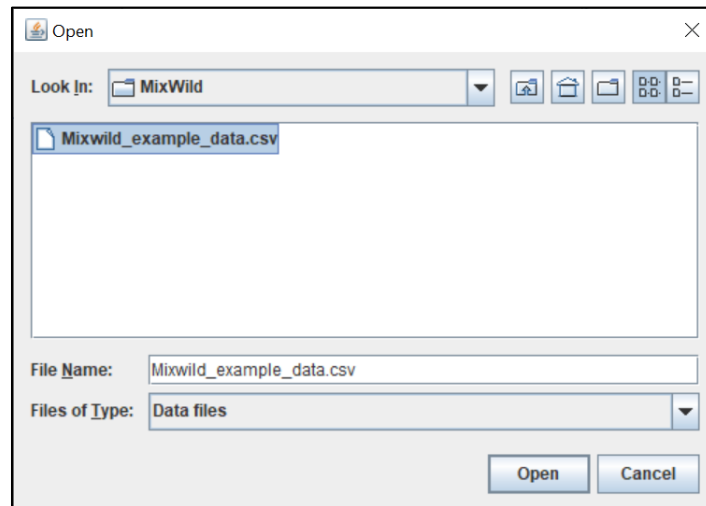

5. Click on **“View Data”** to preview your data file to verify your data and format are correct.

| ID | AGE   | SEX | WEEKEND | DOW | OBESE | BMI   | NEG_AFFE | POS_AFFE | MVPA_daily | SED_daily |
|----|-------|-----|---------|-----|-------|-------|----------|----------|------------|-----------|
| 1  | 10.47 | 1   | 0       | 0   | 1     | -4.79 | 40       | 27       | 38.19      | -999      |
| 1  | 10.47 | 1   | 0       | 1   | 1     | -4.79 | -999     | 30       | 38.19      | -999      |
| 1  | 10.47 | 1   | 0       | 1   | 1     | -4.79 | 50       | 35       | 38.19      | -999      |
| 1  | 10.47 | 1   | 1       | 5   | 1     | -4.79 | 10       | 38       | 38.19      | -999      |
| 1  | 10.47 | 1   | 0       | 1   | 1     | -4.79 | 35       | 43       | 38.19      | -999      |
| 1  | 10.47 | 1   | 1       | 5   | 1     | -4.79 | 40       | 44       | 38.19      | -999      |
| 1  | 10.47 | 1   | 0       | 1   | 1     | -4.79 | 10       | -999     | 38.19      | -999      |
| 1  | 10.47 | 1   | 0       | 0   | 1     | -4.79 | 20       | -999     | 38.19      | -999      |
| 1  | 10.47 | 1   | 0       | 0   | 1     | -4.79 | 30       | -999     | 38.19      | -999      |
| 1  | 10.47 | 1   | 0       | 0   | 1     | -4.79 | 40       | -999     | 38.19      | -999      |
| 1  | 10.47 | 1   | 1       | 5   | 1     | -4.79 | 40       | -999     | 38.19      | -999      |
| 2  | 20.47 | 1   | 0       | 3   | 1     | -4.79 | 52       | 15       | 22.03      | 9.46      |
| 2  | 20.47 | 1   | 0       | 2   | 1     | -4.79 | 39       | 17       | 22.03      | 9.46      |
| 2  | 20.47 | 1   | 0       | 3   | 1     | -4.79 | 49       | 22       | 22.03      | 9.46      |
| 2  | 20.47 | 1   | 1       | 6   | 1     | -4.79 | 50       | 22       | 22.03      | 9.46      |
| 2  | 20.47 | 1   | 1       | 6   | 1     | -4.79 | 59       | 24       | 22.03      | 9.46      |
| 2  | 20.47 | 1   | 1       | 5   | 1     | -4.79 | 30       | 33       | 22.03      | 9.46      |
| 2  | 20.47 | 1   | 1       | 6   | 1     | -4.79 | 20       | 35       | 22.03      | 9.46      |
| 2  | 20.47 | 1   | 0       | 4   | 1     | -4.79 | 10       | 38       | 22.03      | 9.46      |
| 2  | 20.47 | 1   | 1       | 6   | 1     | -4.79 | 40       | 39       | 22.03      | 9.46      |
| 2  | 20.47 | 1   | 1       | 6   | 1     | -4.79 | 41       | 44       | 22.03      | 9.46      |
| 2  | 20.47 | 1   | 1       | 5   | 1     | -4.79 | 50       | 46       | 22.03      | 9.46      |
| 2  | 20.47 | 1   | 0       | 4   | 1     | -4.79 | 50       | 48       | 22.03      | 9.46      |
| 2  | 20.47 | 1   | 1       | 5   | 1     | -4.79 | 40       | 49       | 22.03      | 9.46      |
| 2  | 20.47 | 1   | 1       | 5   | 1     | -4.79 | 40       | 49       | 22.03      | 9.46      |
| 2  | 20.47 | 1   | 0       | 4   | 1     | -4.79 | 50       | 51       | 22.03      | 9.46      |
| 2  | 20.47 | 1   | 0       | 2   | 1     | -4.79 | 10       | 52       | 22.03      | 9.46      |
| 2  | 20.47 | 1   | 0       | 0   | 1     | -4.79 | 50       | 59       | 22.03      | 9.46      |
| 2  | 20.47 | 1   | 0       | 0   | 1     | -4.79 | 30       | 62       | 22.03      | 9.46      |
| 2  | 20.47 | 1   | 1       | 5   | 1     | -4.79 | 40       | 65       | 22.03      | 9.46      |
| 2  | 20.47 | 1   | 1       | 5   | 1     | -4.79 | 20       | 66       | 22.03      | 9.46      |
| 3  | 17.47 | 1   | 0       | 2   | 1     | -4.79 | 61       | 15       | 22.03      | 9.46      |
| 3  | 17.47 | 1   | 0       | 4   | 1     | -4.79 | 38       | 22       | 22.03      | 9.46      |
| 3  | 17.47 | 1   | 1       | 6   | 1     | -4.79 | 60       | 25       | 22.03      | 9.46      |
| 3  | 17.47 | 1   | 0       | 2   | 1     | -4.79 | 33       | 38       | 22.03      | 9.46      |

6. Add title to your output files.
7. Select “**Intercept**” from Random Location Effects specification for subject-level mean. Select “**Random Scale**” for subject-level variability.
8. Select “**Dichotomous/Ordinal**” for Stage 2 outcome.
9. Click on missing values if there are any in your dataset; specify the missing value code in the box (i.e., -999 in the example dataset).

Is your dataset Mix{WILD} friendly? [Check here...](#)

Data File: C:\Users\donts\Documents\Mixwild\_example\_data.csv [Browse](#)

Title: Example

Random Location Effects:  Intercept  Intercept + Slope(s)

Random Scale?

Stage 2 Outcome:  Continuous  Dichotomous/Ordinal  None

Contains missing values?  Yes  No

Missing value code: -999

Set seed: 9606

**MIX {WILD}**  
Mixed Model Analysis With Intensive Longitudinal Data

[Cancel](#) [Reset](#) [Submit](#)

10. After you submit, the interface will take you to the page that enables you to configure your Stage 1 model.

Mix Suite

File Help

Stage 1 Configuration Stage 2 Configuration Stage 1 Results Stage 2 Results View Model View Data

Selected model configuration:  
Random location effects: Intercept  
Stage 2 outcome: Dichotomous

ID Variable:  
ID

Stage 1 Outcome:  
POS\_AFFECT

[Configure Stage 1 Regressors ...](#)  
[Options ...](#)

Specify the relationship between the mean and WS variance.

No Association  
 Linear Association  
 Quadratic Association

**MIX {WILD}**  
Mixed Model Analysis With Intensive Longitudinal Data

Stage 1 Regressors

|         | Mean | BS Variance | WS Variance |         | Mean | BS Variance | WS Variance |
|---------|------|-------------|-------------|---------|------|-------------|-------------|
| Level-1 |      |             |             | Level-2 |      |             |             |

[Reset](#) [Configure Stage 2](#)

11. On the Stage 1 configuration page, select your ID variable and positive affect (a time-varying variable) as your Stage 1 outcome variable.
12. Specify the association between the mean and within- subject (WS) variance, which is the association of the random location and random scale effects. **“Linear Association”** is selected for this example. For random scale models, a quadratic association is also possible.

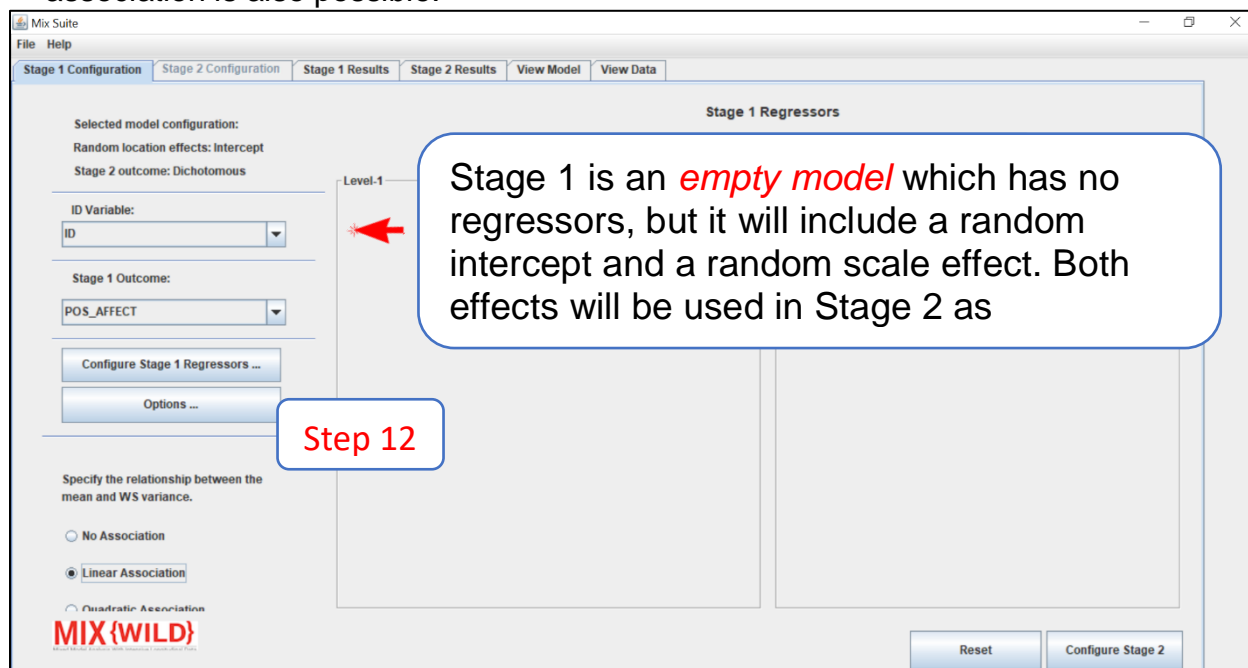

13. Click on **“Options”** to change other default settings if needed.
14. By default, the estimated random effects of the Stage 1 analysis (i.e., random location and scale effects) are resampled 500 times in the Stage 2 analysis. Resampling is necessary because the random effects are estimated quantities that are entered as regressors in the Stage 2 model.
15. Leave **“Discard Subjects”** unchecked, so we do not drop participants who have 0 variation in their Stage 1 outcome variable. Click on **“Submit”**

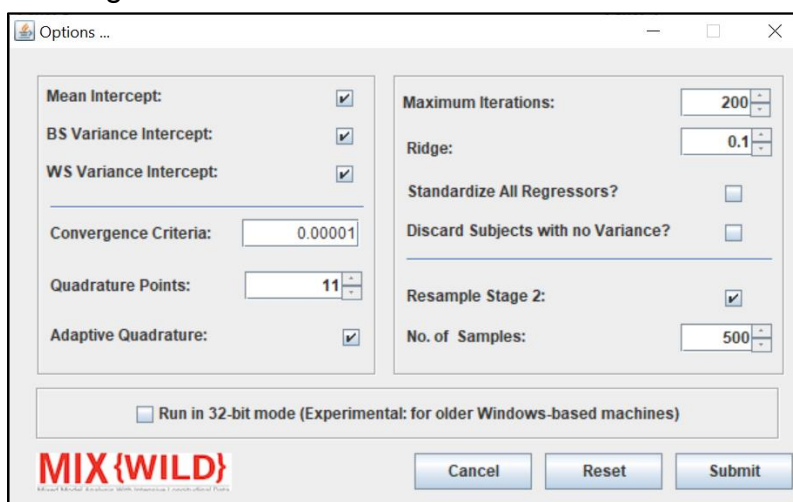

(Refer to the supplemental documents for further description of Options settings)

16. In “**Configure Stage 2**”, select Stage 2 outcome variable. It should be a **dichotomous or ordinal time-invariant variable** from your data set.

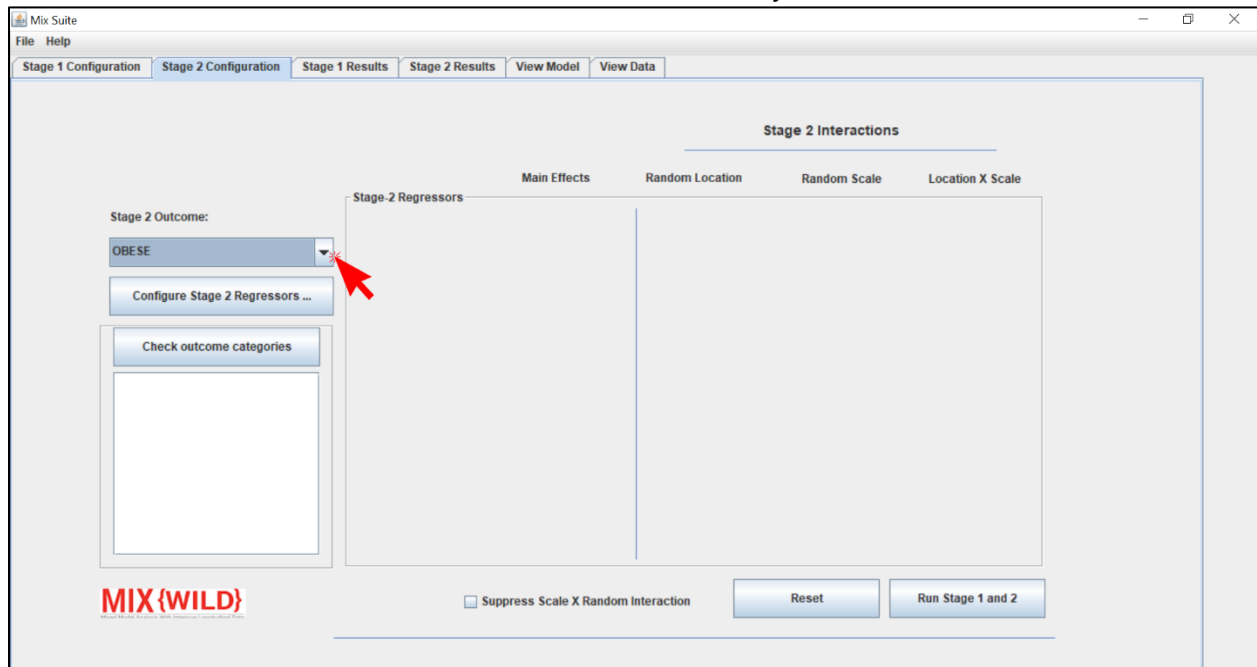

17. Select “**Obese**” as the Stage 2 outcome variable and check if the outcome categories are correct.

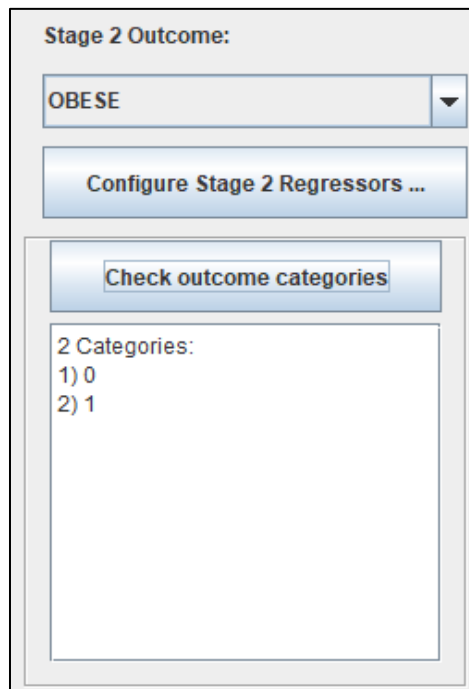

18. Stage 2 also has **no regressors**, so you don’t need to click on the “Configure Stage 2 Regressors” button. The random intercept, random scale, and the random intercept x random scale interaction will be included as default regressors in Stage 2.

19. Click on Stage 1 and Stage 2 configurations to double-check your model. Click on **“Run Stage 1 and 2”** to generate the definition file.

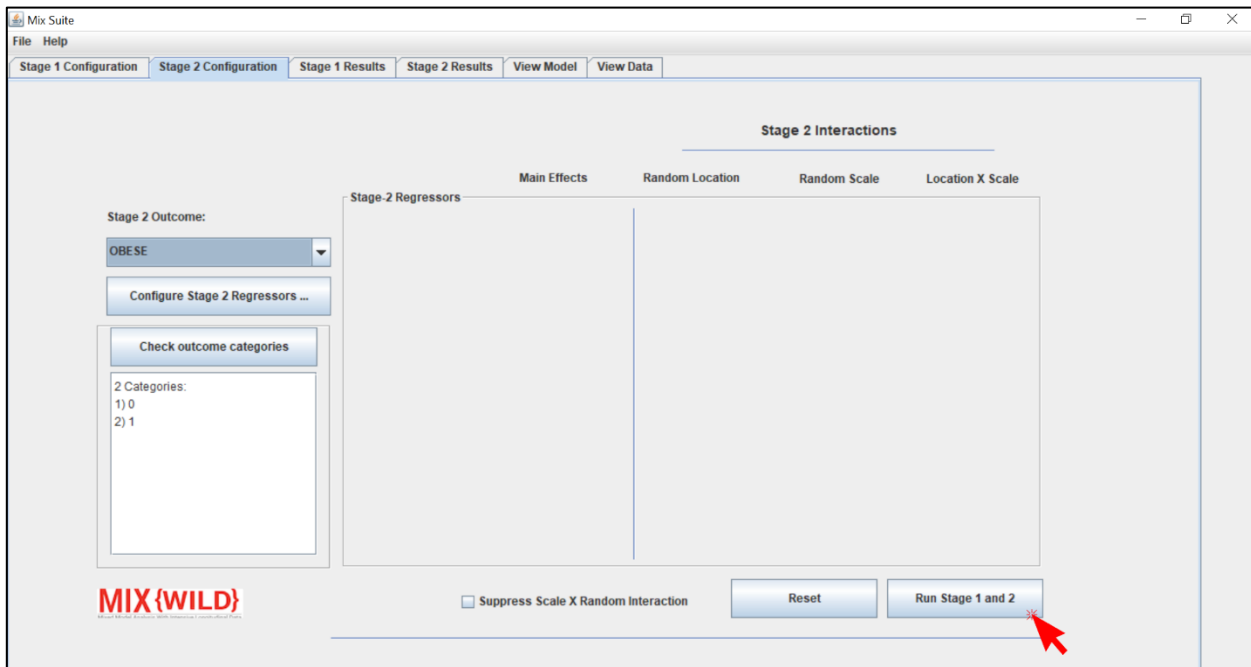

20. The definition file contains the syntax that instructs the program to estimate the specified model. In the definition file, click on **“Proceed”** to run your model and generate model output files.

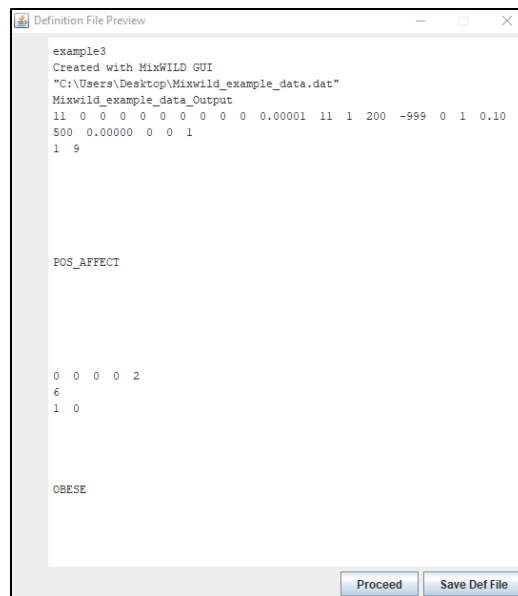

21. A window will appear while model estimation is in progress.

```

Please wait ...
MIXWILD: 2.3978102162017833E-002 107.65379534368694
MIXWILD: -2 Log-Likelihood = 103697.91955
MIXWILD: Newton-Raphson Iteration 3 with ridge 0.3000
MIXWILD: maximum correction and derivative
MIXWILD: 2.0330861695070410E-002 75.282248805403427
MIXWILD: -2 Log-Likelihood = 103693.05841
MIXWILD: Newton-Raphson Iteration 4 with ridge 0.3000
MIXWILD: maximum correction and derivative
MIXWILD: 1.7061945537560328E-002 51.967185277877817
MIXWILD: -2 Log-Likelihood = 103690.23417
MIXWILD: Newton-Raphson Iteration 5 with ridge 0.3000
MIXWILD: maximum correction and derivative
MIXWILD: 1.3671101042575516E-002 35.10584969625281
MIXWILD: -2 Log-Likelihood = 103688.62898
MIXWILD: Newton-Raphson Iteration 6 with ridge 0.3000
MIXWILD: maximum correction and derivative
MIXWILD: 2.0277091325247382E-002 23.049333968927098
MIXWILD: -2 Log-Likelihood = 103687.77382
MIXWILD: Newton-Raphson Iteration 7 with ridge 0.3000
MIXWILD: maximum correction and derivative
MIXWILD: 6.5627262123434844E-003 7.0160429102150887
MIXWILD: -2 Log-Likelihood = 103687.12457
MIXWILD: Newton-Raphson Iteration 8 with ridge 0.3000
MIXWILD: maximum correction and derivative
MIXWILD: 1.5565980656081001E-003 2.767626554315434
MIXWILD: -2 Log-Likelihood = 103687.06306
MIXWILD: Newton-Raphson Iteration 9 with ridge 0.3000
MIXWILD: maximum correction and derivative
MIXWILD: 3.5812968218833880E-004 1.0903124122934118
MIXWILD: -2 Log-Likelihood = 103687.05919
Cancel Analysis
  
```

22. If the following warning message appears, it indicates that computational difficulties were encountered and prevented the model parameters from being estimated successfully. In this case, double-check the format of your dataset and your model specifications. Some suggestions for steps to take are listed in Appendix A.

```

Please wait ...
MIXWILD: Volume in drive C is windows
MIXWILD: Volume Serial Number is C8D3-6C7B
MIXWILD:
MIXWILD:
MIXWILD:
MIXWILD:02/20/2018 12:57 PM <DIR> .
MIXWILD:02/20/2018 12:57 PM <DIR> ..
MIXWILD:02/20/2018 12:57 PM <DIR> lib
MIXWILD:02/14/2018 08:10 PM          9,619,194 mixreg.jar
MIXWILD:02/14/2018 08:10 PM           472 MixWILD.cfg
MIXWILD:          2 File(s)    9,619,666 bytes
MIXWILD:          3 Dir(s)    56,732,880,896 bytes free
MIXWILD: Volume in drive C is Windows
MIXWILD: Volume Serial Number is C8D3-6C7B
Execution failed!
Failed to build model. Please revisit your regressors and try again. For more information, checkout help docs.
OK
MIXWILD:02/26/2018 11:35 AM          312 MIXREGMLS_RANDOM_MIXOR.def
MIXWILD:02/26/2018 11:35 AM    894,938 mixregmls_random_mixor.exe
MIXWILD:02/26/2018 11:33 AM    653,611 Mixwild_example_data.dat
MIXWILD:02/26/2018 11:35 AM    636,414 mix_random.exe
MIXWILD:02/26/2018 11:35 AM    650,681 repeat_mixor.exe
MIXWILD:02/26/2018 11:35 AM    647,097 repeat_mixreg.exe
MIXWILD:          8 File(s)    5,319,147 bytes
MIXWILD:          2 Dir(s)    56,732,880,896 bytes free
MIXWILD: :Exit Value: -1073741515
Cancel Analysis
  
```



23. When estimation is completed, the Stage 1 and Stage 2 results can be seen by clicking the Stage 1 and Stage 2 Results boxes, respectively.

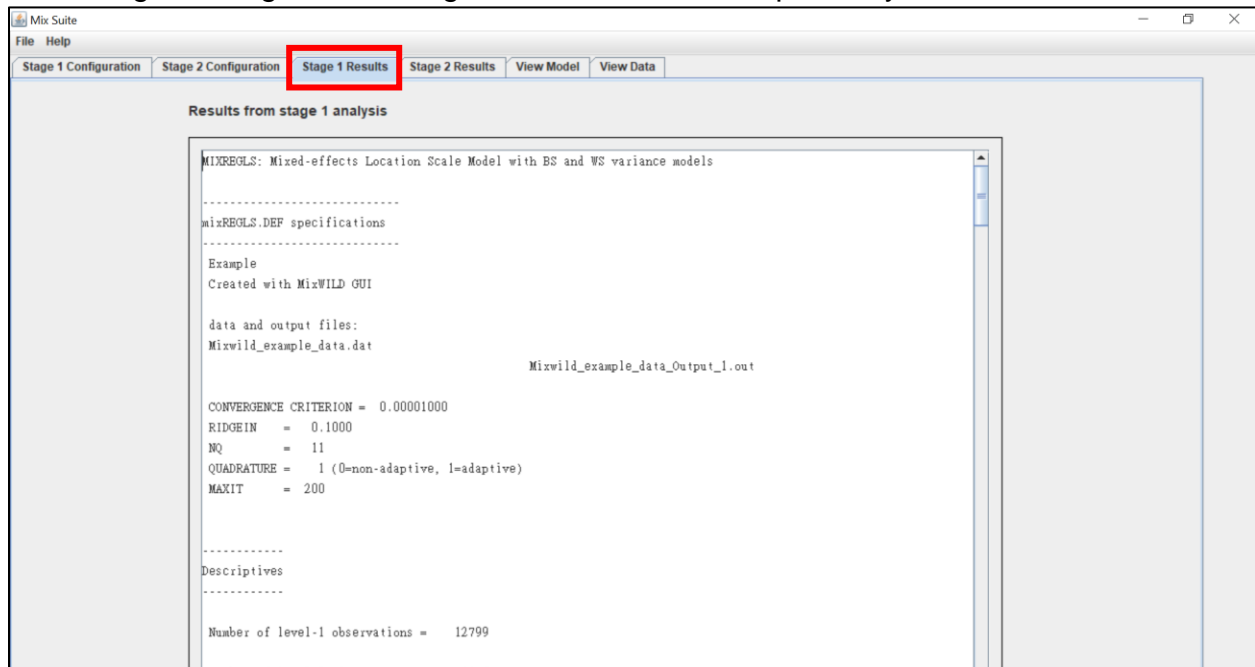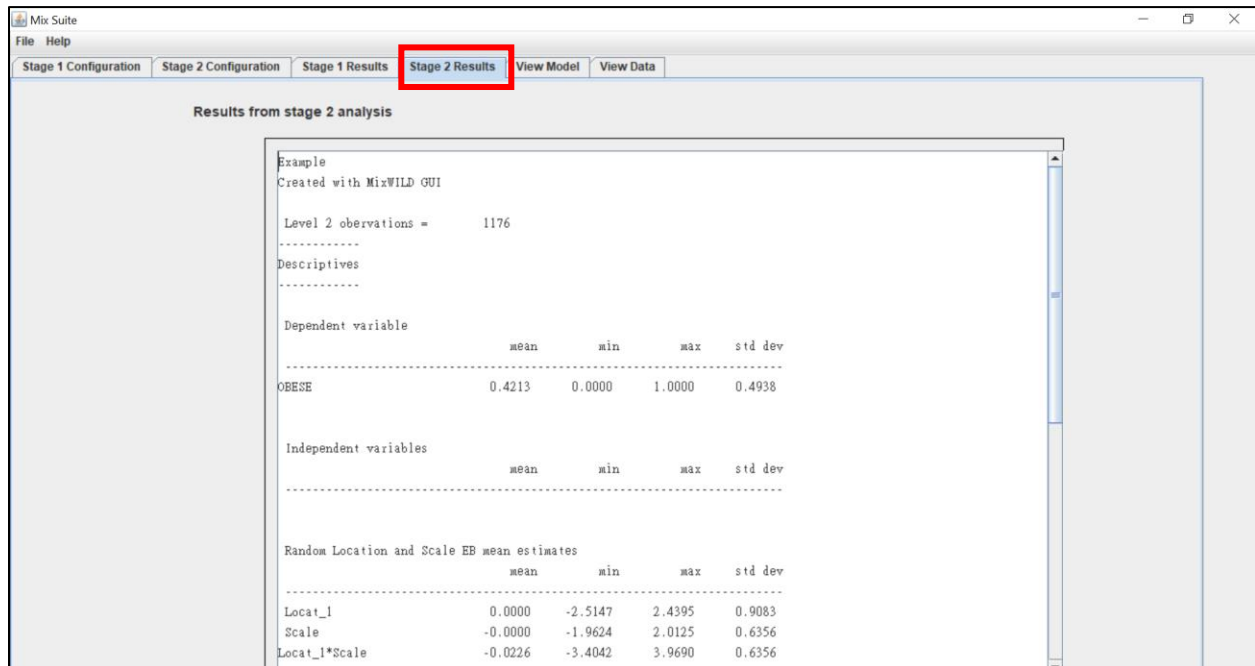

24. All files generated from the program can be found in a folder with the prefix MixWILD under the same directory of your dataset.

| Name                 | Date modified      | Type                                        |
|----------------------|--------------------|---------------------------------------------|
| MIXWILD151988989     | 3/6/2018 5:39 PM   | File folder                                 |
| Mixwild_example_data | 2/26/2018 11:54 AM | Microsoft Excel Comma Separated Values File |

25. The output files with suffix\_1 and \_2 are the results that are identical in the Stage 1 and Stage 2 boxes in the MixWILD program.

| Name                                     | Date modified     | Type                 | Size     |
|------------------------------------------|-------------------|----------------------|----------|
| work                                     | 2/1/2018 10:48 AM | File folder          |          |
| mix_random                               | 2/1/2018 10:48 AM | DEF File             | 1 KB     |
| mix_random                               | 2/1/2018 10:47 AM | Application          | 665 KB   |
| mixor                                    | 2/1/2018 10:47 AM | Application          | 914 KB   |
| mixreg                                   | 2/1/2018 10:47 AM | Application          | 967 KB   |
| MIXREGLS_RANDOM_MIXOR                    | 2/1/2018 10:46 AM | DEF File             | 1 KB     |
| Mixwild_example_data                     | 1/31/2018 5:10 PM | Microsoft Excel C... | 720 KB   |
| Mixwild_example_data                     | 2/1/2018 10:41 AM | DAT File             | 719 KB   |
| Mixwild_example_data_Output              | 2/1/2018 10:47 AM | DEF File             | 1 KB     |
| Mixwild_example_data_Output.mwa          | 2/1/2018 10:46 AM | MWA File             | 101 KB   |
| Mixwild_example_data_Output.mwd          | 2/1/2018 10:46 AM | MWD File             | 20 KB    |
| Mixwild_example_data_Output_1            | 2/1/2018 10:48 AM | OUT File             | 12 KB    |
| Mixwild_example_data_Output_2            | 2/1/2018 10:48 AM | OUT File             | 2 KB     |
| Mixwild_example_data_Output_ebrandom     | 2/1/2018 10:48 AM | DAT File             | 1,142 KB |
| Mixwild_example_data_Output_ebvar        | 2/1/2018 10:48 AM | DAT File             | 88 KB    |
| Mixwild_example_data_Output_level2       | 2/1/2018 10:48 AM | DAT File             | 38 KB    |
| Mixwild_example_data_Output_random       | 2/1/2018 10:48 AM | DEF File             | 1 KB     |
| Mixwild_example_data_Output_random_500   | 2/1/2018 10:48 AM | OUT File             | 1 KB     |
| Mixwild_example_data_Output_repeat_mixor | 2/1/2018 10:48 AM | DEF File             | 1 KB     |
| repeat_mixor                             | 2/1/2018 10:48 AM | DEF File             | 1 KB     |
| repeat_mixor                             | 2/1/2018 10:47 AM | Application          | 680 KB   |
| repeat_mixreg                            | 2/1/2018 10:47 AM | Application          | 677 KB   |

26. There are two submodel results in Output\_1. The first submodel does not include scale parameters; the second submodel includes the random scale estimates.
27. A brief description of the results from the second submodel will be provided in the following section.

## 4.2. Brief interpretation of Mixregls-Logistic regression model results

### Stage 1: model with random scale parameters

```

-----
Model WITH RANDOM Scale
-----
Total Iterations = 15
Final Ridge value = 0.0

Log Likelihood           = -49992.010
Akaike's Information Criterion = -49997.010
Schwarz's Bayesian Criterion = -50009.685

==> multiplied by -2
Log Likelihood           = 99984.021
Akaike's Information Criterion = 99994.021
Schwarz's Bayesian Criterion = 100019.370

Variable                Estimate      AsymStdError      z-value           p-value
-----
BETA (regression coefficients)
Intercept                43.31917      0.26098           165.98699        0.00000
ALPHA (BS variance parameters: log-linear model)
Intercept                4.18557      0.04906           85.31084         0.00000
TAU (WS variance parameters: log-linear model)
Intercept                4.75294      0.01914           248.26182        0.00000
Random scale standard deviation
Std Dev                  0.40459      0.02046           19.77955         0.00000
Random location (mean) effect on WS variance
Loc Eff                  -0.13583     0.02190           -6.20293         0.00000

```

- Since there are no regressors in the Stage 1 model, only the intercept estimates are presented in the mean (Beta), between-subject (Alpha), and the within-subject (Tau) sections in the Stage 1 results.
- The Stage 1 model shows that there is significant variability in scale across subjects, as the Std Dev for the Random scale (on the log scale) is estimated as 0.4046 ( $p < .001$ ). Therefore, individuals differ from each other in their degree of within-subject/intraindividual variability in positive affect.
- The Stage 1 model also shows that the random scale (i.e., within-subject/intraindividual variance) is negatively associated with the random intercept (i.e., within-subject mean), as indicated by the estimate for the Loc Eff for Random location (mean) effect on WS variance (estimate = -0.1358,  $p < .001$ ). Individuals with overall higher mean positive affect are less erratic/more stable in their positive affect responses. (Note that this result may be also due to a ceiling effect in the affect response scale).

## Stage 2: model with a dichotomous subject-level outcome

Mixwild\_example\_data\_Output\_2 - Notepad

File Edit Format View Help

Mixwild example3  
Created with MixWILD GUI

Level 2 observations = 1176

-----  
Final Results  
-----

| Variable      | Estimate | AsymStdError | z-value  | p-value |
|---------------|----------|--------------|----------|---------|
| Intercept     | 0.11711  | 0.08991      | 1.30248  | 0.19275 |
| Locat_1       | 0.41851  | 0.08533      | 4.90443  | 0.00000 |
| Scale         | 0.12689  | 0.10840      | 1.17059  | 0.24176 |
| Locat_1*Scale | -0.09245 | 0.11596      | -0.79726 | 0.42530 |

- In the Stage 2 final results table, *Locat\_1* refers to the effect of the random intercept (i.e., within-subject mean) on obesity risk; *Scale* refers to the effect of random scale (i.e., within-subject variance) on obesity risk; and *Locat\_1\*Scale* is the interaction between random intercept and random scale of positive affect in predicting obesity risk (a subject-level binary variable).
- The Stage 2 model does not include regressors, however, the random intercept (*Locat\_1*), the random scale (*Scale*), and the interaction effect (*Locat\_1\*Scale*) are default regressors in the Stage 2 final results table.
- This logistic regression model shows that the random intercept (*Locat\_1*) is positively associated with obesity risk (estimate OR = -0.4185,  $p < .001$ ). Subjects who have higher means levels of positive affect than others are less likely to be obese.
- The interaction between the random intercept and random slope of positive affect does not predict individual's obesity risk.

### Note:

1. The numbers of level 1 and level 2 observations correspond to the available non-missing observations of level 1 and level 2 variables included in both Stage 1 and Stage 2 models. Thus, since there are no regressors, observations with missing positive affect (level-1) or missing obesity (level-2) are not included in either Stage 1 or Stage 2 analyses.
2. Please refer to the supplemental documents for more detailed explanation of the Stage 1 and Stage 2 model results.

## 5. Example 4: Running Mixregmls- Linear regression model in MixWILD

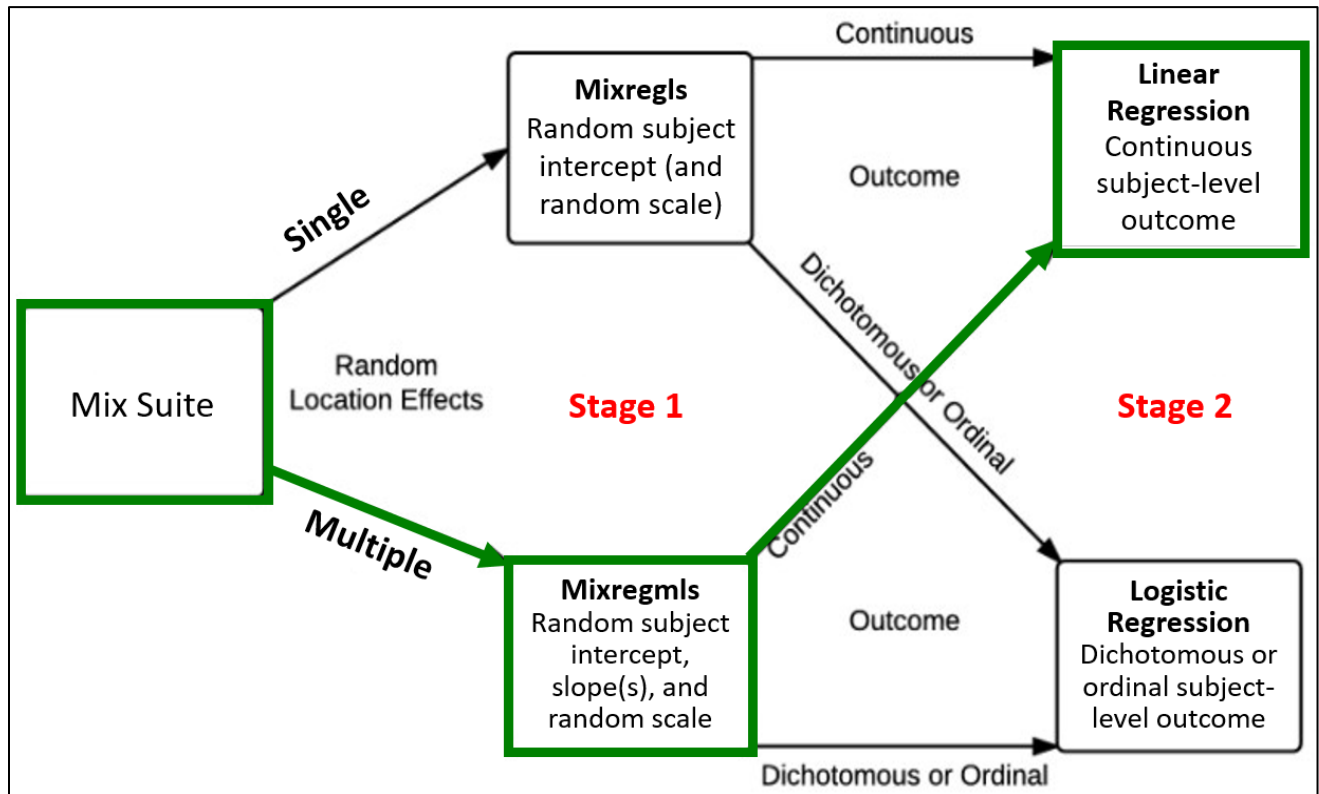

### Example research question for Mixregmls-Linear Regression model

- Examine whether subject-level mean (i.e., random intercept or within-person mean) and subject-level variance (i.e., random scale or degree of within-person / intraindividual variability) of momentary positive affect (within-subject, continuous, time-varying variable) predicts subject-level average minutes per day of moderate to vigorous physical activity (MVPA; between-subject, continuous, time-invariant variable), in addition to their positive affect change between weekdays and weekends (within-subject, dichotomous, time-varying variable), and BMI (between-subject, continuous, time-invariant variable).
- Examine whether there is significant variability between individuals in the **association** (i.e., random slope) between weekday/weekend and momentary positive affect (i.e., whether individuals differ from each other in the extent to which positive affect increases towards the end of the week), after controlling for subject-level mean and subject-level variance.
- Examining whether the variability between individuals in the **association** (i.e., random slope) between weekday/weekend and momentary positive affect predicts average minutes per day of MVPA, after controlling for BMI.

**Stage 1 outcome variable:** Positive affect (time-varying)

**Stage 1 regressor (with random slope):** Weekday/Weekend (time-varying)

**Stage 2 outcome variable:** Average minutes per day of MVPA (time-invariant)

**Stage 2 regressor:** BMI (time-invariant)

## 5.1. Step-by-step instructions on running Mixregmls - Linear regression model in MixWILD

1. Double-click on the the MixWILD icon to open the main window.
2. Click on **“File”** and then select **“New Model”** (or use keyboard shortcut Ctrl + N).



3. Click on **“Instructions”** to make sure your data are in the correct format.

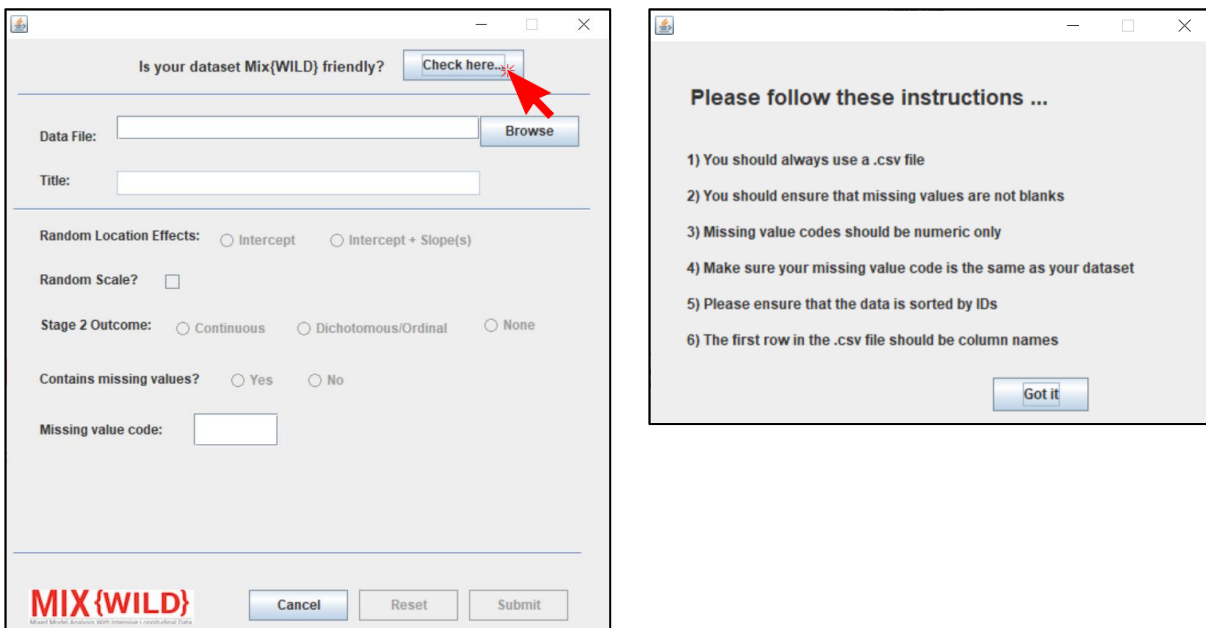

- Click on **“Browse”** to select the location of your data file (in .csv) and then click **“Open”**.

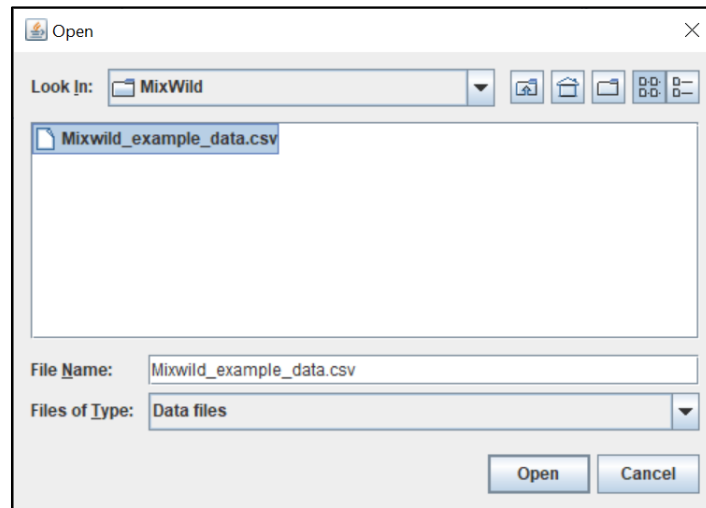

- Click on **“View Data”** to preview your data file to verify your data and format are correct.

Imported data file: Mixwild\_example\_data.csv

| ID | AGE   | SEX | WEEKEND | DOW | OBESE | BMI   | NEG_AFFE | POS_AFFE | MVPA_daily | SED_daily |
|----|-------|-----|---------|-----|-------|-------|----------|----------|------------|-----------|
| 1  | 10.47 | 1   | 0       | 0   | 1     | -4.79 | 40       | 27       | 38.19      | -999      |
| 1  | 10.47 | 1   | 0       | 1   | 1     | -4.79 | -999     | 30       | 38.19      | -999      |
| 1  | 10.47 | 1   | 0       | 1   | 1     | -4.79 | 50       | 35       | 38.19      | -999      |
| 1  | 10.47 | 1   | 1       | 5   | 1     | -4.79 | 10       | 38       | 38.19      | -999      |
| 1  | 10.47 | 1   | 0       | 1   | 1     | -4.79 | 35       | 43       | 38.19      | -999      |
| 1  | 10.47 | 1   | 1       | 5   | 1     | -4.79 | 40       | 44       | 38.19      | -999      |
| 1  | 10.47 | 1   | 0       | 1   | 1     | -4.79 | 10       | -999     | 38.19      | -999      |
| 1  | 10.47 | 1   | 0       | 0   | 1     | -4.79 | 20       | -999     | 38.19      | -999      |
| 1  | 10.47 | 1   | 0       | 0   | 1     | -4.79 | 30       | -999     | 38.19      | -999      |
| 1  | 10.47 | 1   | 0       | 0   | 1     | -4.79 | 40       | -999     | 38.19      | -999      |
| 1  | 10.47 | 1   | 1       | 5   | 1     | -4.79 | 40       | -999     | 38.19      | -999      |
| 2  | 20.47 | 1   | 0       | 3   | 1     | -4.79 | 52       | 15       | 22.03      | 9.46      |
| 2  | 20.47 | 1   | 0       | 2   | 1     | -4.79 | 39       | 17       | 22.03      | 9.46      |
| 2  | 20.47 | 1   | 0       | 3   | 1     | -4.79 | 49       | 22       | 22.03      | 9.46      |
| 2  | 20.47 | 1   | 1       | 6   | 1     | -4.79 | 50       | 22       | 22.03      | 9.46      |
| 2  | 20.47 | 1   | 1       | 6   | 1     | -4.79 | 59       | 24       | 22.03      | 9.46      |
| 2  | 20.47 | 1   | 1       | 5   | 1     | -4.79 | 30       | 33       | 22.03      | 9.46      |
| 2  | 20.47 | 1   | 1       | 6   | 1     | -4.79 | 20       | 35       | 22.03      | 9.46      |
| 2  | 20.47 | 1   | 0       | 4   | 1     | -4.79 | 10       | 38       | 22.03      | 9.46      |
| 2  | 20.47 | 1   | 1       | 6   | 1     | -4.79 | 40       | 39       | 22.03      | 9.46      |
| 2  | 20.47 | 1   | 1       | 6   | 1     | -4.79 | 41       | 44       | 22.03      | 9.46      |
| 2  | 20.47 | 1   | 1       | 5   | 1     | -4.79 | 50       | 46       | 22.03      | 9.46      |
| 2  | 20.47 | 1   | 0       | 4   | 1     | -4.79 | 50       | 48       | 22.03      | 9.46      |
| 2  | 20.47 | 1   | 1       | 5   | 1     | -4.79 | 40       | 49       | 22.03      | 9.46      |
| 2  | 20.47 | 1   | 1       | 5   | 1     | -4.79 | 40       | 49       | 22.03      | 9.46      |
| 2  | 20.47 | 1   | 0       | 4   | 1     | -4.79 | 50       | 51       | 22.03      | 9.46      |
| 2  | 20.47 | 1   | 0       | 2   | 1     | -4.79 | 10       | 52       | 22.03      | 9.46      |
| 2  | 20.47 | 1   | 0       | 0   | 1     | -4.79 | 50       | 59       | 22.03      | 9.46      |
| 2  | 20.47 | 1   | 0       | 0   | 1     | -4.79 | 30       | 62       | 22.03      | 9.46      |
| 2  | 20.47 | 1   | 1       | 5   | 1     | -4.79 | 40       | 65       | 22.03      | 9.46      |
| 2  | 20.47 | 1   | 1       | 5   | 1     | -4.79 | 20       | 66       | 22.03      | 9.46      |
| 3  | 17.47 | 1   | 0       | 2   | 1     | -4.79 | 61       | 15       | 22.03      | 9.46      |
| 3  | 17.47 | 1   | 0       | 4   | 1     | -4.79 | 38       | 22       | 22.03      | 9.46      |
| 3  | 17.47 | 1   | 1       | 6   | 1     | -4.79 | 60       | 25       | 22.03      | 9.46      |
| 3  | 17.47 | 1   | 0       | 2   | 1     | -4.79 | 33       | 38       | 22.03      | 9.46      |

6. Add title to your output files.
7. Select **“Intercept + Slope”** from Random Location Effects specification for subject-level mean and subject-level slope. Check **“Random Scale”** for subject-level variability.
8. Select **“Continuous”** for Stage 2 outcome.
9. Click on missing values if there are any in your dataset; specify your missing value code in the box (i.e., -999 in the example dataset).

10. After you submit, the interface will take you to the page that enables you to configure your Stage 1 model.



11. On the Stage 1 configuration page, select your ID variable and positive affect as your Stage 1 outcome variable.
12. Specify the association between mean and within- subject (WS) variance, which is the association between the random location and random scale effects. The default is no association, but **“Yes”** is selected for the following example.

Mix Suite

File Help

Stage 1 Configuration Stage 2 Configuration Stage 1 Results Stage 2 Results View Model View Data

Selected model configuration:  
Random location effects: Intercept + Slope  
Stage 2 outcome: Continuous

Stage 1 Regressors

|         | Mean | Random Slo... | Scale |  | Mean | Scale |
|---------|------|---------------|-------|--|------|-------|
| Level-1 |      |               |       |  |      |       |
| Level-2 |      |               |       |  |      |       |

ID Variable:  
ID

Stage 1 Outcome:  
POS\_AFFECT

Configure Stage 1 Regressors ...

Options ...

Association of random location & scale?

Yes

No

MIX {WILD}

Reset Configure Stage 2

13. Click on **“Modify Stage 1 regressors”** and select time-varying regressor **“WEEKEND”** as the regressor in the Stage 1 model.

Add Stage 1 Regressors

Variables

Age  
SEX  
DOW  
OBESE  
BMI  
NEG\_AFFECT  
MVPA\_daily\_mins  
SED\_daily\_hrs

Add

Remove

Level-1 (Time Varying)

WEEKEND

Level-2 (Time Invariant)

Add

Remove

MIX {WILD}

Cancel Reset Submit

14. Select the boxes in the mean column, BS Variance column, and WS Variance column to allow Stage 1 regressors to predict mean, between-subject variance, and/or within-subject variance of Stage 1 outcome, respectively.
15. In this example, weekend is selected to predict the mean and is allowed to have a random slope on positive affect (i.e., the weekend effect on positive affect will vary across subjects).
16. Select **“Disaggregate”** for each of the time-varying variable(s) for which decomposition of the within-subject and between-subject effects in predicting Stage 1 outcome is desired. Weekend is not disaggregated in this example.

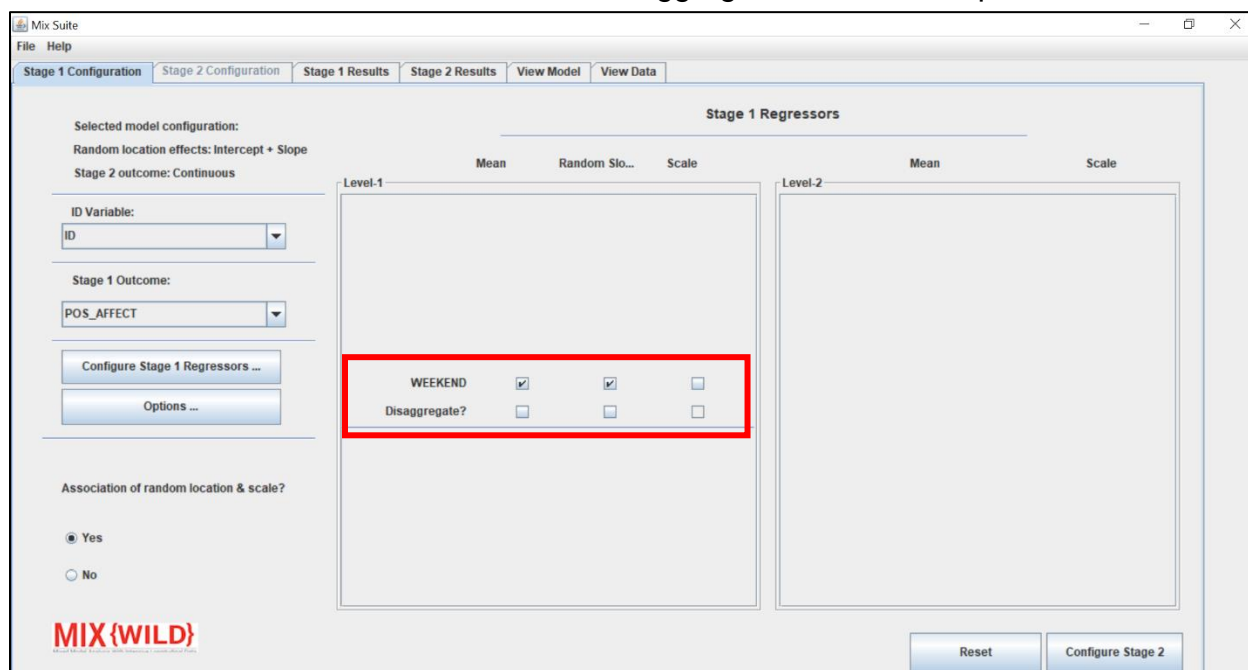

17. Click on **“Options”** to change other default settings if needed.

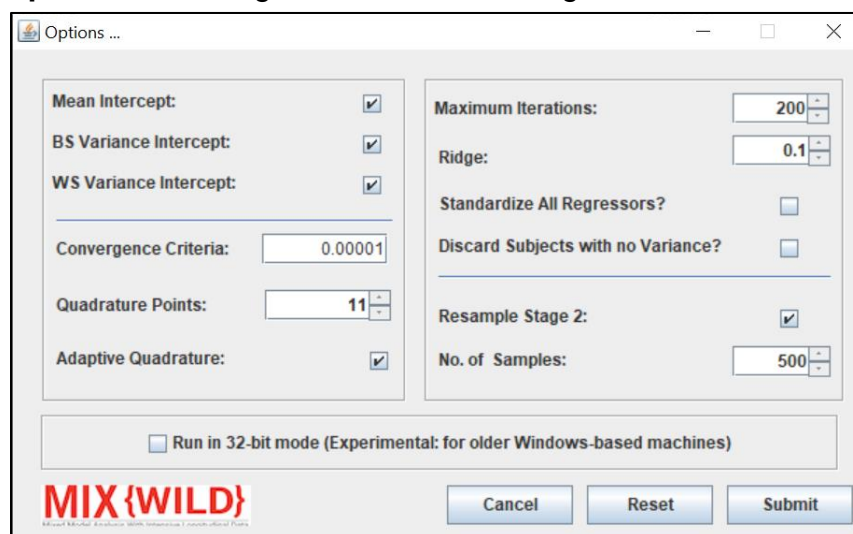

18. In most cases, we will keep Mean, BS and WS intercept checked.
19. By default, the estimated random effects of the Stage 1 analysis (i.e., random location and scale effects) are resampled 500 times in the Stage 2 analysis. Resampling is necessary because the random effects are estimated quantities that are entered as regressors in the Stage 2 model.
20. Leave “**Discard Subjects**” unchecked, to retain all participants in the Stage 1 analysis. Click on “**Submit**”. (refer to the supplemental documents for further description of Options settings)

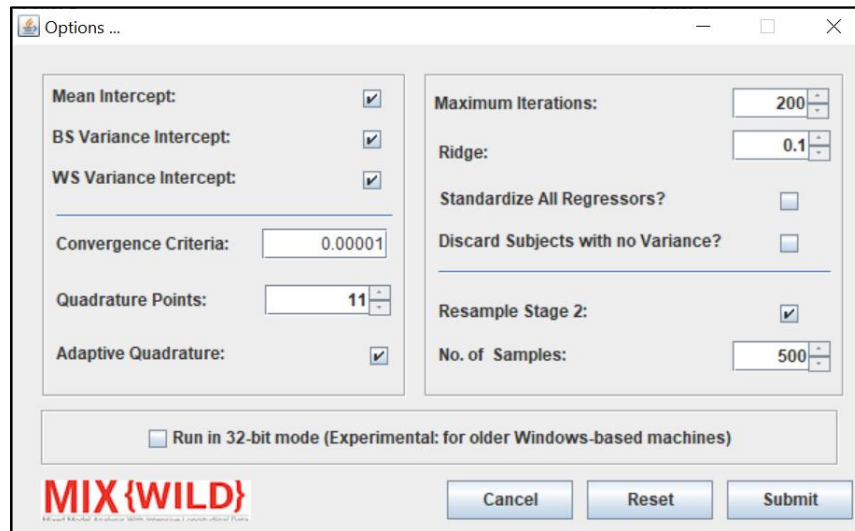

21. Select “**MVPA\_daily\_minutes**” as Stage 2 outcome variable.

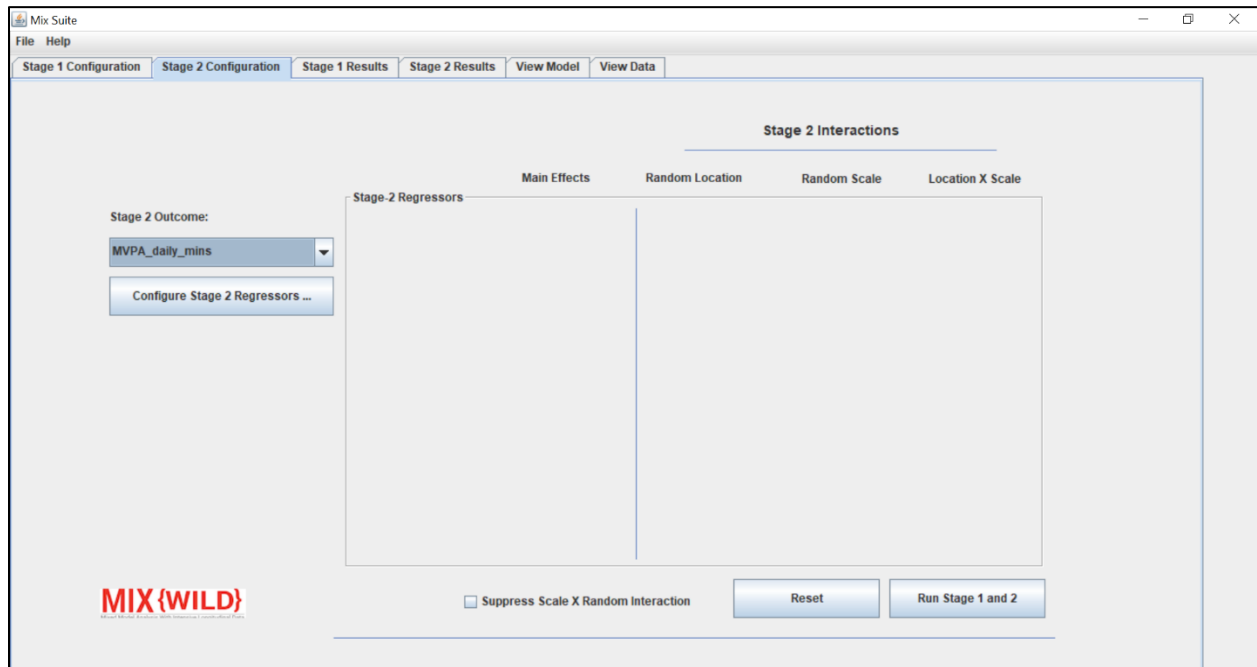

22. Add Stage 2 regressor “**BMI**” into the model. Stage 2 regressor(s) are generally time-invariant variable(s). However, if they are time-varying variables, the program will calculate subject averages of the variable. Click on “**Submit**” when finished.

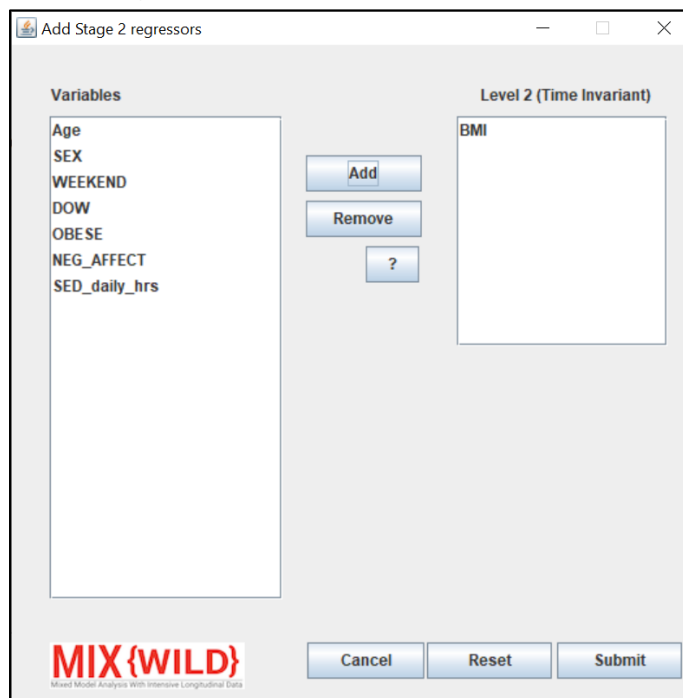

23. Select to add main effect of BMI in predicting daily MVPA minutes. In this example, the interactions between BMI and random location or random slope were not tested, so the remaining boxes are unchecked.

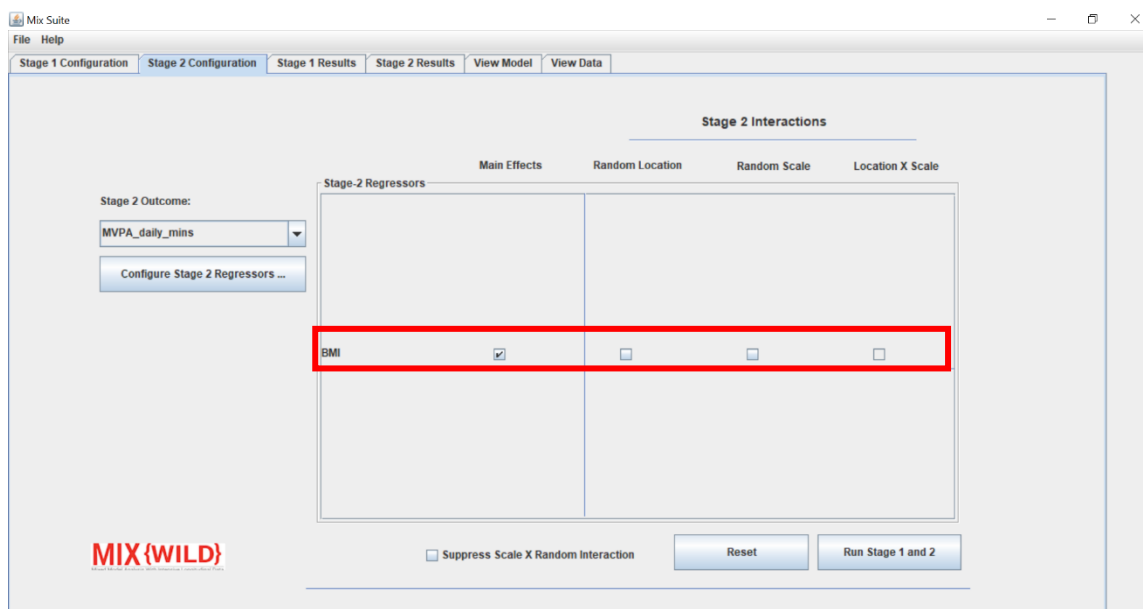

24. Click on Stage 1 and Stage 2 configurations to double-check your model. Click on **“Run Stage 1 and 2”** to generate the definition file. The definition file contains the syntax that instructs the program to estimate the specified model.
25. In the definition file, click on **“Proceed”** to run your model and generate model output files. If you see a field with the text **“null”**, it means that there is a mistake in your model that should be fixed.



```

Definition File Preview

Example4
Created with MixWILD GUI
"Mixwild_example_data.dat"
Mixwild_example_data_Output
11 1 1 0 0 0 0 0 0 0 0.00001 11 1 200 -999 0 0 0.15
500 0.00000 0 0 0
1 9
4
4

POS_AFFECT
WEEKEND
WEEKEND

1 0 0 0
10
7

MVPA_daily_mins
BMI

Proceed Save Def File

```

26. A window will appear while model estimation is in progress. The time for generating the final output depends on the data size and complication of your specified model, the run time to estimate a model including random slope could range up to 20 minutes or longer.

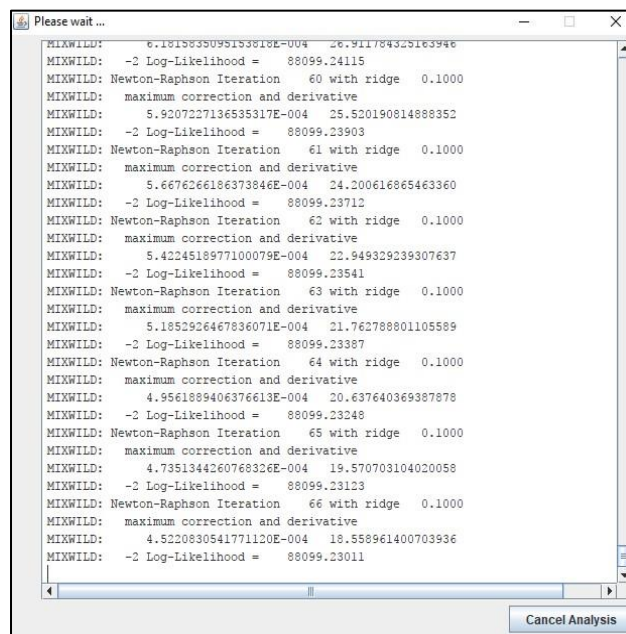

```

Please wait ...

MIXWILD: 6.1818835095183818E-004 26.911784323163946
MIXWILD: -2 Log-Likelihood = 88099.24115
MIXWILD: Newton-Raphson Iteration 60 with ridge 0.1000
MIXWILD: maximum correction and derivative
MIXWILD: 5.9207227136535317E-004 25.520190814888352
MIXWILD: -2 Log-Likelihood = 88099.23903
MIXWILD: Newton-Raphson Iteration 61 with ridge 0.1000
MIXWILD: maximum correction and derivative
MIXWILD: 5.6676266186373846E-004 24.200616865463360
MIXWILD: -2 Log-Likelihood = 88099.23712
MIXWILD: Newton-Raphson Iteration 62 with ridge 0.1000
MIXWILD: maximum correction and derivative
MIXWILD: 5.4224518977100079E-004 22.949329239307637
MIXWILD: -2 Log-Likelihood = 88099.23541
MIXWILD: Newton-Raphson Iteration 63 with ridge 0.1000
MIXWILD: maximum correction and derivative
MIXWILD: 5.1852926467836071E-004 21.762789801105589
MIXWILD: -2 Log-Likelihood = 88099.23387
MIXWILD: Newton-Raphson Iteration 64 with ridge 0.1000
MIXWILD: maximum correction and derivative
MIXWILD: 4.9561889406376613E-004 20.637640369387878
MIXWILD: -2 Log-Likelihood = 88099.23248
MIXWILD: Newton-Raphson Iteration 65 with ridge 0.1000
MIXWILD: maximum correction and derivative
MIXWILD: 4.7351344260768326E-004 19.570703104020058
MIXWILD: -2 Log-Likelihood = 88099.23123
MIXWILD: Newton-Raphson Iteration 66 with ridge 0.1000
MIXWILD: maximum correction and derivative
MIXWILD: 4.5220830541771120E-004 18.558961400703936
MIXWILD: -2 Log-Likelihood = 88099.23011

Cancel Analysis

```

27. If the following warning message appears, it indicates that computational difficulties were encountered that prevented the model parameters from being estimated successfully. In this case, double-check the format of your dataset and your model specifications. Some suggestions for steps to take are listed in Appendix A.

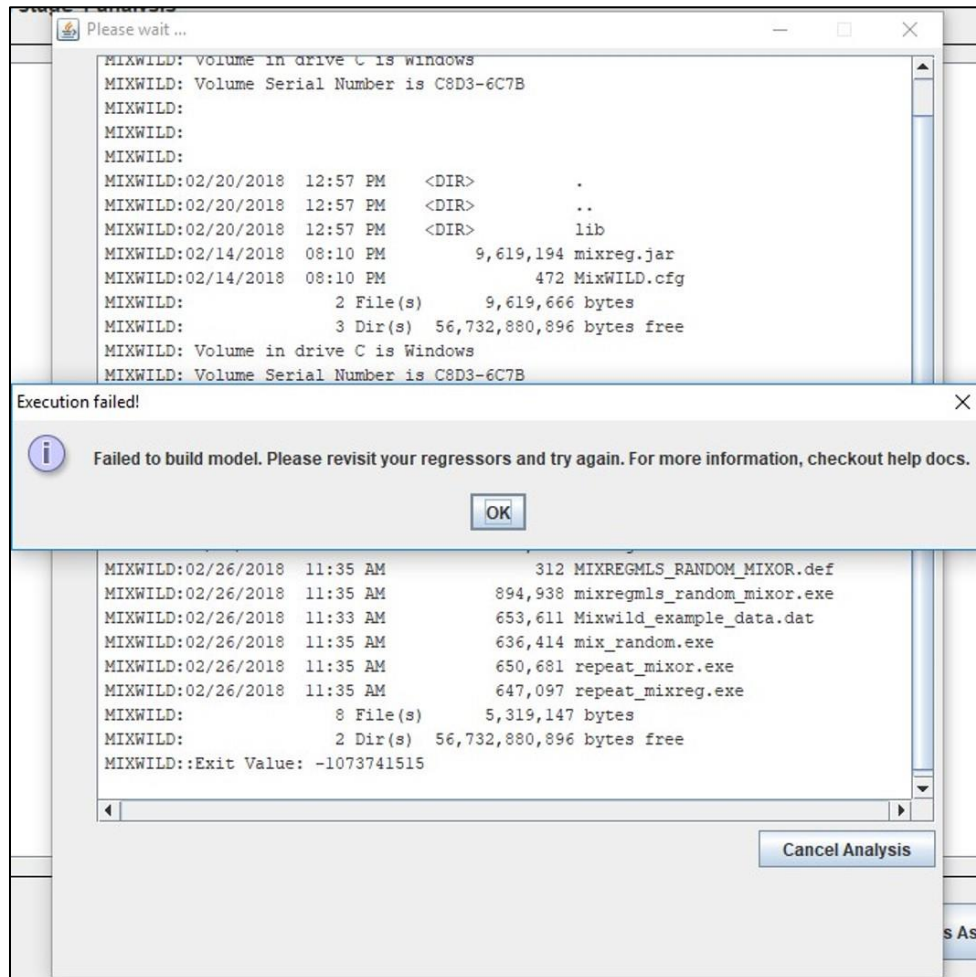

28. When estimation is completed, the Stage 1 and Stage 2 results can be seen by clicking the Stage 1 and Stage 2 Results boxes, respectively.

| Stage 1 Configuration                                     | Stage 2 Configuration | Stage 1 Results | Stage 2 Results | View Model | View Data |
|-----------------------------------------------------------|-----------------------|-----------------|-----------------|------------|-----------|
| <b>Results from stage 1 analysis</b>                      |                       |                 |                 |            |           |
| -----                                                     |                       |                 |                 |            |           |
| Model WITH RANDOM Scale and Location-Scale Association    |                       |                 |                 |            |           |
| -----                                                     |                       |                 |                 |            |           |
| Total Iterations = 15                                     |                       |                 |                 |            |           |
| Final Ridge value = 0.00                                  |                       |                 |                 |            |           |
| Log Likelihood = -49663.899                               |                       |                 |                 |            |           |
| Akaike's Information Criterion = -49672.899               |                       |                 |                 |            |           |
| Schwarz's Bayesian Criterion = -49695.671                 |                       |                 |                 |            |           |
| ==> multiplied by -2                                      |                       |                 |                 |            |           |
| Log Likelihood = 99327.797                                |                       |                 |                 |            |           |
| Akaike's Information Criterion = 99345.797                |                       |                 |                 |            |           |
| Schwarz's Bayesian Criterion = 99391.342                  |                       |                 |                 |            |           |
| -----                                                     |                       |                 |                 |            |           |
| Variable                                                  | Estimate              | AsymStdError    | z-value         | p-value    |           |
| -----                                                     |                       |                 |                 |            |           |
| BETA (regression coefficients)                            |                       |                 |                 |            |           |
| Intercept                                                 | 42.54922              | 0.29252         | 145.45823       | 0.00000    |           |
| WEEKEND                                                   | 1.64891               | 0.23799         | 6.92840         | 0.00000    |           |
| Random (location) Effect Variances and Covariances        |                       |                 |                 |            |           |
| Intercept                                                 | 71.87876              | 3.91368         | 18.36605        | 0.00000    |           |
| Covariance12                                              | -10.40457             | 2.37375         | -4.38318        | 0.00001    |           |
| WEEKEND                                                   | 14.78058              | 2.60495         | 5.67404         | 0.00000    |           |
| TAU (WS variance parameters: log-linear model)            |                       |                 |                 |            |           |
| Intercept                                                 | 4.71390               | 0.01958         | 240.81170       | 0.00000    |           |
| Random location effects on WS variance (log-linear model) |                       |                 |                 |            |           |

| Stage 1 Configuration                          | Stage 2 Configuration | Stage 1 Results | Stage 2 Results | View Model | View Data |
|------------------------------------------------|-----------------------|-----------------|-----------------|------------|-----------|
| <b>Results from stage 2 analysis</b>           |                       |                 |                 |            |           |
| -----                                          |                       |                 |                 |            |           |
| Locat_2                                        | -0.0000               | -1.5834         | 1.8591          | 0.5152     |           |
| Scale                                          | -0.0000               | -1.9131         | 1.7382          | 0.6266     |           |
| Locat_1*Scale                                  | -0.0175               | -2.9460         | 3.5733          | 0.6266     |           |
| Number of replications = 500                   |                       |                 |                 |            |           |
| -----                                          |                       |                 |                 |            |           |
| Final Results                                  |                       |                 |                 |            |           |
| -----                                          |                       |                 |                 |            |           |
| Average Log Likelihood = -4458.884 (sd= 2.993) |                       |                 |                 |            |           |
| Akaike's Information Criterion = -4464.884     |                       |                 |                 |            |           |
| Schwarz's Bayesian Criterion = -4480.065       |                       |                 |                 |            |           |
| ==> multiplied by -2                           |                       |                 |                 |            |           |
| Log Likelihood = 8917.768                      |                       |                 |                 |            |           |
| Akaike's Information Criterion = 8929.768      |                       |                 |                 |            |           |
| Schwarz's Bayesian Criterion = 8960.130        |                       |                 |                 |            |           |
| -----                                          |                       |                 |                 |            |           |
| Variable                                       | Estimate              | AsymStdError    | z-value         | p-value    |           |
| -----                                          |                       |                 |                 |            |           |
| Intercept                                      | 60.58810              | 1.40794         | 43.03307        | 0.00000    |           |
| BMI                                            | -0.76587              | 0.05049         | -15.16847       | 0.00000    |           |
| Locat_1                                        | 1.46400               | 0.45424         | 3.22297         | 0.00127    |           |
| Locat_2                                        | -0.27521              | 0.64670         | -0.42556        | 0.67043    |           |
| Scale                                          | 1.34265               | 0.57103         | 2.35128         | 0.01871    |           |
| Locat_1*Scale                                  | -0.66794              | 0.59394         | -1.12459        | 0.26076    |           |
| Resid.Variance                                 | 123.57794             | 5.15942         | 23.95190        | 0.00000    |           |



29. All files generated from the program can be found in a folder with the prefix MixWILD under the same directory of your dataset.

| Name                 | Date modified      | Type                                        |
|----------------------|--------------------|---------------------------------------------|
| MIXWILD151988992     | 3/6/2018 5:39 PM   | File folder                                 |
| Mixwild_example_data | 2/26/2018 11:54 AM | Microsoft Excel Comma Separated Values File |

30. The OUT files with suffix \_1 and \_2 are the results that are identical to those in the Stage 1 and Stage 2 boxes.

| Name                                      | Date modified      | Type                 | Size     |
|-------------------------------------------|--------------------|----------------------|----------|
| work                                      | 4/1/2018 5:06 PM   | File folder          |          |
| mix_random                                | 2/26/2018 1:12 PM  | DEF File             | 1 KB     |
| mix_random                                | 2/26/2018 12:49 PM | Application          | 665 KB   |
| mixor                                     | 2/26/2018 12:49 PM | Application          | 914 KB   |
| mixreg                                    | 2/26/2018 12:49 PM | Application          | 967 KB   |
| MIXREGMLS_RANDOM_MIXREG                   | 2/26/2018 12:48 PM | DEF File             | 1 KB     |
| Mixwild_example_data                      | 3/8/2018 11:42 AM  | Microsoft Excel C... | 635 KB   |
| Mixwild_example_data                      | 2/26/2018 12:47 PM | DAT File             | 635 KB   |
| Mixwild_example_data_Output               | 2/26/2018 12:49 PM | DEF File             | 1 KB     |
| Mixwild_example_data_Output.mwa           | 2/26/2018 12:48 PM | MWA File             | 94 KB    |
| Mixwild_example_data_Output.mwd           | 2/26/2018 12:48 PM | MWD File             | 20 KB    |
| Mixwild_example_data_Output_1             | 2/26/2018 1:12 PM  | OUT File             | 14 KB    |
| Mixwild_example_data_Output_2             | 2/26/2018 1:13 PM  | OUT File             | 3 KB     |
| Mixwild_example_data_Output_ebrandom      | 2/26/2018 1:12 PM  | DAT File             | 1,707 KB |
| Mixwild_example_data_Output_ebvar         | 2/26/2018 1:12 PM  | DAT File             | 156 KB   |
| Mixwild_example_data_Output_level2        | 2/26/2018 1:12 PM  | DAT File             | 55 KB    |
| Mixwild_example_data_Output_random        | 2/26/2018 1:12 PM  | DEF File             | 1 KB     |
| Mixwild_example_data_Output_random_500    | 2/26/2018 1:13 PM  | OUT File             | 2 KB     |
| Mixwild_example_data_Output_repeat_mixreg | 2/26/2018 1:12 PM  | DEF File             | 1 KB     |
| repeat_mixor                              | 2/26/2018 12:49 PM | Application          | 680 KB   |
| repeat_mixreg                             | 2/26/2018 1:12 PM  | DEF File             | 1 KB     |
| repeat_mixreg                             | 2/26/2018 12:49 PM | Application          | 677 KB   |

31. There are 3 submodel results in Output\_1. The first submodel does not include scale parameters; the second submodel includes the random scale estimates, and the third submodel includes the random scale estimates and the random location-scale association as follows. (A brief description of results from the following third submodel will be provided)

#### Model WITH RANDOM Scale and Location-Scale Association

Total Iterations = 15  
Final Ridge value = 0.00

Log Likelihood = -49663.899  
Akaike's Information Criterion = -49672.899  
Schwarz's Bayesian Criterion = -49695.671



## 5.1. Brief interpretation of Mixregmls - Linear Regression model results

### Stage 1 model with random scale and location-scale association

| Model WITH RANDOM Scale and Location-Scale Association    |           |              |           |         |
|-----------------------------------------------------------|-----------|--------------|-----------|---------|
| Total Iterations = 15                                     |           |              |           |         |
| Final Ridge value = 0.00                                  |           |              |           |         |
| Variable                                                  | Estimate  | AsymStdError | z-value   | p-value |
| BETA (regression coefficients)                            |           |              |           |         |
| Intercept                                                 | 42.54922  | 0.29252      | 145.45823 | 0.00000 |
| WEEKEND                                                   | 1.64891   | 0.23799      | 6.92840   | 0.00000 |
| Random (location) Effect Variances and Covariances        |           |              |           |         |
| Intercept                                                 | 71.87876  | 3.91368      | 18.36605  | 0.00000 |
| Covariance12                                              | -10.40457 | 2.37375      | -4.38318  | 0.00001 |
| WEEKEND                                                   | 14.78058  | 2.60495      | 5.67404   | 0.00000 |
| TAU (WS variance parameters: log-linear model)            |           |              |           |         |
| Intercept                                                 | 4.71390   | 0.01958      | 240.81170 | 0.00000 |
| Random location effects on WS variance (log-linear model) |           |              |           |         |
| Intercept                                                 | -0.12200  | 0.02285      | -5.33863  | 0.00000 |
| WEEKEND                                                   | -0.03975  | 0.03458      | -1.14954  | 0.25033 |
| Random scale standard deviation                           |           |              |           |         |
| Std Dev                                                   | 0.40098   | 0.02108      | 19.01857  | 0.00000 |

- The Stage 1 model shows that weekend is positively associated with positive affect (estimate=1.6489,  $p<.001$ ). Individuals overall have higher mean positive affect on weekend days relative to weekdays.
- There is significant variability in both intercept (i.e., random intercept) and slope (i.e., random slope) across subjects. The random intercept is estimated as 71.8788 on the log scale ( $p<.001$ ) and the random slope is estimated as 14.7808 on the log scale ( $p<.001$ ). Therefore, individuals differ from each other in their mean levels of positive affect and in their associations between weekday/weekend and momentary positive affect.
- The random intercept and random slope are negatively associated with each other (estimate= -10.4045,  $p<.001$ ). This negative covariance indicates that subjects with higher weekday mean levels of positive affect (i.e., higher levels of the intercept) do not increase in positive affect as much on weekends, relative to subjects with lower weekday positive affect.
- For the relationships between the random location and scale effects, the random intercept (i.e., weekday positive affect) is negatively associated with the WS variance (estimated as -0.1220 on the log scale ( $p<.001$ )). This indicates that **subjects with higher weekday positive affect are more consistent/less erratic in their mood reports**. A subject's random slope (positive affect change on weekend days relative to weekdays) is not significantly related to a subject's WS variance.
- There is significant variability in scale across subjects, as the Std Dev for the Random scale is estimated as 0.4010 on the log scale ( $p<.001$ ). Thus, individuals differ from each other in their degree of within-subject/intraindividual variability in positive affect.

## Stage 2 model with continuous subject-level outcome

| Final Results                  |           |                       |           |         |
|--------------------------------|-----------|-----------------------|-----------|---------|
| Variable                       | Estimate  | AsymStdError          | z-value   | p-value |
| Average Log Likelihood         | =         | -4458.884 (sd= 2.993) |           |         |
| Akaike's Information Criterion | =         | -4464.884             |           |         |
| Schwarz's Bayesian Criterion   | =         | -4480.065             |           |         |
| ==> multiplied by -2           |           |                       |           |         |
| Log Likelihood                 | =         | 8917.768              |           |         |
| Akaike's Information Criterion | =         | 8929.768              |           |         |
| Schwarz's Bayesian Criterion   | =         | 8960.130              |           |         |
| Intercept                      | 60.58810  | 1.40794               | 43.03307  | 0.00000 |
| BMI                            | -0.76587  | 0.05049               | -15.16847 | 0.00000 |
| Locat_1                        | 1.46400   | 0.45424               | 3.22297   | 0.00127 |
| Locat_2                        | -0.27521  | 0.64670               | -0.42556  | 0.67043 |
| Scale                          | 1.34265   | 0.57103               | 2.35128   | 0.01871 |
| Locat_1*Scale                  | -0.66794  | 0.59394               | -1.12459  | 0.26076 |
| Resid.Variance                 | 123.57794 | 5.15942               | 23.95190  | 0.00000 |

- In the Stage 2 final results table, *Locat\_1* refers to the effect of the random intercept (i.e., within-subject mean) on MVPA minutes; *Locat\_2* refers to the effect of the random slope (i.e., within-subject association between weekday/weekend and positive affect) on MVPA minutes; *Scale* refers to the effect of random scale (i.e., within-subject variance) on MVPA minutes; and *Locat\_1\*Scale* is the interaction between random intercept and random scale predicting MVPA minutes.
- Results show that after controlling for other variables, subjects' BMI is negatively associated with mean MVPA minutes (estimate= -0.7659,  $p < .001$ ).
- The random intercept (*Locat\_1*) positively predicts MVPA minutes when the random scale is zero (estimate= 1.4640,  $p < .001$ ). Since the random effects are centered around zero, a random scale of zero represents the average scale. For subjects with average scale of positive affect, higher levels of weekday positive affect are associated with higher daily MVPA minutes.
- The random scale (*Scale*) is significant in predicting MVPA minutes when the random intercept (*Locat\_1*) is zero (estimate=1.3427,  $p < .05$ ). Since the random effects are centered around zero, a random intercept of zero represents the average positive affect level on weekdays. For subjects with average weekday levels of positive affect, higher levels of mood variability are associated with higher averaged daily MVPA minutes.

### Note:

1. The numbers of level 1 and level 2 observations correspond to the available non-missing observations of level 1 and level 2 variables included in both Stage 1 and Stage 2 models. Thus, these analyses are carried out using observations that are non-missing in terms of both outcomes (positive affect and averaged daily MVPA) and regressors (weekday and BMI). Refer to the supplemental documents for more detailed explanation of the Stage 1 and Stage 2 model results.

## 6. Example 5: Running Mixregmls - Logistic regression model in MixWILD

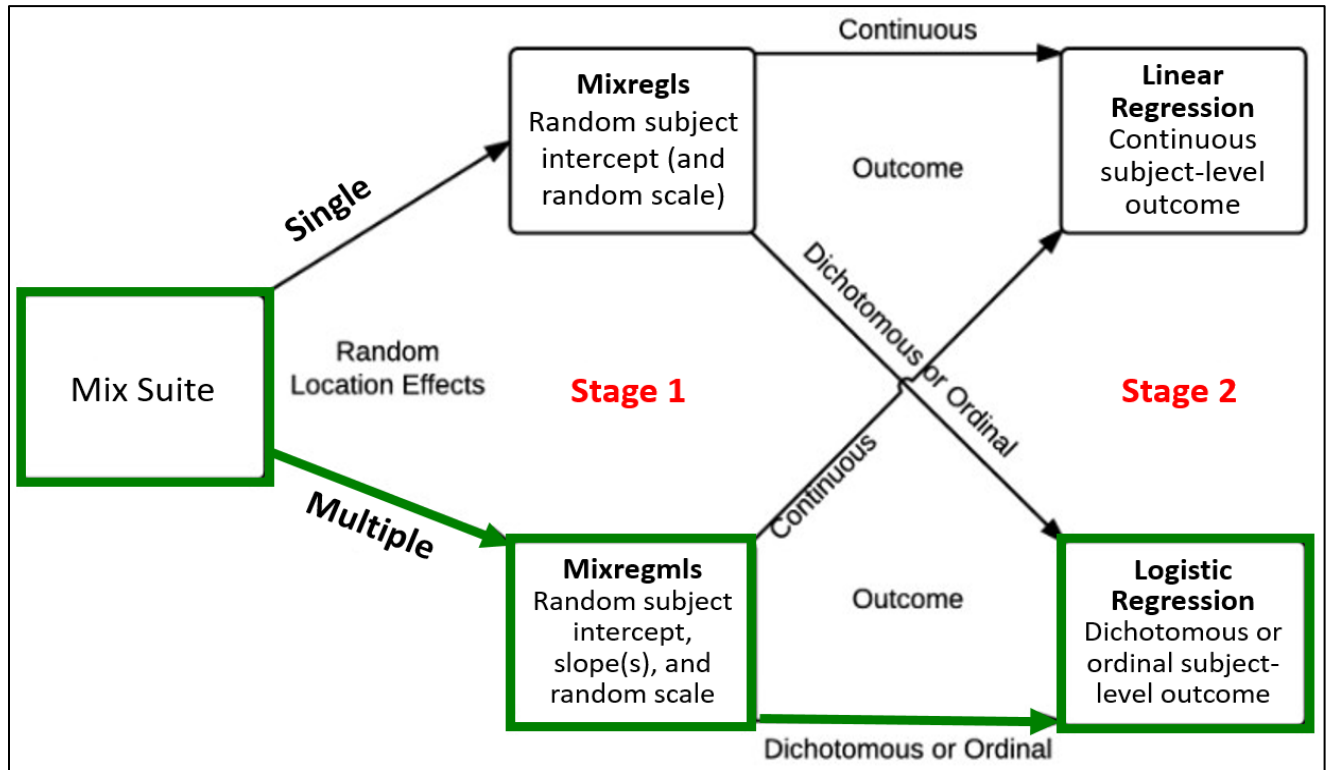

### Example research questions for Mixregmls-Logistic Regression model

- Examine whether subject-level mean (i.e., random intercept or within-person mean) and subject-level variance (i.e., random scale or degree of within-person / intraindividual variability) of momentary positive affect (within-subject, continuous, time-varying variable) predicts subject-level obesity risk (between-subject, dichotomous, time-invariant variable), in addition to their positive affect change between weekdays and weekends (within-subject, dichotomous, time-varying variable), Sex, and Age (between-subject, continuous, time-invariant variable).
- Examine whether there is significant variability between individuals in the association (i.e., random slope) between weekday/weekend and momentary positive affect (i.e., whether individuals differ from each other in the extent to which positive affect increases towards the end of the week), after controlling for subject-level mean and subject-level variance.
- Examining whether the variability between individuals in the association (i.e., random slope) between weekday/weekend and momentary positive affect predicts subject-level obesity risk, after controlling for Age.
- Examining whether participants' Age could moderate the associations between mean levels (i.e., random intercept) and variances (i.e., random scale) in positive affect in predicting obesity risk, and whether participants' Age could moderate weekend-positive affect association (i.e., random slope) in predicting obesity risk.

**Stage 1 outcome variable:** Positive affect (time varying)

**Stage 1 regressor (with random slope):** Weekend vs. Weekday (time varying); Sex (time invariant)

**Stage 2 outcome variable:** Obese or Non-obese (time invariant)

**Stage 2 regressors:** Age (time invariant); Age x random intercept interaction; Age x random scale interaction; Age x random intercept x random scale interaction

## 6.1. Step-by-step instructions for running a Mixregmls- Logistic regression model in MixWILD

1. Double-click on the MixWILD icon to open the main window.

2. Click on **“File”** and then select **“New Model”** (or use keyboard shortcut Ctrl + N).

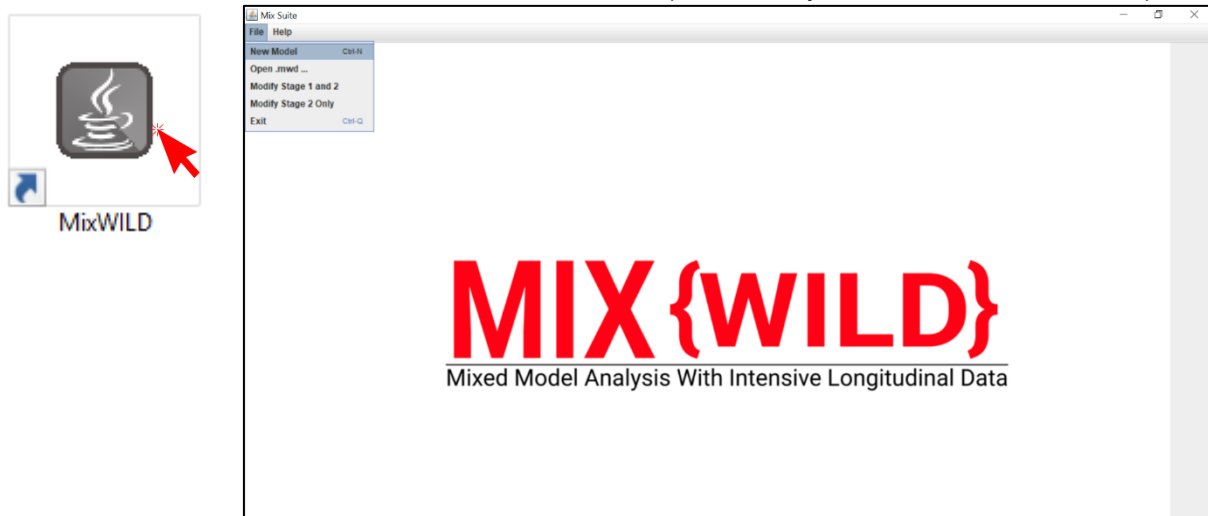

3. Click on **“Instructions”** to make sure your data are in the correct format.

4. Click on **“Browse”** to select the location of your data file (in .csv) and then click **“Open”**.



5. Click on **“View Data”** to preview your data file to verify your data and format are correct.

| ID | AGE   | SEX | WEEKEND | DOW | OBESE | BMI   | NEG_AFFE | POS_AFFE | MVPA_daily | SED_daily |
|----|-------|-----|---------|-----|-------|-------|----------|----------|------------|-----------|
| 1  | 10.47 | 1   | 0       | 0   | 1     | -4.79 | 40       | 27       | 38.19      | -999      |
| 1  | 10.47 | 1   | 0       | 1   | 1     | -4.79 | -999     | 30       | 38.19      | -999      |
| 1  | 10.47 | 1   | 0       | 1   | 1     | -4.79 | 50       | 35       | 38.19      | -999      |
| 1  | 10.47 | 1   | 1       | 5   | 1     | -4.79 | 10       | 38       | 38.19      | -999      |
| 1  | 10.47 | 1   | 0       | 1   | 1     | -4.79 | 35       | 43       | 38.19      | -999      |
| 1  | 10.47 | 1   | 1       | 5   | 1     | -4.79 | 40       | 44       | 38.19      | -999      |
| 1  | 10.47 | 1   | 0       | 1   | 1     | -4.79 | 10       | -999     | 38.19      | -999      |
| 1  | 10.47 | 1   | 0       | 0   | 1     | -4.79 | 20       | -999     | 38.19      | -999      |
| 1  | 10.47 | 1   | 0       | 0   | 1     | -4.79 | 30       | -999     | 38.19      | -999      |
| 1  | 10.47 | 1   | 0       | 0   | 1     | -4.79 | 40       | -999     | 38.19      | -999      |
| 1  | 10.47 | 1   | 1       | 5   | 1     | -4.79 | 40       | -999     | 38.19      | -999      |
| 2  | 20.47 | 1   | 0       | 3   | 1     | -4.79 | 52       | 15       | 22.03      | 9.46      |
| 2  | 20.47 | 1   | 0       | 2   | 1     | -4.79 | 39       | 17       | 22.03      | 9.46      |
| 2  | 20.47 | 1   | 0       | 3   | 1     | -4.79 | 49       | 22       | 22.03      | 9.46      |
| 2  | 20.47 | 1   | 1       | 6   | 1     | -4.79 | 50       | 22       | 22.03      | 9.46      |
| 2  | 20.47 | 1   | 1       | 6   | 1     | -4.79 | 59       | 24       | 22.03      | 9.46      |
| 2  | 20.47 | 1   | 1       | 5   | 1     | -4.79 | 30       | 33       | 22.03      | 9.46      |
| 2  | 20.47 | 1   | 1       | 6   | 1     | -4.79 | 20       | 35       | 22.03      | 9.46      |
| 2  | 20.47 | 1   | 0       | 4   | 1     | -4.79 | 10       | 38       | 22.03      | 9.46      |
| 2  | 20.47 | 1   | 1       | 6   | 1     | -4.79 | 40       | 39       | 22.03      | 9.46      |
| 2  | 20.47 | 1   | 1       | 6   | 1     | -4.79 | 41       | 44       | 22.03      | 9.46      |
| 2  | 20.47 | 1   | 1       | 5   | 1     | -4.79 | 50       | 46       | 22.03      | 9.46      |
| 2  | 20.47 | 1   | 0       | 4   | 1     | -4.79 | 50       | 48       | 22.03      | 9.46      |
| 2  | 20.47 | 1   | 1       | 5   | 1     | -4.79 | 40       | 49       | 22.03      | 9.46      |
| 2  | 20.47 | 1   | 1       | 5   | 1     | -4.79 | 40       | 49       | 22.03      | 9.46      |
| 2  | 20.47 | 1   | 0       | 4   | 1     | -4.79 | 50       | 51       | 22.03      | 9.46      |
| 2  | 20.47 | 1   | 0       | 2   | 1     | -4.79 | 10       | 52       | 22.03      | 9.46      |
| 2  | 20.47 | 1   | 0       | 0   | 1     | -4.79 | 50       | 59       | 22.03      | 9.46      |
| 2  | 20.47 | 1   | 0       | 0   | 1     | -4.79 | 30       | 62       | 22.03      | 9.46      |
| 2  | 20.47 | 1   | 1       | 5   | 1     | -4.79 | 40       | 65       | 22.03      | 9.46      |
| 2  | 20.47 | 1   | 1       | 5   | 1     | -4.79 | 20       | 66       | 22.03      | 9.46      |
| 3  | 17.47 | 1   | 0       | 2   | 1     | -4.79 | 61       | 15       | 22.03      | 9.46      |
| 3  | 17.47 | 1   | 0       | 4   | 1     | -4.79 | 38       | 22       | 22.03      | 9.46      |
| 3  | 17.47 | 1   | 1       | 6   | 1     | -4.79 | 60       | 25       | 22.03      | 9.46      |
| 3  | 17.47 | 1   | 0       | 2   | 1     | -4.79 | 33       | 38       | 22.03      | 9.46      |

6. Add title to your output files. Select **“Intercept + Slope”** from Random Location Effects specification for subject-level mean and subject-level slope. Check **“Random Scale”** for subject-level variability.
7. Select **“Dichotomous/Ordinal”** for the Stage 2 outcome.
8. Click on missing values if there are any in your dataset; specify your missing value code in the box (i.e., -999 in the example dataset).

9. After you submit, the interface will take you to the page that enables you to configure your Stage 1 model.
10. Select ID variable and positive affect as your Stage 1 outcome variable.

11. Specify the association between the mean and within- subject (WS) variance, which is the association of the random location and random scale effects. The default is no association, but “**Yes**” is selected for the following example.
12. Click on “**Modify Stage 1 regressors**”. Select “**Weekend**” for time-varying regressor and select “**Sex**” as a time-invariant regressor and click on “**Submit**”.

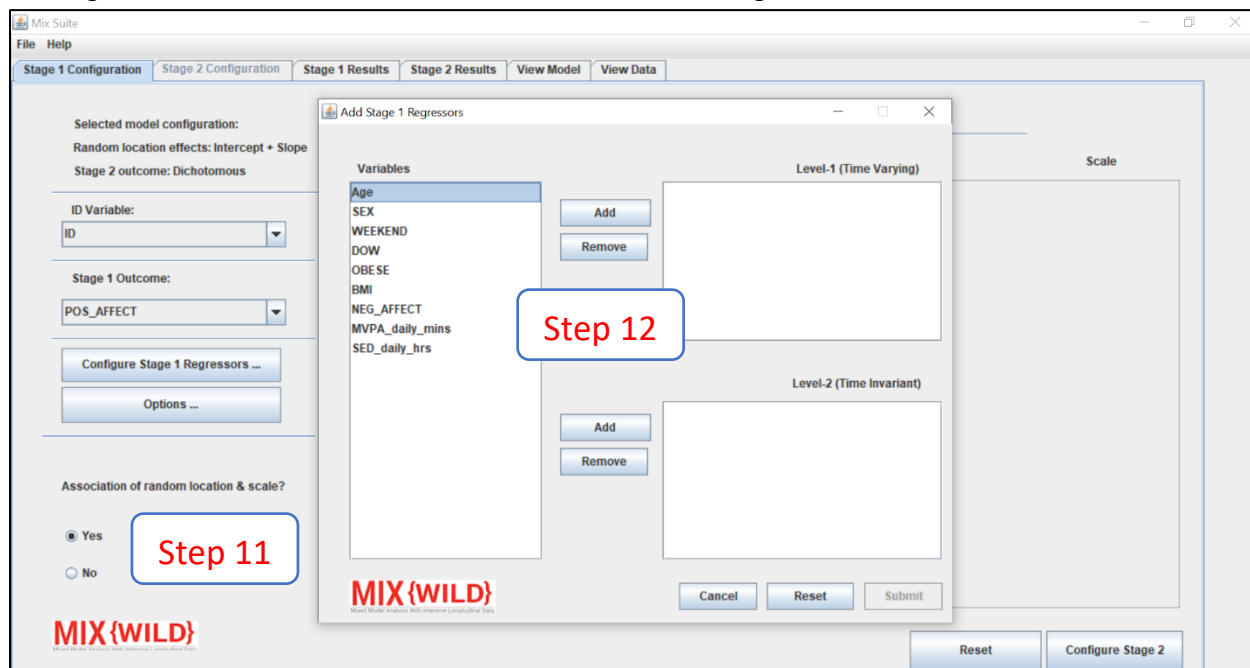

13. Select the boxes in the mean column, random slope, and scale column to allow Stage 1 regressors to predict the mean, estimate random slope, and/or random scale of Stage 1 outcome, respectively. In this example, weekend will be included in the mean model and allow for it to have a random slope (i.e., the positive affect change between weekdays and weekends will be allowed to vary across subjects).

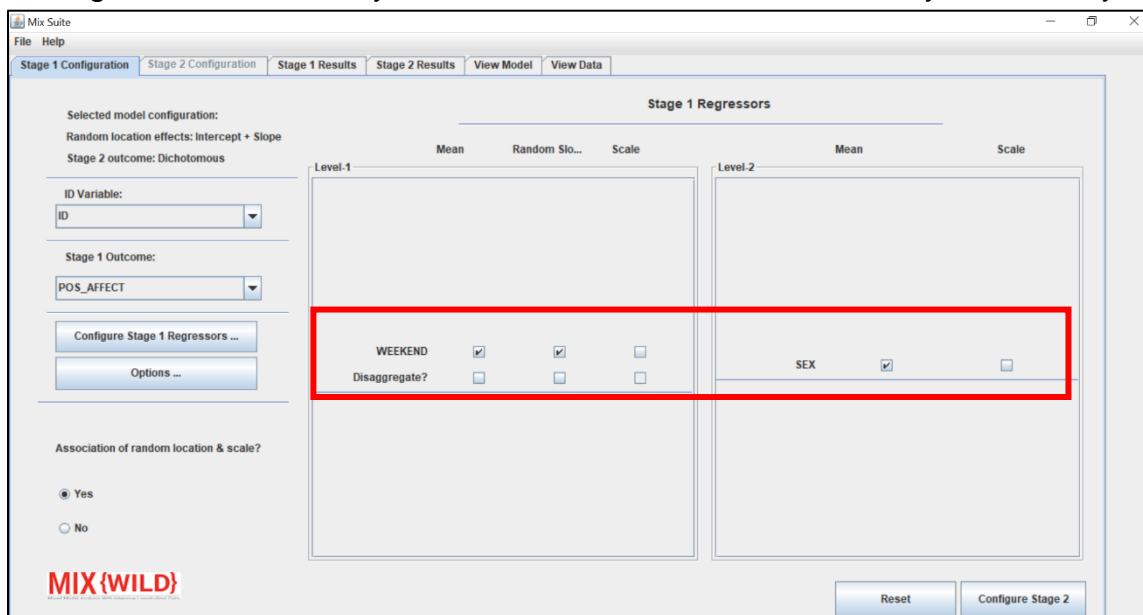

14. Select “**Disaggregate**” for each of the time-varying variable(s) for which decomposition of the within-subject and between-subject effects in predicting Stage 1 outcome is desired. In this case, we will not disaggregate the Weekend variable.

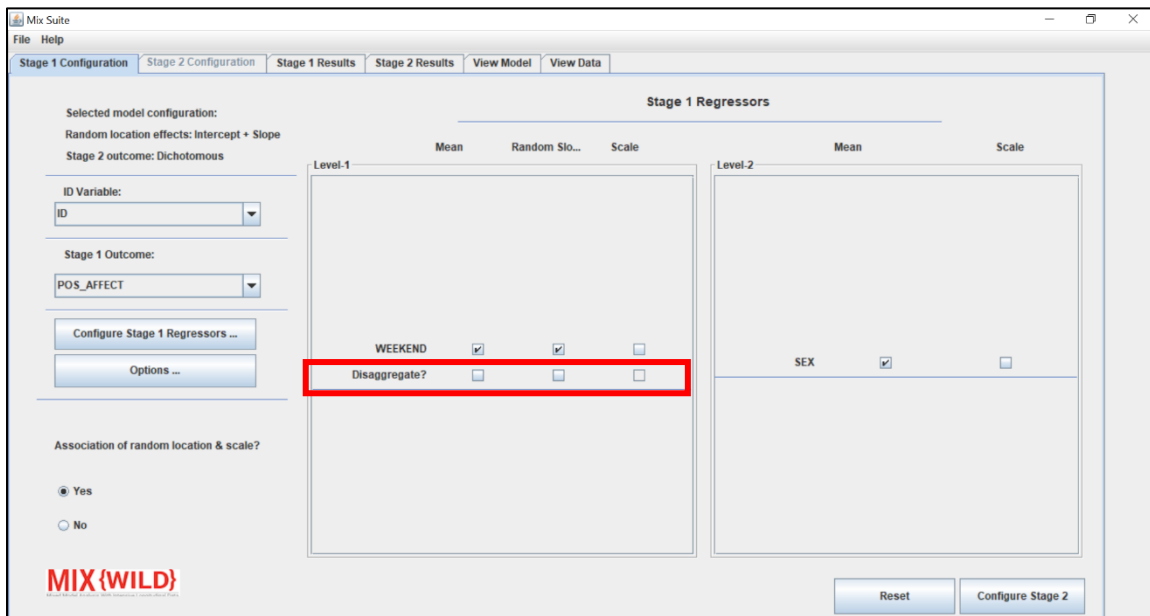

15. Click on “**Options**” to change other default settings if needed. In most cases, we will keep Mean, BS and WS intercept checked.

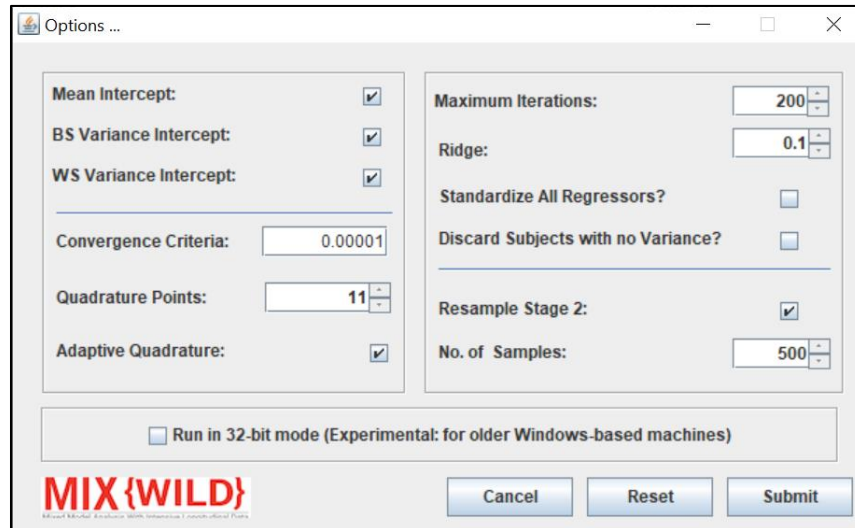

16. By default, the estimated random effects of the Stage 1 analysis (i.e., random location and scale effects) are resampled 500 times in the Stage 2 analysis. Resampling is necessary because the random effects are estimated quantities that are entered as regressors in the Stage 2 model.
17. Leave “**Discard Subjects**” unchecked, so we do not drop participants who have 0 variation in their Stage 1 outcome variable. Click on “**Submit**”  
(Refer to the supplemental documents for further description of Options settings)



18. Select “**Obese**” as Stage 2 dichotomous outcome variable in Stage 2 configuration page. Check if the outcome categories are correct.
19. Click on “**Configure Stage 2 Regressors**” to add regressor(s).

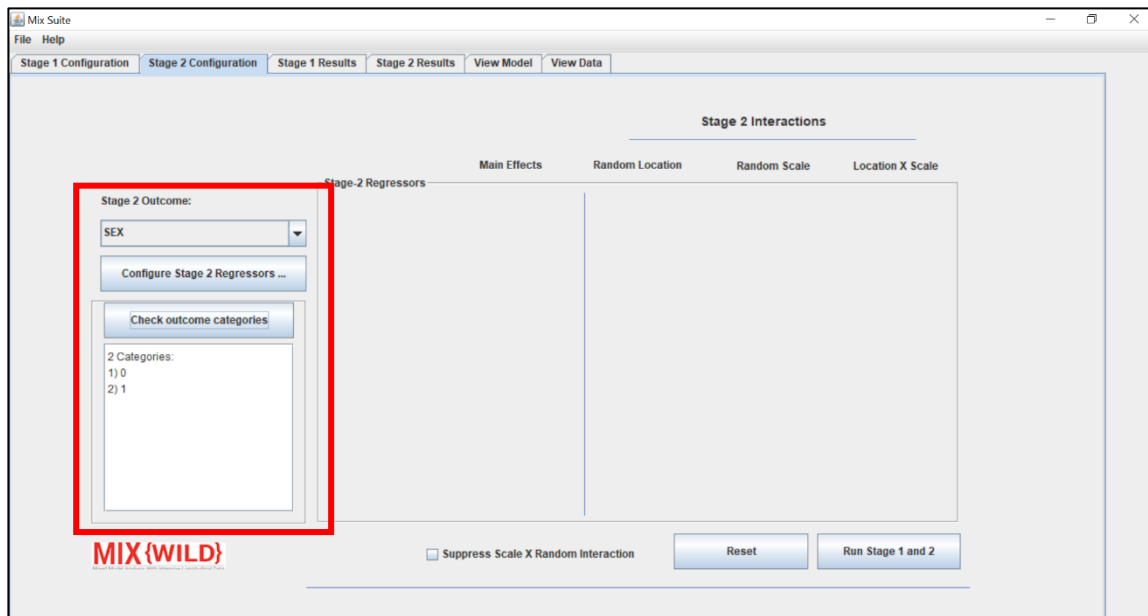

20. Select “**Age**” as a regressor in the Stage 2 model. Stage 2 regressor(s) are generally time-invariant variable(s). However, if they are time-varying variables, the program will calculate subject averages of the variable. Click on “**Submit**” when finished.

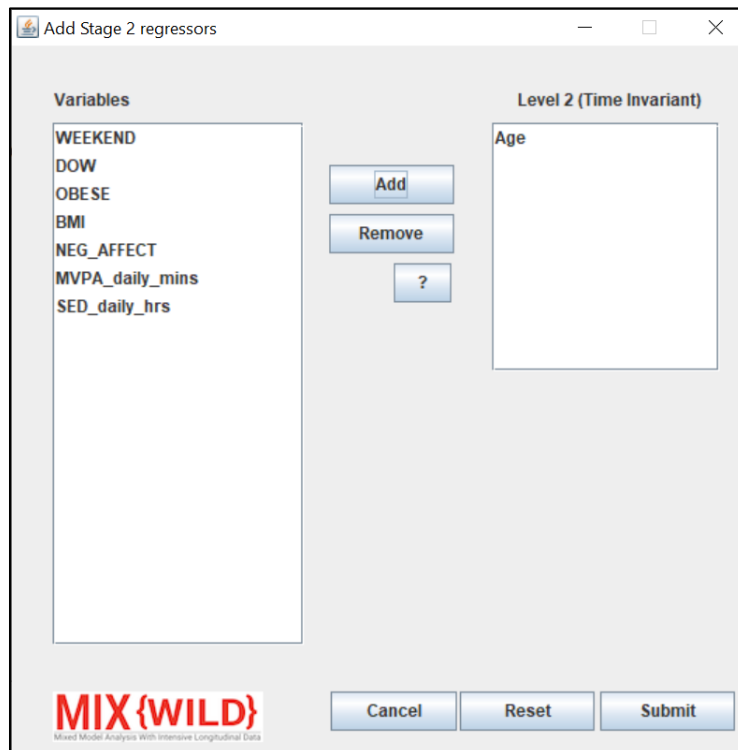

21. Select to add Stage 2 main effect(s) and interaction effect(s) with Stage 1 random effects as regressors.

Stage 2 Outcome: SEX

Configure Stage 2 Regressors ...

Check outcome categories

2 Categories:  
1) 0  
2) 1

MIX {WILD}

Stage 2 Interactions

Main Effects Random Location Random Scale Location X Scale

Stage-2 Regressors

| Stage-2 Regressors | Main Effects                        | Random Location                     | Random Scale                        | Location X Scale                    |
|--------------------|-------------------------------------|-------------------------------------|-------------------------------------|-------------------------------------|
| Age                | <input checked="" type="checkbox"/> | <input checked="" type="checkbox"/> | <input checked="" type="checkbox"/> | <input checked="" type="checkbox"/> |

In this example, we selected "Location x Scale" box, which means that a 3-way interaction will be included to predict stage 2 outcome. Also, the two-way random location x random scale interactions will be included. This location x scale interaction option is enabled only if main effects are selected.

22. Click on Stage 1 and Stage 2 configurations to double-check your model. Click on "Run Stage 1 and 2" to generate the definition file.

Stage 2 Outcome: SEX

Configure Stage 2 Regressors ...

Check outcome categories

2 Categories:  
1) 0  
2) 1

MIX {WILD}

Stage 2 Interactions

Main Effects Random Location Random Scale Location X Scale

Stage-2 Regressors

| Stage-2 Regressors | Main Effects                        | Random Location                     | Random Scale                        | Location X Scale                    |
|--------------------|-------------------------------------|-------------------------------------|-------------------------------------|-------------------------------------|
| Age                | <input checked="" type="checkbox"/> | <input checked="" type="checkbox"/> | <input checked="" type="checkbox"/> | <input checked="" type="checkbox"/> |

Suppress Scale X Random Interaction

Reset Run Stage 1 and 2

23. The definition file contains the syntax that instructs the program to estimate the specified model. In the definition file, click on **“Proceed”** to run your model and generate model output files.

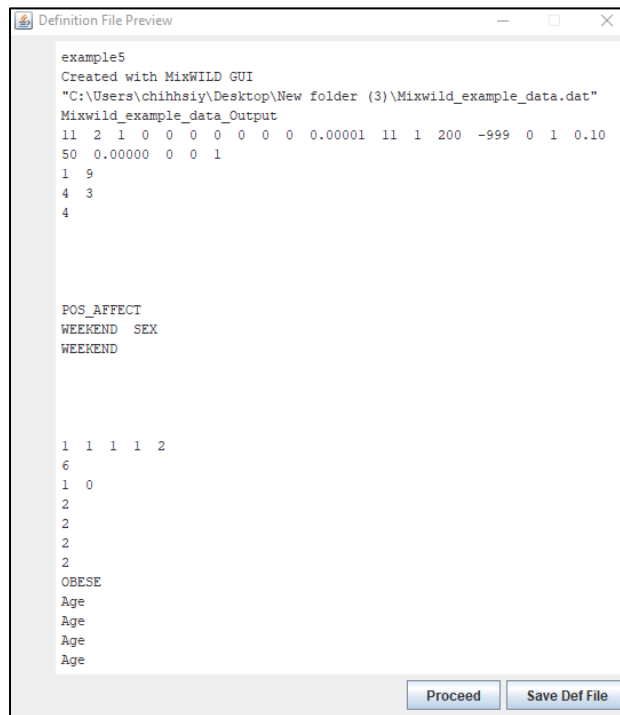

```

example5
Created with MixWILD GUI
"C:\Users\chihhsy\Desktop\New folder (3)\Mixwild_example_data.dat"
Mixwild_example_data_Output
11 2 1 0 0 0 0 0 0 0 0.00001 11 1 200 -999 0 1 0.10
50 0.00000 0 0 1
1 9
4 3
4

POS_AFFECT
WEEKEND SEX
WEEKEND

1 1 1 1 2
6
1 0
2
2
2
2
OBESE
Age
Age
Age
Age
  
```

Proceed Save Def File

24. A window will appear while model estimation is in progress. The time for generating the final output depends on the size of your dataset and the complication of your specified model, especially in the Stage 1 model. The run time to estimate a model including random slope could range up to 20 minutes or longer.

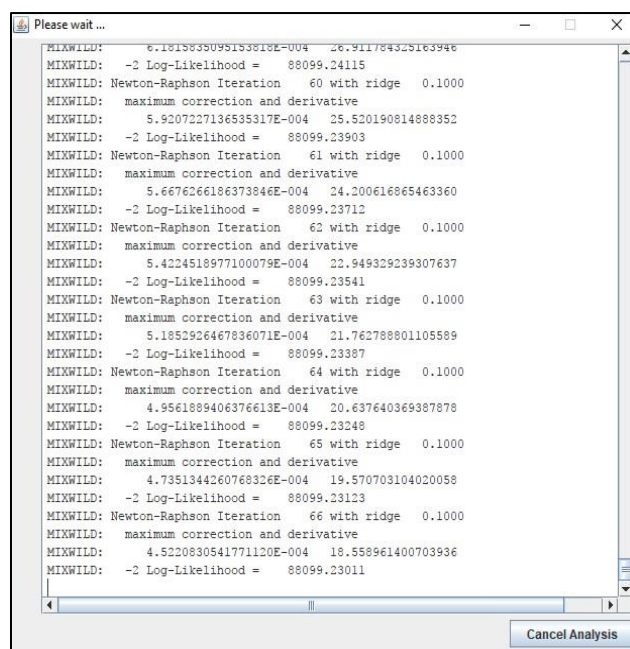

```

Please wait ...
MIXWILD: 6.1815835095153618E-004 26.911784325163946
MIXWILD: -2 Log-Likelihood = 88099.24115
MIXWILD: Newton-Raphson Iteration 60 with ridge 0.1000
MIXWILD: maximum correction and derivative
MIXWILD: 5.9207227136535317E-004 25.520190814888352
MIXWILD: -2 Log-Likelihood = 88099.23903
MIXWILD: Newton-Raphson Iteration 61 with ridge 0.1000
MIXWILD: maximum correction and derivative
MIXWILD: 5.6676266186373846E-004 24.200616865463360
MIXWILD: -2 Log-Likelihood = 88099.23712
MIXWILD: Newton-Raphson Iteration 62 with ridge 0.1000
MIXWILD: maximum correction and derivative
MIXWILD: 5.4224518977100079E-004 22.949329239307637
MIXWILD: -2 Log-Likelihood = 88099.23541
MIXWILD: Newton-Raphson Iteration 63 with ridge 0.1000
MIXWILD: maximum correction and derivative
MIXWILD: 5.1852926467836071E-004 21.762788801105589
MIXWILD: -2 Log-Likelihood = 88099.23387
MIXWILD: Newton-Raphson Iteration 64 with ridge 0.1000
MIXWILD: maximum correction and derivative
MIXWILD: 4.9561889406376613E-004 20.637640369387878
MIXWILD: -2 Log-Likelihood = 88099.23248
MIXWILD: Newton-Raphson Iteration 65 with ridge 0.1000
MIXWILD: maximum correction and derivative
MIXWILD: 4.7351344260768326E-004 19.570703104020058
MIXWILD: -2 Log-Likelihood = 88099.23123
MIXWILD: Newton-Raphson Iteration 66 with ridge 0.1000
MIXWILD: maximum correction and derivative
MIXWILD: 4.5220830541771120E-004 18.558961400703936
MIXWILD: -2 Log-Likelihood = 88099.23011
  
```

Cancel Analysis

25. If the following warning message appears, it indicates that computational difficulties were encountered and prevented the model parameters from being estimated successfully. In this case, double-check the format of your dataset and your model specifications. Some suggestions for steps to take are listed in Appendix A.



26. When estimation is completed, the Stage 1 and Stage 2 results can be seen by clicking the Stage 1 and Stage 2 Results boxes, respectively.

| Stage 1 Configuration                                                    | Stage 2 Configuration | Stage 1 Results | Stage 2 Results | View Model | View Data |
|--------------------------------------------------------------------------|-----------------------|-----------------|-----------------|------------|-----------|
| <b>Results from stage 1 analysis</b>                                     |                       |                 |                 |            |           |
| -----<br>Model WITH RANDOM Scale and Location-Scale Association<br>----- |                       |                 |                 |            |           |
| ==> multiplied by -2                                                     |                       |                 |                 |            |           |
| Log Likelihood                                                           |                       | =               | 99495.733       |            |           |
| Akaike's Information Criterion                                           |                       | =               | 99515.733       |            |           |
| Schwarz's Bayesian Criterion                                             |                       | =               | 99566.380       |            |           |
| -----                                                                    |                       |                 |                 |            |           |
| Variable                                                                 | Estimate              | AsymStdError    | z-value         | p-value    |           |
| -----                                                                    |                       |                 |                 |            |           |
| BETA (regression coefficients)                                           |                       |                 |                 |            |           |
| Intercept                                                                | 42.96071              | 0.50136         | 85.68797        | 0.00000    |           |
| WEEKEND                                                                  | 1.67701               | 0.23744         | 7.06279         | 0.00000    |           |
| SEX                                                                      | -0.65533              | 0.56931         | -1.15108        | 0.24970    |           |
| Random (location) Effect Variances and Covariances                       |                       |                 |                 |            |           |
| Intercept                                                                | 71.74435              | 3.91378         | 18.33122        | 0.00000    |           |
| Covariance12                                                             | -9.81601              | 2.35683         | -4.16493        | 0.00003    |           |
| WEEKEND                                                                  | 14.26338              | 2.57335         | 5.54273         | 0.00000    |           |
| TAU (WS variance parameters: log-linear model)                           |                       |                 |                 |            |           |
| Intercept                                                                | 4.71828               | 0.01968         | 239.78505       | 0.00000    |           |
| Random location effects on WS variance (log-linear model)                |                       |                 |                 |            |           |
| Intercept                                                                | -0.12884              | 0.02304         | -5.59199        | 0.00000    |           |
| WEEKEND                                                                  | -0.03716              | 0.03530         | -1.05270        | 0.29248    |           |
| Random scale standard deviation                                          |                       |                 |                 |            |           |
| Std Dev                                                                  | 0.40514               | 0.02103         | 19.26143        | 0.00000    |           |

| Stage 1 Configuration                   | Stage 2 Configuration | Stage 1 Results | Stage 2 Results      | View Model | View Data |
|-----------------------------------------|-----------------------|-----------------|----------------------|------------|-----------|
| <b>Results from stage 2 analysis</b>    |                       |                 |                      |            |           |
| Number of successful replications = 500 |                       |                 |                      |            |           |
| -----                                   |                       |                 |                      |            |           |
| Final Results                           |                       |                 |                      |            |           |
| -----                                   |                       |                 |                      |            |           |
| Average Log Likelihood                  |                       | =               | -633.691 (sd= 4.049) |            |           |
| Akaike's Information Criterion          |                       | =               | -643.691             |            |           |
| Schwarz's Bayesian Criterion            |                       | =               | -669.015             |            |           |
| -----                                   |                       |                 |                      |            |           |
| ==> multiplied by -2                    |                       |                 |                      |            |           |
| Log Likelihood                          |                       | =               | 1267.382             |            |           |
| Akaike's Information Criterion          |                       | =               | 1287.382             |            |           |
| Schwarz's Bayesian Criterion            |                       | =               | 1338.030             |            |           |
| -----                                   |                       |                 |                      |            |           |
| Variable                                | Estimate              | AsymStdError    | z-value              | p-value    |           |
| -----                                   |                       |                 |                      |            |           |
| Intercept                               | -0.23204              | 0.12897         | -1.79908             | 0.07201    |           |
| Age                                     | 0.05102               | 0.00865         | 5.89725              | 0.00000    |           |
| Locat_1                                 | -0.26222              | 0.10074         | -2.60300             | 0.00924    |           |
| Locat_1*Age                             | 0.00489               | 0.00611         | 0.80068              | 0.42332    |           |
| Locat_2                                 | -0.03530              | 0.13734         | -0.25703             | 0.79716    |           |
| Locat_2*Age                             | 0.00409               | 0.01000         | 0.40871              | 0.68275    |           |
| Scale                                   | 0.15985               | 0.12141         | 1.31670              | 0.18794    |           |
| Scale*Age                               | 0.02447               | 0.00788         | 3.10482              | 0.00190    |           |
| Locat_1*Scale                           | 0.16109               | 0.14936         | 1.07849              | 0.28082    |           |
| L*S*Age                                 | -0.00006              | 0.00943         | -0.00608             | 0.99515    |           |

27. All files generated from the program can be found in a folder with the prefix MixWILD under the same directory of your dataset.

| Name                 | Date modified      | Type                                        |
|----------------------|--------------------|---------------------------------------------|
| MIXWILD151988993     | 3/6/2018 5:39 PM   | File folder                                 |
| Mixwild_example_data | 2/26/2018 11:54 AM | Microsoft Excel Comma Separated Values File |

28. The OUT files with suffix \_1 and \_2 are the results that are identical to those in the Stage 1 and Stage 2 boxes.

| Name                                     | Date modified      | Type        | Size     |
|------------------------------------------|--------------------|-------------|----------|
| work                                     | 4/2/2018 12:25 PM  | File folder |          |
| mix_random                               | 2/26/2018 12:18 PM | DEF File    | 1 KB     |
| mix_random                               | 2/26/2018 11:55 AM | Application | 665 KB   |
| mixor                                    | 2/26/2018 11:55 AM | Application | 914 KB   |
| mixreg                                   | 2/26/2018 11:55 AM | Application | 967 KB   |
| MIXREGMLS_RANDOM_MIXOR                   | 2/26/2018 11:55 AM | DEF File    | 1 KB     |
| Mixwild_example_data                     | 2/26/2018 11:55 AM | DAT File    | 635 KB   |
| Mixwild_example_data_Output              | 2/26/2018 11:55 AM | DEF File    | 1 KB     |
| Mixwild_example_data_Output.mwa          | 2/26/2018 11:55 AM | MWA File    | 94 KB    |
| Mixwild_example_data_Output.mwd          | 2/26/2018 11:55 AM | MWD File    | 20 KB    |
| Mixwild_example_data_Output_1            | 2/26/2018 12:18 PM | OUT File    | 14 KB    |
| Mixwild_example_data_Output_2            | 2/26/2018 12:18 PM | OUT File    | 3 KB     |
| Mixwild_example_data_Output_ebrandom     | 2/26/2018 12:18 PM | DAT File    | 1,715 KB |
| Mixwild_example_data_Output_ebvar        | 2/26/2018 12:18 PM | DAT File    | 157 KB   |
| Mixwild_example_data_Output_level2       | 2/26/2018 12:18 PM | DAT File    | 107 KB   |
| Mixwild_example_data_Output_random       | 2/26/2018 12:18 PM | DEF File    | 1 KB     |
| Mixwild_example_data_Output_random_500   | 2/26/2018 12:18 PM | OUT File    | 2 KB     |
| Mixwild_example_data_Output_repeat_mixor | 2/26/2018 12:18 PM | DEF File    | 1 KB     |
| repeat_mixor                             | 2/26/2018 12:18 PM | DEF File    | 1 KB     |
| repeat_mixor                             | 2/26/2018 11:55 AM | Application | 680 KB   |
| repeat_mixreg                            | 2/26/2018 11:55 AM | Application | 677 KB   |

29. There are 3 submodel results in Output\_1. The first two submodels present the results with and without random scale estimates, and the third submodel include the estimation of random location effects as well as the random location-slope associations as follows. (A brief description of the results from the following third submodel will be provided)

#### Model WITH RANDOM Scale and Location-Scale Association

Total Iterations = 16  
Final Ridge value = 0.00

Log Likelihood = -49747.866  
Akaike's Information Criterion = -49757.866  
Schwarz's Bayesian Criterion = -49783.190

### 6.3. Brief interpretation of Mixregmls-Logistic regression model result

#### Stage 1 model with random scale and location-scale association

| Model WITH RANDOM Scale and Location-Scale Association    |          |              |           |         |
|-----------------------------------------------------------|----------|--------------|-----------|---------|
| Variable                                                  | Estimate | AsymStdError | z-value   | p-value |
| BETA (regression coefficients)                            |          |              |           |         |
| Intercept                                                 | 42.96071 | 0.50136      | 85.68797  | 0.00000 |
| WEEKEND                                                   | 1.67701  | 0.23744      | 7.06279   | 0.00000 |
| SEX                                                       | -0.65533 | 0.56931      | -1.15108  | 0.24970 |
| Random (location) Effect Variances and Covariances        |          |              |           |         |
| Intercept                                                 | 71.74435 | 3.91378      | 18.33122  | 0.00000 |
| Covariance12                                              | -9.81601 | 2.35683      | -4.16493  | 0.00003 |
| WEEKEND                                                   | 14.26338 | 2.57335      | 5.54273   | 0.00000 |
| TAU (WS variance parameters: log-linear model)            |          |              |           |         |
| Intercept                                                 | 4.71828  | 0.01968      | 239.78505 | 0.00000 |
| Random location effects on WS variance (log-linear model) |          |              |           |         |
| Intercept                                                 | -0.12884 | 0.02304      | -5.59199  | 0.00000 |
| WEEKEND                                                   | -0.03716 | 0.03530      | -1.05270  | 0.29248 |
| Random scale standard deviation                           |          |              |           |         |
| Std Dev                                                   | 0.40514  | 0.02103      | 19.26143  | 0.00000 |

- The Stage 1 model shows that weekend is positively associated with positive affect (estimate=1.6489,  $p<.001$ ). Individuals overall have higher mean positive affect on weekend days relative to weekdays.
- There is significant variability in both intercept (i.e., random intercept) and slope (i.e., random slope) across subjects. The random intercept is estimated as 71.7444 on the log scale ( $p<.001$ ) and the random slope is estimated as 14.2634 on the log scale ( $p<.001$ ). Therefore, individuals differ from each other in their mean levels of positive affect and in their associations between weekday/weekend and momentary positive affect.
- The random intercept and random slope are negatively associated with each other (estimate= -9.8160,  $p<.001$ ). This negative covariance indicates that subjects with higher weekday mean levels of positive affect (i.e., higher levels of the intercept) do not increase in positive affect as much on weekends, relative to subjects with lower weekday positive affect.
- For the relationships between the random location and scale effects, the random intercept (i.e., weekday positive affect) is negatively associated with the WS variance

(estimated as -0.1288 on the log scale ( $p < .001$ )). This indicates that **subjects with higher weekday positive affect are more consistent/less erratic in their mood reports.**

A subject's random slope (positive affect change on weekend days relative to weekdays) is not significantly related to a subject's WS variance.

- There is significant variability in scale across subjects, as the Std Dev for the Random scale is estimated as 0.4051 on the log scale ( $p < .001$ ). Thus, individuals differ from each other in their degree of within-subject/intraindividual variability in positive affect.



## Stage 2 model with dichotomous subject-level outcome

```

-----
Final Results
-----
Average Log Likelihood      =   -633.691 (sd= 4.049)|
Akaike's Information Criterion =   -643.691
Schwarz's Bayesian Criterion =   -669.015

==> multiplied by -2
Log Likelihood              =    1267.382
Akaike's Information Criterion =    1287.382
Schwarz's Bayesian Criterion =    1338.030

Variable                    Estimate      AsymStdError      z-value          p-value
-----
Intercept                   -0.23204      0.12897           -1.79908         0.07201
Age                          0.05102      0.00865           5.89725         0.00000
Locat_1                      -0.26222      0.10074           -2.60300         0.00924
Locat_1*Age                  0.00489      0.00611           0.80068         0.42332
Locat_2                      -0.03530      0.13734           -0.25703         0.79716
Locat_2*Age                  0.00409      0.01000           0.40871         0.68275
Scale                        0.15985      0.12141           1.31670         0.18794
Scale*Age                    0.02447      0.00788           3.10482         0.00190
Locat_1*Scale                0.16109      0.14936           1.07849         0.28082
L*S*Age                      -0.00006      0.00943           -0.00608         0.99515

```

- In the Stage 2 final results table, *Locat\_1* refers to the effect of the random intercept (i.e., within-subject mean) on obesity risk; *Locat\_2* refers to the effect of the random slope (i.e., within-subject association between weekday/weekend and positive affect) on obesity risk; *Scale* refers to the effect of random scale (i.e., within-subject variance) on obesity risk; and *Locat\_1\*Scale* is the interaction between random intercept and random scale predicting obesity risk.
- Results show that after controlling for other variables, subjects' Age is positively associated with increased obesity risk (estimate OR= 0.0510,  $p<.001$ ). Older subjects are more likely to be obese than younger subjects.
- The random intercept (*Locat\_1*) positively predicts obesity risk when the random slope and random slope are zero (estimate OR= -0.2622,  $p<.001$ ). Since the random effects are centered around zero, a random scale of zero represents the average scale. For subjects with average scale of positive affect, higher levels of weekday positive affect are associated with higher daily MVPA minutes.
- The interaction between Age and random scale is significant in predicting obesity risk in this model (estimate OR= -0.0245,  $p<.001$ ). The positive association of Age on obesity risk is more pronounced for subjects that are more erratic/less stable in

their positive affect scores. Subjects who are older and who have higher variability in positive affect are more likely to be obese.

- The random slope and other 2-way and 3-way interactions do not predict people's obesity risk in this model.

**Note:**

1. The numbers of level 1 and level 2 observations correspond to the available non-missing observations of level 1 and level 2 variables included in both Stage 1 and Stage 2 models. Thus, these analyses are carried out using observations that are non-missing in terms of both outcomes (Positive affect and Obesity) and all regressors (Weekend, Sex, and Age).
2. In terms of level-1 variables (Positive affect and Weekend), only the level-1 missing observations are removed. In terms of the level-2 variables (Obesity, Sex, and Age), if a given subject is missing any of these, then they are not included in the analyses.
3. Please refer to the supplemental documents for more detailed explanation of the Stage 1 and Stage 2 model results.

## 7. Appendix A: Steps to take when the program does not converge to a solution

MixWILD can be used to estimate some rather advanced and complicated statistical models. In some cases, the program does not converge to a solution. This can be because the data does not contain enough information to estimate all of the parameters of the specified model. In this case, trying to estimate a simpler model is warranted. In general, it is good practice to start simply and build model complexity incrementally. In this way, users can get a feel for which variables and/or options may be causing trouble in estimation.

In addition to simplifying the model that one is attempting to estimate, the MixWILD program does include some options that can sometimes be modified to help in estimation of the model parameters. These are included on the Options page and will be described below.

1. This first comment pertains to models that include random scale parameters. Random scale parameters allow subjects to have individual estimates of the within-subject variance, and this is the distinguishing feature of a **mixed-effects location scale model**. The possibility of random scale parameters is specified on the first page that is encountered in the MixWILD program under the “**Random Scale?**” selection. In the graphic below, this is not specified, but clicking on the box to the right of “**Random Scale?**” adds random scale parameters to the Stage 1 model.

The screenshot shows the 'Options' dialog box for MixWILD. The window title is 'Is your dataset Mix{WILD} friendly?'. It features a 'Check here...' button in the top right. Below this, there is a 'Data File:' label followed by a text input field and a 'Browse' button. A 'Title:' label is followed by another text input field. The 'Random Location Effects:' section has two radio buttons: 'Intercept' (selected) and 'Intercept + Slope(s)'. The 'Random Scale?' option is represented by an unchecked checkbox. The 'Stage 2 Outcome:' section has three radio buttons: 'Continuous' (selected), 'Dichotomous/Ordinal', and 'None'. The 'Contains missing values?' section has two radio buttons: 'Yes' (selected) and 'No'. A 'Missing value code:' label is followed by a text input field. At the bottom left is the 'MIX{WILD}' logo with the tagline 'Mixed Model Analysis With Intensive Longitudinal Data'. At the bottom right are three buttons: 'Cancel', 'Reset', and 'Submit'.

In some cases, there may be subjects in the dataset that exhibit no variation on the Stage 1 outcome variable. In other words, their values on the outcome variable are exactly the same for all of their observations. This can be particularly true if there are subjects with few observations (say 2 or 3) in the dataset and/or the Stage 1 outcome variable is not really continuous but an ordinal outcome with say 5 categories. For such subjects with no variation on the outcome, the estimate of their random scale goes to negative infinity and can cause the program to fail to converge. In this case, selection of the “**Discard Subjects with no Variance?**” option (clicking on the box to the right of this question) on the Options page can facilitate model convergence. Selection of this option will remove these subjects from the Stage 1 analysis (and also the Stage 2 analysis if that is specified).

2. In some cases, the scale of the regressors included in an analysis can be very large. For example, consider a scenario in which one has a variable for days in the study, which ranges from 1 to 365 for a year-long study. In this case, because of the large scale of the variable, any parameter associated with this variable will be quite small and can be difficult to estimate. In such cases, standardizing the regressors by selecting “Standardize All Regressors” might be considered. Selection of this option will transform all regressors to be variables with 0 mean and variance of 1.

3. Estimation of the Stage 1 model involves a numerical integration (i.e., quadrature) over the random effect distribution. By default, MixWILD performs adaptive quadrature with 11 points to do this integration. The more points one uses, typically the more accurate is the solution, but also the more time it takes to estimate the model parameters. Usually, 11 points is sufficient, but if model convergence is not achieved, then increasing the points can sometimes help. So, for example, one might try 15, 21, or 25 points rather than the default of 11. Switching from adaptive to non-adaptive quadrature can sometimes work, though typically adaptive quadrature is preferred.

4. The value of the “Ridge” is usually set to a small fractional value. The ridge increases the values of the diagonal elements of the 2<sup>nd</sup> derivative matrix by a factor of 1 multiplied by the ridge value (i.e., if the ridge is set to .1, then the diagonal elements of the 2<sup>nd</sup> derivative matrix are all multiplied by 1.1). The reason that this is helpful is that this matrix must be inverted at each iteration of the solution, and inversion of this matrix becomes computationally difficult to the extent that the off-diagonal elements of this matrix get large, relative to the diagonal elements. Thus, in cases of non-convergence, one might try increasing the ridge value to 0.15, 0.2, or even 0.25. This will slow down the estimation, but in some cases can aid in model convergence.

Ultimately, if one tries these options and still experiences convergence problems, it is probably the case that the data does not contain enough information to estimate the specified model. Again, it is a good idea to start simply and to build model complexity in an incremental manner. For example, one might start with a model that does not include any regressors (i.e., a null model) and then to add in regressors one by one or in sets of variables. This will help to isolate where problems develop and to indicate what is and what is not possible with a given dataset.
